# Supplementary material
Source: publisher figshare collection journal article supplement (https://acs.figshare.com/ndownloader/files/4313527)

# Facile Synthesis of Enantioenriched C<sup>γ</sup>-Tetrasubstituted α-Amino Acid Derivatives via an Asymmetric Nucleophilic Addition/Protonation Cascade

Shu-Wen Duan, Jing An, Jia-Rong Chen\* and Wen-Jing Xiao\*

## Contents

1. General Information
2. Preparation and Spectral Data of Substrates
  - 2.1 Preparation of the Michael donors
  - 2.2 Preparation of the Michael acceptor
  - 2.3 Spectral Data of Substrates
3. General Procedure and Spectral Data of Products
  - 3.1 General Procedure
  - 3.2 Spectral Data of Products
4. Derivatizations of the adduct **3a**
5. X-Ray structure of **3d**
6. Copies of <sup>1</sup>H NMR and <sup>13</sup>C NMR Spectrums
7. Copies HPLC chromatograms

## 1. General Information

Unless otherwise noted, materials were purchased from commercial suppliers and used without further purification. All the solvents were treated according to general methods. Flash column chromatography was performed using 200-300 mesh silica gel.  $^1\text{H}$  NMR spectra were recorded on Varian Mercury 400/600 (400/600 MHz) spectrophotometers. Chemical shifts ( $\delta$ ) are reported in ppm from the solvent resonance as the internal standard ( $\text{CDCl}_3$ : 7.26 ppm). Data are reported as follows: chemical shift, multiplicity (s = singlet, d = doublet, t = triplet, dd = doublet of doublets, m = multiplet), coupling constants (Hz) and integration.  $^{13}\text{C}$  NMR spectra were recorded on Varian Mercury 400/600 (100/150 MHz) with complete proton decoupling spectrophotometers ( $\text{CDCl}_3$ : 77.0 ppm). Mass spectra were measured on a Finnigan Trace MS spectrometer (EI) or API 2000 LC/MS/MS (ESI-MS). Enantiomeric ratios were determined by chiral HPLC on Agilent 1100 series with chiral columns (chiralpak AS-H column, chiralpak AD-H column or chiralcel OD-H column) with hexane and *i*-PrOH as solvents. Optical rotations were measured with JASCO P-1020 polarimeter.

## 2. Preparation and Spectral Data of Substrates

### 2.1 Preparation of Michael donors.

3-Substituted oxindoles **1a**, **1b** were prepared by following the procedure Route 1 in reference<sup>1a, b</sup>. 3-Benzyl oxindole **1l** was prepared by Route 2<sup>1a</sup>.

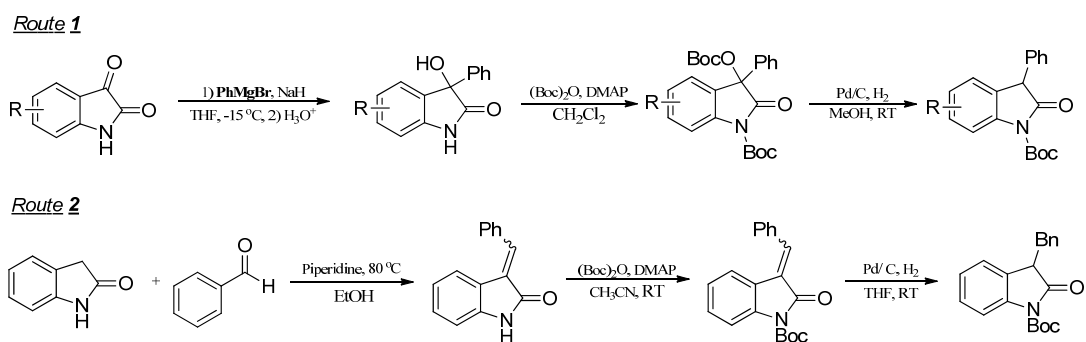

### Oxindoles **1c-1k** were obtained by following procedure Route 3

To a solution of oxindole **A** (8.3 mmol) in THF (20 ml), NaH (10.0 mmol) was added at  $-15\text{ }^{\circ}\text{C}$  and stirred for 30 min.  $\text{ArMgBr}$  (10.0 mmol) in ether was then added dropwise to the reaction mixture and allowed to warm to rt. A solution of 2N HCl. (30 ml) was added and the mixture was extracted with ether. The organic phase was washed with sat.  $\text{Na}_2\text{CO}_3$  and brine. The combined organic layers were dried over  $\text{Na}_2\text{SO}_4$  and the solvent was evaporated under reduced pressure. Purification by recrystallization (petroleum ether: ethyl acetate) was carried out to give **B** as light orange solid.

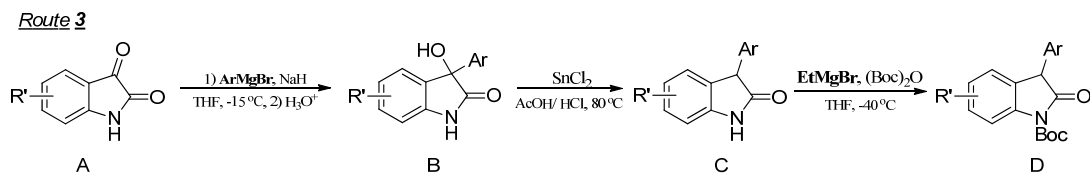

To a solution of **B** (6.6 mmol) in AcOH/HCl (30mL/2 ml), SnCl<sub>2</sub> (13.2 mmol) was added at rt. Then the mixture was heated to reflux for 1h. The mixture was diluted with H<sub>2</sub>O and extracted with ether. The organic phase was washed with aqueous sodium hydroxide solution and brine. The combined organic layers were dried over Na<sub>2</sub>SO<sub>4</sub> and the solvent was evaporated under reduced pressure. Purification by recrystallization (petroleum ether: ethyl acetate) was carried out to give **C** as white solid.

To a solution of **C** (5.8 mmol) in THF (20 ml), EtMgBr (7.0 mmol) in ether was added dropwise at – 40 °C followed by adding (Boc)<sub>2</sub>O in one portion. The mixture was stirred at the same temperature for 30 min and warmed to rt. Then the mixture was diluted with ether and quenched with sat.NH<sub>4</sub>Cl and extracted with ether. The combined organic layers were washed with H<sub>2</sub>O and brine and dried over Na<sub>2</sub>SO<sub>4</sub>. Purification by flash silica-gel column chromatography (petroleum ether: ethyl acetate) was carried out to give **D** as white solid.

## 2.2 Preparation of Michael acceptor.

2-phthalimidoacrylate was prepared according to literatures <sup>2</sup>.

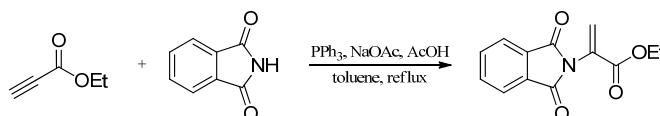

## Reference

- (1) (a) Ishimaru, T.; Shibata, N.; Nagai, J.; Nakamura, S.; Toru, T.; Kanemasa, S. *J. Am. Chem. Soc.* **2006**, *128*, 16488. (b) Huang, A.; Kodanko, J.; Overman, L. E. *J. Am. Chem. Soc.* **2004**, *126*, 14043.
- (2) (a) Trost, B. M.; Dake, G. R. *J. Am. Chem. Soc.* **1997**, *119*, 7595. (b) Leow, D.; Lin, S.-S.; Chittimalla, S. K.; Fu, X.; Tan, C.-H. *Angew. Chem. Int. Ed.* **2008**, *47*, 5641.

## 2.3 Spectral Data of Substrates

### *tert*-butyl 5-bromo-2-oxo-3-phenylindoline-1-carboxylate (**1d**)

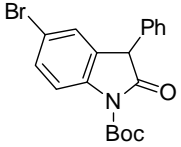  $^1\text{H}$  NMR (400 MHz,  $\text{CDCl}_3$ )  $\delta$  (ppm) 7.84 (d,  $J$  = 8.7 Hz, 1H), 7.48 (d,  $J$  = 8.6 Hz, 1H), 7.34 (t,  $J$  = 8.2 Hz, 4H), 7.17 (d,  $J$  = 6.7 Hz, 2H), 4.70 (s, 1H), 1.62 (s, 9H).  $^{13}\text{C}$  NMR (100 MHz,  $\text{CDCl}_3$ )  $\delta$  (ppm) 172.91, 149.06, 139.40, 135.43, 131.52, 129.23, 128.48, 128.05, 127.93, 117.48, 116.69, 84.70, 52.24, 27.95. MS:  $m/z$  = 388.97 ( $\text{M}^+$ ).

### *tert*-butyl 2-oxo-3-phenyl-5-(trifluoromethoxy)indoline-1-carboxylate (**1e**)

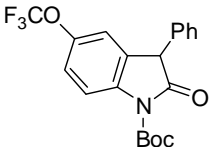  $^1\text{H}$  NMR (600 MHz,  $\text{CDCl}_3$ )  $\delta$  (ppm) 7.99 (d,  $J$  = 8.9 Hz, 1H), 7.99 (d,  $J$  = 8.9 Hz, 1H), 7.64 – 7.30 (m, 4H), 7.42 – 7.29 (m, 4H), 7.30 – 7.08 (m, 5H), 7.21 (dd,  $J$  = 23.3 Hz, 8.2, 3H), 7.05 (s, 1H), 7.05 (s, 1H), 4.74 (s, 1H), 4.74 (s, 1H), 1.62 (s, 10H), 1.62 (s, 9H).  $^{13}\text{C}$  NMR (150 MHz,  $\text{CDCl}_3$ )  $\delta$  (ppm) 173.12, 149.13, 145.91, 138.99, 135.29, 128.67, 128.12, 126.56, 121.53, 118.33, 116.20, 84.81, 52.42, 27.96. MS:  $m/z$  = 393.02 ( $\text{M}^+$ ).

### *tert*-butyl 6-chloro-2-oxo-3-phenylindoline-1-carboxylate (**1f**)

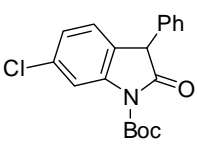  $^1\text{H}$  NMR (600 MHz,  $\text{CDCl}_3$ )  $\delta$  (ppm) 8.02 (d,  $J$  = 1.7 Hz, 1H), 7.33 (m, 3H), 7.20 – 7.13 (m, 3H), 7.08 (d,  $J$  = 8.0 Hz, 1H), 4.69 (s, 1H), 1.63 (s, 9H).  $^{13}\text{C}$  NMR (150 MHz,  $\text{CDCl}_3$ )  $\delta$  (ppm) 173.25, 149.01, 141.24, 135.64, 134.27, 128.91, 128.43, 127.97, 125.82, 125.66, 124.59, 115.74, 84.80, 52.01, 27.91. MS:  $m/z$  = 343.03 ( $\text{M}^+$ ).

### *tert*-butyl 6-bromo-2-oxo-3-phenylindoline-1-carboxylate (**1g**)

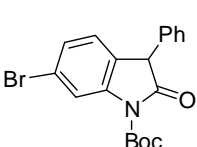  $^1\text{H}$  NMR (600 MHz,  $\text{CDCl}_3$ )  $\delta$  (ppm) 8.17 (d,  $J$  = 1.5 Hz, 1H), 7.38 – 7.30 (m, 4H), 7.17 (d,  $J$  = 6.9 Hz, 2H), 7.03 (d,  $J$  = 8.0 Hz, 1H), 4.66 (s, 1H), 1.62 (s, 9H).  $^{13}\text{C}$  NMR (150 MHz,  $\text{CDCl}_3$ )  $\delta$  (ppm) 173.11, 148.99, 141.38, 135.52, 128.90, 128.42, 127.97, 127.48, 126.19, 122.12, 118.51, 84.81, 52.05, 27.93. MS:  $m/z$  = 388.90 ( $\text{M}^+$ ).

## 3. General Procedure and Spectral Data of Products

### 3.1 General Procedure

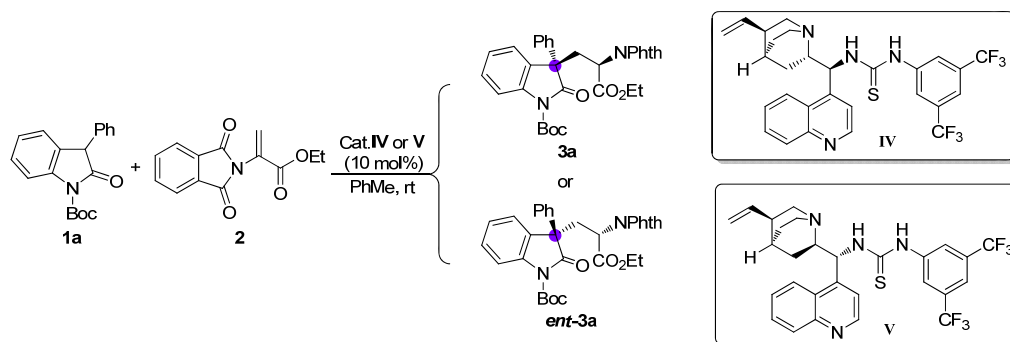

A mixture of *tert*-butyl 2-oxo-3-phenylindoline-1-carboxylate **1a** (0.24 mmol, 74.2 mg), **2** (0.2 mmol, 49.0 mg) and catalyst **IV** (0.02 mmol, 11.3 mg) in toluene (1 mL) was stirred at room temperature for 10

h. The crude product was purified by flash chromatography on silica gel (petroleum ether/ethyl acetate 10:1~8:1) to give the desired product **3a** as a white solid.

### 3.2 Spectral Data of Products

#### *tert*-butyl 3-(2-(1,3-dioxoisindolin-2-yl)-3-ethoxy-3-oxopropyl)-2-oxo-3-phenylindoline-1-carboxylate (**3a**)

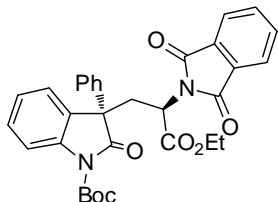

Prepared according to the general procedure from **1a** (0.24 mmol), **2** (0.2 mmol), toluene (1 mL) at rt for 10 h to provide the title compound as a white solid (93% yield, 94% ee, 91:9 dr). <sup>1</sup>H NMR (400 MHz, CDCl<sub>3</sub>) δ (ppm) 7.68 – 7.54 (m, 5H), 7.34 (d, *J* = 8.2 Hz, 2H), 7.22 (t, *J* = 7.5 Hz, 2H), 7.17 – 7.11 (m, 2H), 6.77-6.66 (m, 2H), 5.03 (dd, *J* = 10.1 Hz, 4.8, 1H), 4.18 (q, *J* = 7.1 Hz, 2H), 3.44 – 3.30 (m, 2H), 1.69 (s, 9H), 1.19 (t, *J* = 7.1 Hz, 3H). <sup>13</sup>C NMR (100 MHz, CDCl<sub>3</sub>) δ (ppm) 175.78, 168.19, 166.66, 148.94, 139.19, 133.56, 131.25, 129.14, 128.49, 127.56, 126.55, 124.37, 123.94, 122.80, 115.53, 84.26, 62.09, 54.83, 48.75, 34.99, 27.95, 13.94. Calcd for C<sub>32</sub>H<sub>30</sub>N<sub>2</sub>O<sub>7</sub> [M+Na]: 577.1945. Found: 577.1952. [α]<sub>D</sub><sup>25</sup> = -36.56 (C = 1.02, CHCl<sub>3</sub>). HPLC (Chiralpak AD-H column, hexane/2-propanol = 95:5, 0.7 mL/min; 254 nm, 25 °C, t<sub>1</sub> = 35.30 min, t<sub>2</sub> = 46.65 min, t<sub>3</sub> = 50.42 min, t<sub>4</sub> = 70.33 min).

#### *tert*-butyl 3-(2-(1,3-dioxoisindolin-2-yl)-3-ethoxy-3-oxopropyl)-5-methyl-2-oxo-3-phenylindoline-1-carboxylate (**3b**)

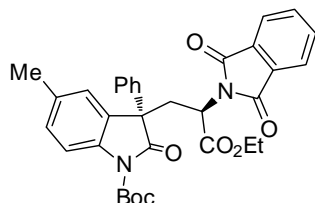

Prepared according to the general procedure from **1b** (0.24 mmol), **2** (0.2 mmol), toluene (1 mL) at rt for 10 h to provide the title compound as a white solid (90% yield, 93% ee, 89:11 dr). <sup>1</sup>H NMR (600 MHz, CDCl<sub>3</sub>) δ (ppm) 7.62 (d, *J* = 6.5 Hz, 4H), 7.51 (d, *J* = 8.3 Hz, 1H), 7.33 (d, *J* = 7.8 Hz, 2H), 7.25 (t, *J* = 7.5 Hz, 2H), 7.19 (t, *J* = 7.1 Hz, 1H), 6.83 (s, 1H), 6.47 (d, *J* = 8.3 Hz, 1H), 4.97 (d, *J* = 11.9 Hz, 1H), 4.19 (q, *J* = 7.0 Hz, 2H), 3.51 – 3.24 (m, 2H), 1.85 (s, 3H), 1.69 (s, 9H), 1.20 (t, *J* = 7.0 Hz, 3H). <sup>13</sup>C NMR (150 MHz, CDCl<sub>3</sub>) δ (ppm) 176.00, 168.22, 166.54, 149.01, 139.61, 136.97, 133.54, 131.22, 129.16, 128.52, 128.17, 127.53, 126.49, 124.83, 122.66, 115.55, 84.12, 62.08, 55.01, 48.82, 34.65, 27.98, 20.45, 13.93. Calcd for C<sub>33</sub>H<sub>32</sub>N<sub>2</sub>O<sub>7</sub> [M+Na]: 591.2102. Found: 591.2104. [α]<sub>D</sub><sup>18</sup> = -19.21 (C = 0.95, CHCl<sub>3</sub>). HPLC (Chiralpak AD-H column, hexane/2-propanol = 95:5, 0.7 mL/min; 254 nm, 25 °C, t<sub>1</sub> = 35.87 min, t<sub>2</sub> = 38.56 min, t<sub>3</sub> = 44.00 min, t<sub>4</sub> = 56.33 min).

#### *tert*-butyl 3-(2-(1,3-dioxoisindolin-2-yl)-3-ethoxy-3-oxopropyl)-5-fluoro-2-oxo-3-phenylindoline-1-carboxylate (**3c**)

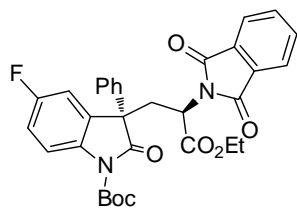

Prepared according to the general procedure from **1c** (0.24 mmol), **2** (0.2 mmol), toluene (1 mL) at rt for 2 h to provide the title compound as a white solid (96% yield, 96% ee, 91:9 dr). <sup>1</sup>H NMR (600 MHz, CDCl<sub>3</sub>) δ (ppm) 7.64 (d, *J* = 4.4 Hz, 5H), 7.31 (d, *J* = 8.0 Hz, 2H), 7.25 (t, *J* = 10.6 Hz, 2H), 7.18 (t, *J* = 7.2 Hz, 1H), 6.87 – 6.82 (m, 1H), 6.39 (t, *J* = 8.8 Hz, 1H), 5.00 (dd, *J*<sub>1</sub> = 11.6 Hz, *J*<sub>2</sub> = 3.0 Hz, 1H), 4.19 (q, *J* = 7.0 Hz, 2H), 3.46 – 3.29 (m, 2H), 1.68 (s, 9H), 1.21 (t, *J* = 7.1 Hz, 3H). <sup>13</sup>C NMR (150

MHz, CDCl<sub>3</sub>)  $\delta$  (ppm) 175.33, 168.07, 166.70, 159.97, 158.34, 148.95, 138.74, 135.28, 133.81, 131.20, 128.71, 127.81, 126.40, 122.93, 117.09, 114.18, 112.00, 111.83, 84.56, 62.22, 55.17, 48.69, 34.88, 27.99, 13.98. Calcd for C<sub>32</sub>H<sub>29</sub>FN<sub>2</sub>O<sub>7</sub> [M+Na]: 595.1851. Found: 595.1842. [ $\alpha$ ]<sub>D</sub><sup>16</sup> = -32.84 (C = 0.98, CHCl<sub>3</sub>). HPLC (Chiralpak AD-H column, hexane/2-propanol = 95:5, 0.7 mL/min; 254 nm, 25 °C, t<sub>1</sub> = 28.28 min, t<sub>2</sub> = 37.62 min, t<sub>3</sub> = 42.13 min, t<sub>4</sub> = 46.91 min).

***tert*-butyl 5-bromo-3-(2-(1,3-dioxoisindolin-2-yl)-3-ethoxy-3-oxopropyl)-2-oxo-3-phenylindoline-1-carboxylate (3d)**

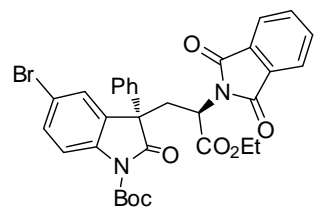

Prepared according to the general procedure from **1d** (0.24 mmol), **2** (0.2 mmol), toluene (1 mL) at rt for 2 h to provide the title compound as a white solid (94% yield, 97% ee, 89:11 dr). <sup>1</sup>H NMR (600 MHz, CDCl<sub>3</sub>)  $\delta$  (ppm) 7.66 (s, 4H), 7.54 (d, *J* = 8.8 Hz, 1H), 7.28 (d, *J* = 7.5 Hz, 5H), 7.22 (d, *J* = 6.9 Hz, 1H), 7.16 (s, 1H), 6.79 (d, *J* = 8.8 Hz, 1H), 4.95 (d, *J* = 12.0 Hz, 1H), 4.24 – 4.14 (m, 2H), 3.46 – 3.27 (m, 2H), 1.68 (s, 9H), 1.21 (t, *J* = 6.6 Hz, 3H). <sup>13</sup>C NMR (150 MHz, CDCl<sub>3</sub>)  $\delta$  (ppm) 174.96, 168.04, 166.69, 148.83, 138.85, 138.44, 133.83, 131.59, 131.00, 130.62, 128.79, 127.91, 127.36, 126.39, 123.10, 117.31, 84.76, 62.23, 55.03, 48.59, 28.42, 28.99, 13.84. Calcd for C<sub>32</sub>H<sub>29</sub>BrN<sub>2</sub>O<sub>7</sub> [M+Na]: 655.1050. Found: 655.1065. [ $\alpha$ ]<sub>D</sub><sup>20</sup> = -13.65 (C = 0.98, CHCl<sub>3</sub>). HPLC (Chiralpak AD-H column, hexane/2-propanol = 95:5, 0.7 mL/min; 254 nm, 25 °C, t<sub>1</sub> = 31.26 min, t<sub>2</sub> = 36.56 min, t<sub>3</sub> = 39.23 min, t<sub>4</sub> = 79.57 min).

***tert*-butyl 3-(2-(1,3-dioxoisindolin-2-yl)-3-ethoxy-3-oxopropyl)-2-oxo-3-phenyl-5-(trifluoromethoxy)indoline-1-carboxylate (3e)**

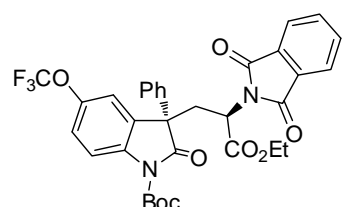

Prepared according to the general procedure from **1e** (0.24 mmol), **2** (0.2 mmol), toluene (1 mL) at rt for 2 h to provide the title compound as a white solid (94% yield, 97% ee, 91:9 dr). <sup>1</sup>H NMR (600 MHz, CDCl<sub>3</sub>)  $\delta$  (ppm) 7.71 (d, *J* = 8.9 Hz, 1H), 7.63 (d, *J* = 2.7 Hz, 4H), 7.32 – 7.23 (m, 4H), 7.19 (t, *J* = 7.1 Hz, 1H), 7.03 (s, 1H), 6.64 (d, *J*<sub>1</sub> = 8.9 Hz, 1H), 5.01 (dd, *J*<sub>1</sub> = 11.7 Hz, *J*<sub>2</sub> = 2.9 Hz, 1H), 4.18 (dd, *J*<sub>1</sub> = 6.7 Hz, *J*<sub>2</sub> = 4.0 Hz, 2H), 3.48 – 3.31 (m, 2H), 1.69 (s, 9H), 1.19 (t, *J* = 7.0, 3H). <sup>13</sup>C NMR (150 MHz, CDCl<sub>3</sub>)  $\delta$  (ppm) 175.11, 168.02, 166.72, 148.82, 145.33, 138.58, 137.76, 133.84, 131.26, 131.02, 128.77, 127.89, 126.38, 123.01, 120.89, 120.11, 119.18, 117.54, 116.65, 84.81, 62.24, 55.10, 48.73, 35.22, 27.95, 13.95. Calcd for C<sub>33</sub>H<sub>29</sub>F<sub>3</sub>N<sub>2</sub>O<sub>8</sub> [M+Na]: 661.1768. Found: 661.1754. [ $\alpha$ ]<sub>D</sub><sup>16</sup> = -35.33 (C = 1.00, CHCl<sub>3</sub>). HPLC (Chiralpak AD-H column, hexane/2-propanol = 90:10, 1.0 mL/min; 254 nm, 25 °C, t<sub>1</sub> = 7.88 min, t<sub>2</sub> = 10.50 min).

***tert*-butyl 6-chloro-3-(2-(1,3-dioxoisindolin-2-yl)-3-ethoxy-3-oxopropyl)-2-oxo-3-phenylindoline-1-carboxylate (3f)**

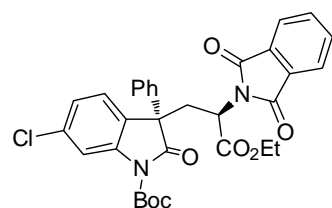

Prepared according to the general procedure from **1f** (0.24 mmol), **2** (0.2 mmol), toluene (1 mL) at rt for 2 h to provide the title compound as a white solid (93% yield, 97% ee, 92:8 dr). <sup>1</sup>H NMR (600 MHz, CDCl<sub>3</sub>)  $\delta$  (ppm) 7.74

(s, 1H), 7.65 (t,  $J = 6.8$  Hz, 4H), 7.30 (d,  $J = 8.1$  Hz, 2H), 7.24 (t,  $J = 7.5$  Hz, 2H), 7.18 (t,  $J = 7.2$  Hz, 1H), 7.03 (d,  $J = 8.0$  Hz, 1H), 6.65 (d,  $J = 8.0$  Hz, 1H), 4.99 (dd,  $J_1 = 11.9$  Hz,  $J_2 = 1.9$  Hz, 1H), 4.18 (q,  $J = 7.0$  Hz, 2H), 3.45 – 3.25 (m, 2H), 1.69 (s, 9H), 1.20 (t,  $J = 7.1$  Hz, 3H).  $^{13}\text{C}$  NMR (150 MHz,  $\text{CDCl}_3$ )  $\delta$  (ppm) 175.22, 168.05, 166.75, 148.77, 140.22, 138.80, 133.95, 131.13, 128.68, 127.76, 126.45, 125.23, 124.07, 122.95, 116.26, 84.86, 77.20, 76.99, 76.77, 62.20, 54.68, 48.70, 34.95, 27.96, 13.97. Calcd for  $\text{C}_{32}\text{H}_{29}\text{ClN}_2\text{O}_7$   $[\text{M}+\text{Na}]$ : 611.1555. Found: 611.1552.  $[\alpha]_{\text{D}}^{25} = -55.12$  ( $C = 0.99$ ,  $\text{CHCl}_3$ ). HPLC (Chiralpak AD-H column, hexane/2-propanol = 90:10, 1.0 mL/min; 254 nm, 25 °C,  $t_1 = 7.98$  min,  $t_2 = 11.12$  min,  $t_3 = 14.24$  min,  $t_4 = 18.84$  min).

***tert*-butyl 6-bromo-3-(2-(1,3-dioxoisindolin-2-yl)-3-ethoxy-3-oxopropyl)-2-oxo-3-phenylindoline-1-carboxylate (3g)**

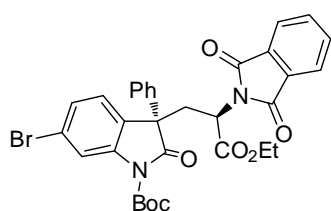

Prepared according to the general procedure from **1g** (0.24 mmol), **2** (0.2 mmol), toluene (1 mL) at rt for 2 h to provide the title compound as a white solid (94% yield, 96% ee, 90:10 dr).  $^1\text{H}$  NMR (600 MHz,  $\text{CDCl}_3$ )  $\delta$  (ppm) 7.89 (d,  $J = 1.5$  Hz, 1H), 7.70 – 7.62 (m, 4H), 7.29 (d,  $J = 7.7$  Hz, 2H), 7.25 (t,  $J = 7.7$  Hz, 2H), 7.19 (t,  $J = 7.2$  Hz, 1H), 6.96 (d,  $J = 8.0$  Hz, 1H), 6.80 (dd,  $J_1 = 8.0$  Hz,  $J_2 = 1.5$  Hz, 1H), 4.98 (dd,  $J_1 = 12.1$  Hz,  $J_2 = 3.0$  Hz, 1H), 4.18 (q,  $J = 7.1$  Hz, 2H), 3.29–3.41 (m, 2H), 1.69 (s, 9H), 1.20 (t,  $J = 7.1$  Hz, 3H).  $^{13}\text{C}$  NMR (150 MHz,  $\text{CDCl}_3$ )  $\delta$  (ppm) 175.11, 168.06, 166.77, 148.79, 140.40, 138.81, 134.11, 131.17, 128.71, 128.35, 127.83, 127.06, 126.45, 125.56, 122.99, 121.79, 119.04, 84.88, 62.21, 54.78, 48.74, 34.90, 27.99, 13.99. Calcd for  $\text{C}_{32}\text{H}_{29}\text{BrN}_2\text{O}_7$   $[\text{M}+\text{Na}]$ : 655.1050. Found: 655.1065.  $[\alpha]_{\text{D}}^{20} = -50.95$  ( $C = 0.99$ ,  $\text{CHCl}_3$ ). HPLC (Chiralpak AD-H column, hexane/2-propanol = 90:10, 1.0 mL/min; 254 nm, 25 °C,  $t_1 = 8.05$  min,  $t_2 = 11.71$  min,  $t_3 = 14.80$  min,  $t_4 = 20.85$  min).

***tert*-butyl 3-(2-(1,3-dioxoisindolin-2-yl)-3-ethoxy-3-oxopropyl)-7-fluoro-2-oxo-3-phenylindoline-1-carboxylate (3h)**

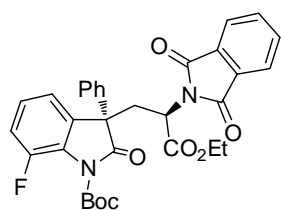

Prepared according to the general procedure from **1h** (0.24 mmol), **2** (0.2 mmol), toluene (1 mL) at rt for 2 h to provide the title compound as a white solid (95% yield, 95% ee, 93:7 dr).  $^1\text{H}$  NMR (600 MHz,  $\text{CDCl}_3$ )  $\delta$  (ppm) 7.74 (s, 1H), 7.64 (s, 4H), 7.32 (d,  $J = 7.8$  Hz, 2H), 7.19 (t,  $J = 7.8$  Hz, 2H), 7.14 – 7.02 (m, 2H), 6.70–6.74 (m, 1H), 6.68 – 6.59 (m, 1H), 5.02 (dd,  $J_1 = 11.7$  Hz,  $J_2 = 2.9$  Hz, 1H), 4.18 (q,  $J = 7.0$  Hz, 2H), 3.33–3.41 (m, 2H), 1.63 (s, 9H), 1.20 (t,  $J = 7.1$  Hz, 3H).  $^{13}\text{C}$  NMR (150 MHz,  $\text{CDCl}_3$ )  $\delta$  (ppm) 175.07, 168.12, 166.67, 149.31, 147.64, 147.04, 138.23, 133.78, 132.25, 131.29, 128.58, 127.66, 126.36, 124.90, 122.90, 120.62, 116.27, 116.13, 84.91, 62.24, 55.51, 48.76, 35.16, 27.61, 13.96. Calcd for  $\text{C}_{32}\text{H}_{29}\text{FN}_2\text{O}_7$   $[\text{M}]$ : 595.1851. Found: 595.1842.  $[\alpha]_{\text{D}}^{20} = -77.30$  ( $C = 1.01$ ,  $\text{CHCl}_3$ ). HPLC (Chiralpak AD-H column, hexane/2-propanol = 90:10, 1.0 mL/min; 254 nm, 25 °C,  $t_1 = 23.81$  min,  $t_2 = 26.66$  min,  $t_3 = 33.67$  min,  $t_4 = 49.85$  min).

***tert*-butyl 3-(2-(1,3-dioxoisindolin-2-yl)-3-ethoxy-3-oxopropyl)-3-(4-fluorophenyl)-2-oxoindoline-1-carboxylate (3i)**

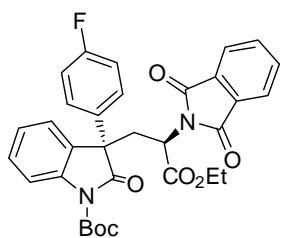

Prepared according to the general procedure from **1i** (0.24 mmol), **2** (0.2 mmol), toluene (1 mL) at rt for 10 h to provide the title compound as a white solid (94% yield, > 99% ee, 90:10 dr). <sup>1</sup>H NMR (400 MHz, CDCl<sub>3</sub>) δ (ppm) 7.67 – 7.57 (m, 6H), 7.42 – 7.10 (m, 3H), 7.05 – 6.62 (m, 5H), 5.00 (dd, *J* = 8.7, 6.4 Hz, 1H), 4.18 (q, *J* = 7.1 Hz, 3H), 3.36 – 3.30 (m, 2H), 1.69 (s, 10H), 1.20 (t, *J* = 7.1 Hz, 3H).

<sup>13</sup>C NMR (100 MHz, CDCl<sub>3</sub>) δ (ppm) 175.71, 168.17, 166.73, 163.28, 160.82, 148.93, 139.30, 134.79, 133.68, 131.29, 128.84, 128.55, 127.90, 124.46, 124.09, 122.90, 115.71, 115.43, 115.21, 84.50, 62.22, 54.30, 48.75, 35.37, 28.00, 13.98. Calcd for C<sub>33</sub>H<sub>32</sub>N<sub>2</sub>O<sub>7</sub> [M<sup>+</sup>]: 572.1959. Found: 572.1960. [ $\alpha$ ]<sub>D</sub><sup>16</sup> = -70.47 (C = 1.02, CHCl<sub>3</sub>). HPLC (Chiralpak OD-H column, hexane/2-propanol = 90:10, 1.0 mL/min; 254 nm, 25 °C, *t*<sub>1</sub> = 12.36 min, *t*<sub>2</sub> = 13.32 min, *t*<sub>3</sub> = 15.64 min, *t*<sub>4</sub> = 24.12 min).

***tert*-butyl 3-(2-(1,3-dioxoisindolin-2-yl)-3-ethoxy-3-oxopropyl)-2-oxo-3-(*p*-tolyl)indoline-1-carboxylate (3j)**

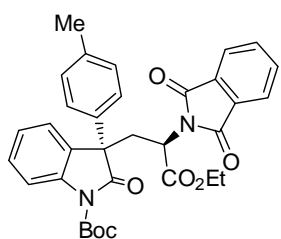

Prepared according to the general procedure from **1j** (0.24 mmol), **2** (0.2 mmol), toluene (1 mL) at rt for 10 h to provide the title compound as a white solid (94% yield, 94% ee, 89:11 dr). <sup>1</sup>H NMR (400 MHz, CDCl<sub>3</sub>) δ (ppm) 7.52 (s, 4H), 7.08–7.14 (m, 4H), 6.93 (d, *J* = 7.9 Hz, 2H), 6.59–6.69 (m, 2H), 4.94 (t, *J* = 7.5 Hz, 1H), 4.09 (q, *J* = 7.1 Hz, 2H), 3.27 (d, *J* = 7.5 Hz, 2H), 2.10 (s, 3H), 1.60 (s, 10H), 1.11

(t, *J* = 7.1 Hz, 4H). <sup>13</sup>C NMR (100 MHz, CDCl<sub>3</sub>) δ (ppm) 175.90, 168.26, 166.72, 149.05, 139.26, 137.38, 136.12, 133.54, 131.34, 129.18, 127.60, 126.49, 124.43, 123.95, 123.40, 122.83, 115.53, 84.22, 62.11, 54.54, 48.82, 35.00, 27.98, 20.73, 13.97. Calcd for C<sub>33</sub>H<sub>32</sub>N<sub>2</sub>O<sub>7</sub> [M+Na]: 591.2102. Found: 591.2090. [ $\alpha$ ]<sub>D</sub><sup>16</sup> = -55.55 (C = 1.00, CHCl<sub>3</sub>). HPLC (Chiralpak OD-H column, hexane/2-propanol = 90:10, 1.0 mL/min; 254 nm, 25 °C, *t*<sub>1</sub> = 8.86 min, *t*<sub>2</sub> = 10.36 min, *t*<sub>3</sub> = 11.67 min).

***tert*-butyl 3-(2-(1,3-dioxoisindolin-2-yl)-3-ethoxy-3-oxopropyl)-3-(naphthalen-2-yl)-2-oxoindoline-1-carboxylate (3k)**

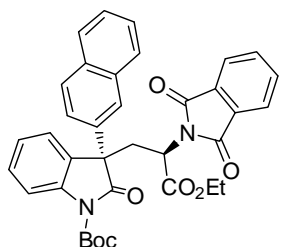

Prepared according to the general procedure from **1k** (0.24 mmol), **2** (0.2 mmol), toluene (1 mL) at rt for 10 h to provide the title compound as a white solid (94% yield, > 99% ee, 91:9 dr). <sup>1</sup>H NMR (400 MHz, CDCl<sub>3</sub>) δ (ppm) 7.63–7.77 (m, 6H), 7.57 – 7.44 (m, 5H), 7.43 – 7.33 (m, 2H), 7.29 (d, *J* = 7.2 Hz, 1H), 6.74–6.84 (m, 2H), 5.11 (dd, *J*<sub>1</sub> = 10.9 Hz, *J*<sub>2</sub> = 4.0 Hz, 1H), 4.19 (q, *J* = 7.1 Hz, 2H), 3.60 – 3.39 (m, 2H), 1.69 (s, 9H), 1.20 (t, *J* = 7.1 Hz, 3H). <sup>13</sup>C NMR (100 MHz, CDCl<sub>3</sub>) δ

(ppm) 175.74, 168.23, 166.69, 148.94, 139.24, 136.18, 133.76, 132.70, 132.23, 131.10, 129.15, 128.37, 127.78, 127.11, 126.13, 125.67, 124.58, 124.08, 123.25, 122.66, 115.57, 84.33, 62.12, 54.89, 48.71, 34.81, 27.93, 13.93. Calcd for C<sub>36</sub>H<sub>32</sub>N<sub>2</sub>O<sub>7</sub> [M+Na]: 627.2102. Found: 627.2096. [ $\alpha$ ]<sub>D</sub><sup>18</sup> = -14.09 (C = 0.97,

CHCl<sub>3</sub>). HPLC (Chiralpak OD-H column, hexane/2-propanol = 90:10, 1.0 mL/min; 254 nm, 25 °C, *t*<sub>1</sub> = 14.08 min, *t*<sub>2</sub> = 17.51 min).

***tert*-butyl 3-benzyl-3-(2-(1,3-dioxoisindolin-2-yl)-3-ethoxy-3-oxopropyl)-2-oxoindoline-1-carboxylate (**3l**)**

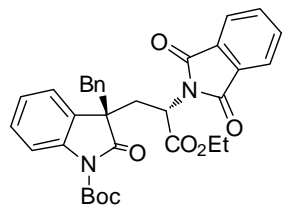

Prepared according to the general procedure from **1l** (0.24 mmol), **2** (0.2 mmol), toluene (1 mL) at rt for 48 h to provide the title compound as a light yellow oil (90% yield, 87% ee, 52:48 dr). <sup>1</sup>H NMR (400 MHz, CDCl<sub>3</sub>) δ (ppm) 7.80–7.82 (m, 2H), 7.70 – 7.73 (m, 2H), 7.59 (d, *J* = 8.0 Hz, 1H), 7.30 – 7.35 (m, 1H), 7.23–7.28 (m, 2H), 6.97–7.07 (m, 3H), 6.72 (d, *J* = 7.2 Hz, 2H), 4.37 (dd, *J* = 11.8, 2.2 Hz, 1H), 4.13 (m, 2H), 3.34 (dd, *J* = 14.7, 11.9 Hz, 1H), 3.14 (d, *J* = 12.8 Hz, 1H), 3.07 – 2.91 (m, 2H), 1.22 (s, 9H), 1.15 (t, *J* = 7.1 Hz, 3H). <sup>13</sup>C NMR (100 MHz, CDCl<sub>3</sub>) δ (ppm) 176.28, 168.61, 166.86, 148.10, 140.18, 134.00, 131.77, 129.89, 128.91, 127.58, 126.81, 124.37, 123.40, 123.12, 115.14, 83.13, 62.12, 53.13, 48.59, 46.13, 34.99, 27.57, 13.96. Calcd for C<sub>33</sub>H<sub>32</sub>N<sub>2</sub>O<sub>7</sub> [M+Na]: 591.2102. Found: 591.2106. [α]<sub>D</sub><sup>25</sup> = -58.10 (C = 0.98, CHCl<sub>3</sub>). HPLC (Chiralpak AD-H column, hexane/2-propanol = 90:10, 1.0 mL/min; 254 nm, 25 °C, *t*<sub>1</sub> = 10.35 min, *t*<sub>2</sub> = 14.93 min, *t*<sub>3</sub> = 17.20 min, *t*<sub>4</sub> = 24.51 min).

#### 4. Derivatizations of adduct **3a**.

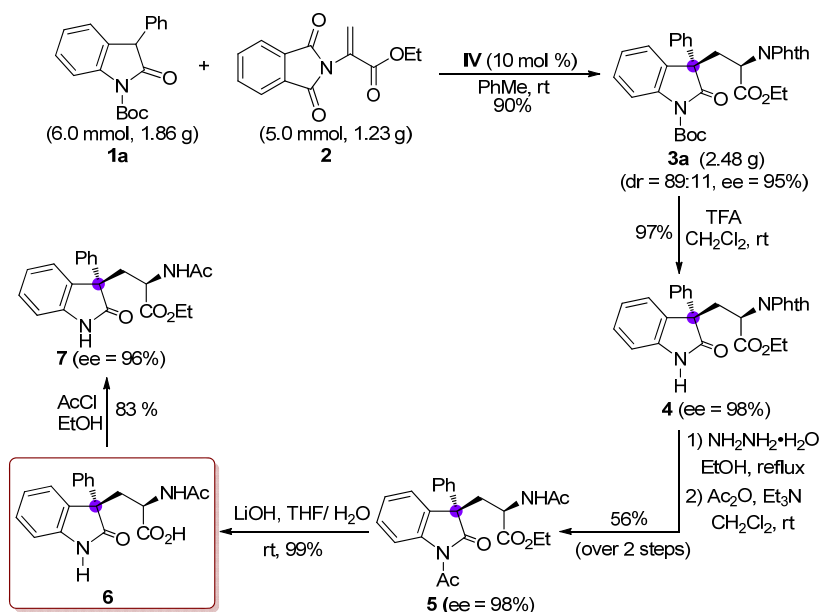

**Procedure:** A mixture of *tert*-butyl 2-oxo-3-phenylindoline-1-carboxylate **1a** (6.0 mmol, 1.86 g), **2** (5.0 mmol, 1.23 g) and catalyst **IV** (0.5 mmol) in toluene (25 mL) was stirred at room temperature for 10 h. The crude product was purified by flash chromatography on silica gel (petroleum ether/ethyl acetate 10:1~8:1) to give the desired product **3a** as a white solid. The two stereoisomers were separated by silica gel chromatography.

To a solution of **3a** (1.0 mmol) in CH<sub>2</sub>Cl<sub>2</sub> (20 mL) was added TFA (5.0 mmol) at rt. The mixture was stirred at the same temperature for 4 h. It was then diluted with DCM and washed with sat. Na<sub>2</sub>CO<sub>3</sub>. The

aqueous phase was extracted with CH<sub>2</sub>Cl<sub>2</sub> and the combined organic phase was dried over Na<sub>2</sub>SO<sub>4</sub>. Then the crude product was purified by flash silica gel chromatography to afford the product **4** as white solid in 97 % yield with 98% ee.

Hydrazinemonohydrate (20 mmol, 20.0 equiv) was added to a solution of **4** (1.0 mmol, 1 equiv) in a ethanol (5mL) at 23 °C and the mixture was heated to reflux. The resulting white suspension was filtered, and were concentrated under reduced pressure to afford the crude primary amine as a yellow oil. The yellow residue was dissolved in dichloromethane (5 mL) at 23 °C. Triethylamine (10.0 mmol, 10.0 equiv) was added followed by Ac<sub>2</sub>O (10.0 mmol, 10.0 equiv). After 24 h, the reaction mixture was concentrated under reduced pressure and the residue was purified by flash column chromatography on silica gel (eluent: acetone/ petroleum ether) to afford the product **5** as a white solid (56% for 2 steps).

To a solution of **5** (1.0 mmol) in a mixture of THF (5 mL) and H<sub>2</sub>O was added LiOH·H<sub>2</sub>O (10.0 mmol) at rt. The mixture was stirred at the same temperature for 4 h. It was then acidified with 2N HCl. The aqueous phase was extracted with CH<sub>2</sub>Cl<sub>2</sub> and the combined organic phase was dried over Na<sub>2</sub>SO<sub>4</sub> to give **6** as a white solid in 99 % yield.

In order to confirm the stereoselectivity of compound **6**, the esterification was conducted with AcCl in distd. EtOH under reflux. To a stirred solution of **6** (0.3 mmol) in distd. EtOH (15 mL) AcCl (3.0 mmol) was added dropwise at rt. The mixture was heated to reflux for 2h and the reaction mixture was concentrated under reduced pressure and the residue was purified by flash column chromatography on silica gel (eluent: acetone/ petroleum ether) to afford the product **7** as a white solid (83% isolated yield).

**(R)-ethyl 2-(1,3-dioxoisindolin-2-yl)-3-((S)-2-oxo-3-phenylindolin-3-yl)propanoate(4)**

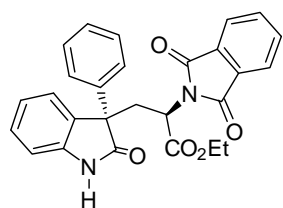

<sup>1</sup>H NMR (400 MHz, CDCl<sub>3</sub>) δ (ppm) 9.43 (s, 1H), 7.68 – 7.57 (m, 4H), 7.48 – 7.38 (m, 2H), 7.33 – 7.01 (m, 4H), 6.50 – 6.78 (m, 3H), 5.16 (dd, *J*<sub>1</sub> = 12.1, *J*<sub>2</sub> = 2.4, 1H), 4.18 (q, *J* = 6.8, 2H), 3.60 – 3.25 (m, 2H), 1.19 (t, *J* = 7.1, 3H). <sup>13</sup>C

NMR (100 MHz, CDCl<sub>3</sub>) δ (ppm) 179.88, 168.50, 167.00, 140.61, 139.21, 133.60, 131.23, 128.45, 127.50, 127.35, 126.36, 124.57, 122.83, 122.05, 110.59, 62.10, 55.16, 49.16, 34.23, 13.95. Calcd for C<sub>27</sub>H<sub>22</sub>N<sub>2</sub>O<sub>5</sub> [M+K]: 493.1166. Found: 493.1146. [ $\alpha$ ]<sub>D</sub><sup>20</sup> = -67.33 (C = 1.00, CHCl<sub>3</sub>). HPLC (Chiralpak OD-H column, hexane/2-propanol = 70:30, 1.0 mL/min; 254 nm, 25 °C, *t*<sub>1</sub> = 10.16 min, *t*<sub>2</sub> = 15.92 min).

**(R)-ethyl 2-amino-3-((S)-2-oxo-3-phenylindolin-3-yl)propanoate (5)**

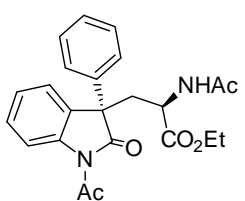

<sup>1</sup>H NMR (400 MHz, CDCl<sub>3</sub>) δ (ppm) 8.33 (d, *J* = 7.9 Hz, 1H), 7.46 – 7.40 (m, 2H), 7.30 (q, *J* = 8.5 Hz, 7H), 5.82 (d, *J* = 8.2 Hz, 1H), 4.71 (dd, *J* = 14.4, 7.6 Hz, 1H), 4.18 – 4.11 (m, 1H), 4.02 – 3.93 (m, 1H), 3.11 (dd, *J* = 14.4, 6.1 Hz, 1H), 2.74 – 2.66 (m, 1H), 2.64 (s, 3H), 1.63 (s, 3H), 1.21 (t, *J* = 7.2 Hz, 3H). <sup>13</sup>C NMR (150

MHz, CDCl<sub>3</sub>)  $\delta$  (ppm) 178.20, 171.23, 170.85, 169.32, 140.18, 139.50, 130.00, 129.29, 128.81, 127.90, 126.47, 125.08, 116.92, 61.65, 54.76, 49.65, 39.30, 26.50, 22.51, 13.78. Calcd for C<sub>23</sub>H<sub>24</sub>N<sub>2</sub>O<sub>5</sub> [M+Na]: 431.1583. Found: 431.1567.  $[\alpha]_D^{21} = -51.49$  (C = 1.03, CHCl<sub>3</sub>). HPLC (Chiralpak AD-H column, hexane/2-propanol = 80:20, 1.0 mL/min; 254 nm, 25 °C,  $t_1$  = 9.84 min,  $t_2$  = 10.99 min,  $t_3$  = 13.24 min,  $t_4$  = 18.76 min).

**(R)-2-acetamido-3-((S)-2-oxo-3-phenylindolin-3-yl)propanoic acid (6)**

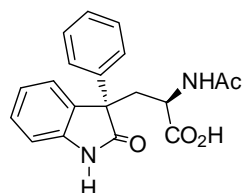

<sup>1</sup>H NMR (400 MHz, DMSO)  $\delta$  (ppm) 12.67 (s, 1H), 10.61 (s, 1H), 7.67 (d,  $J$  = 8.5 Hz, 1H), 7.41 – 7.27 (m, 5H), 7.27 – 7.15 (m, 2H), 7.00 (t,  $J$  = 7.5 Hz, 1H), 6.88 (d,  $J$  = 7.7 Hz, 1H), 4.25 – 4.06 (m, 1H), 2.66 (m, 2H), 1.34 (s, 3H). <sup>13</sup>C NMR (150 MHz, DMSO)  $\delta$  (ppm) 178.83, 173.40, 168.50, 142.00, 140.91, 131.62, 128.59, 128.09, 127.19, 126.50, 125.94, 121.46, 110.01, 55.47, 49.28, 37.47, 22.02. Calcd for C<sub>19</sub>H<sub>18</sub>N<sub>2</sub>O<sub>4</sub> [M+Na]: 361.1164. Found: 361.1141.  $[\alpha]_D^{22} = -24.36$  (C = 1.00, CH<sub>3</sub>OH).

**(R)-ethyl 2-acetamido-3-((S)-2-oxo-3-phenylindolin-3-yl)propanoate (7)**

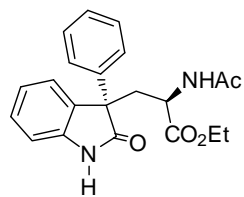

<sup>1</sup>H NMR (400 MHz, CDCl<sub>3</sub>)  $\delta$  (ppm) 9.71 (s, 1H), 7.46 – 7.38 (m, 2H), 7.35 – 7.26 (m, 3H), 7.25 – 7.18 (m, 2H), 7.08 (t,  $J$  = 7.5 Hz, 1H), 6.94 (d,  $J$  = 7.7 Hz, 1H), 6.24 (d,  $J$  = 8.3 Hz, 1H), 4.74 (m, 1H), 4.18 – 3.94 (m, 2H), 3.04 – 2.91 (m, 1H), 2.73 (dd,  $J$  = 14.4, 9.4 Hz, 1H), 1.53 (s, 3H), 1.20 (t,  $J$  = 7.1 Hz, 3H). <sup>13</sup>C NMR (150 MHz, CDCl<sub>3</sub>)  $\delta$  (ppm) 180.18, 171.82, 169.94, 141.25, 139.72, 131.64, 128.49, 127.42, 126.42, 125.27, 122.32, 110.63, 61.58, 55.13, 50.06, 38.06, 22.28, 13.88. Calcd for C<sub>21</sub>H<sub>22</sub>N<sub>2</sub>O<sub>4</sub> [M+Na]: 389.1477. Found: 389.1469.  $[\alpha]_D^{21} = -21.24$  (C = 1.00, CHCl<sub>3</sub>). HPLC (Chiralpak AD-H column, hexane/2-propanol = 70:30, 1.0 mL/min; 254 nm, 25 °C,  $t_1$  = 9.17 min,  $t_2$  = 17.60 min).

## 5. X-Ray structure of 3d.

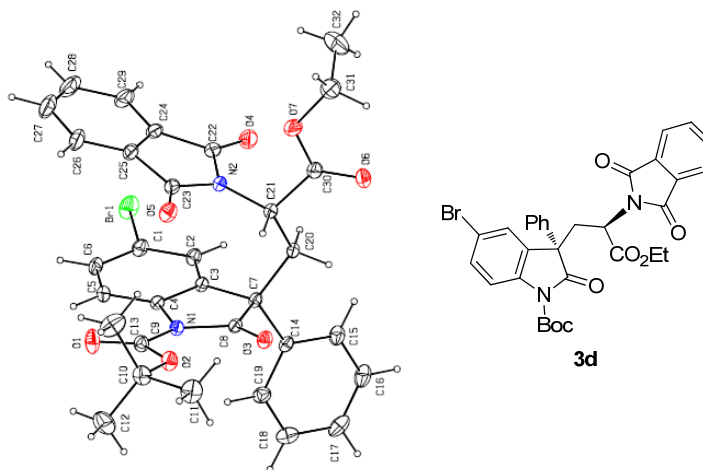

## 6. Copies of $^1\text{H}$ NMR and $^{13}\text{C}$ NMR Spectrums

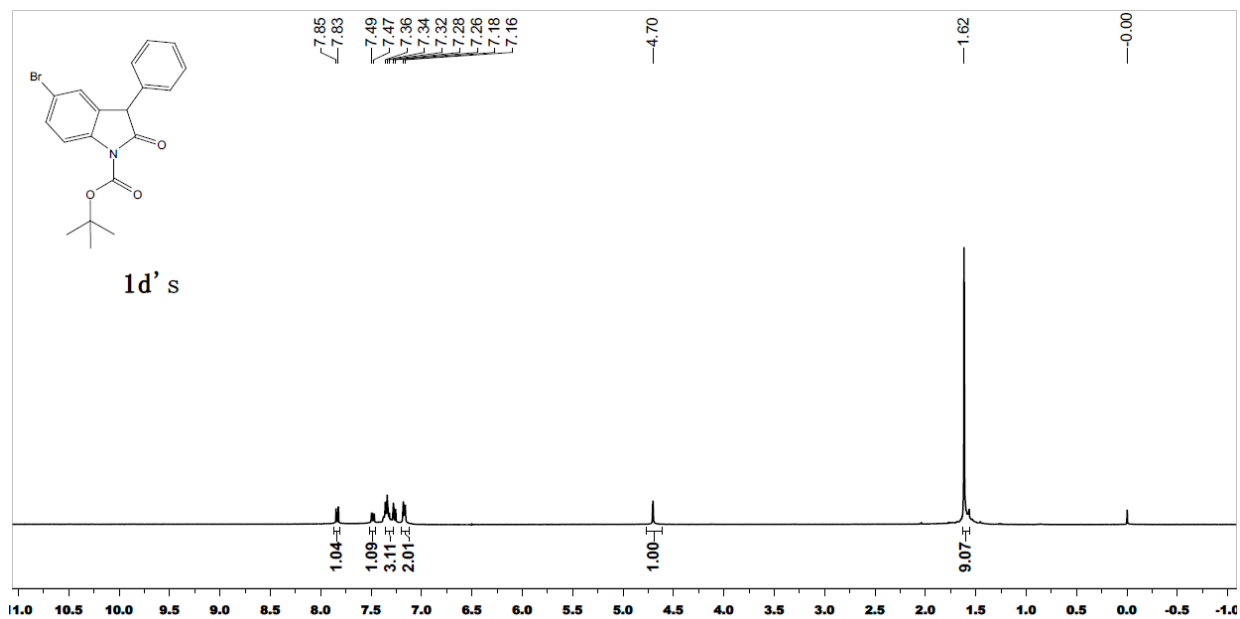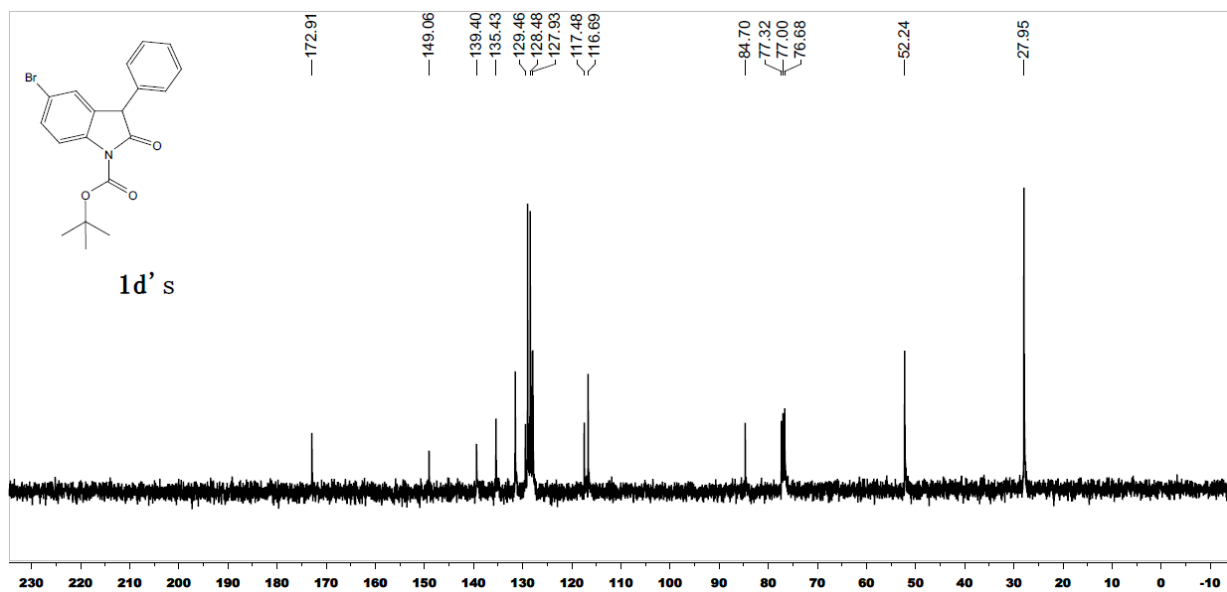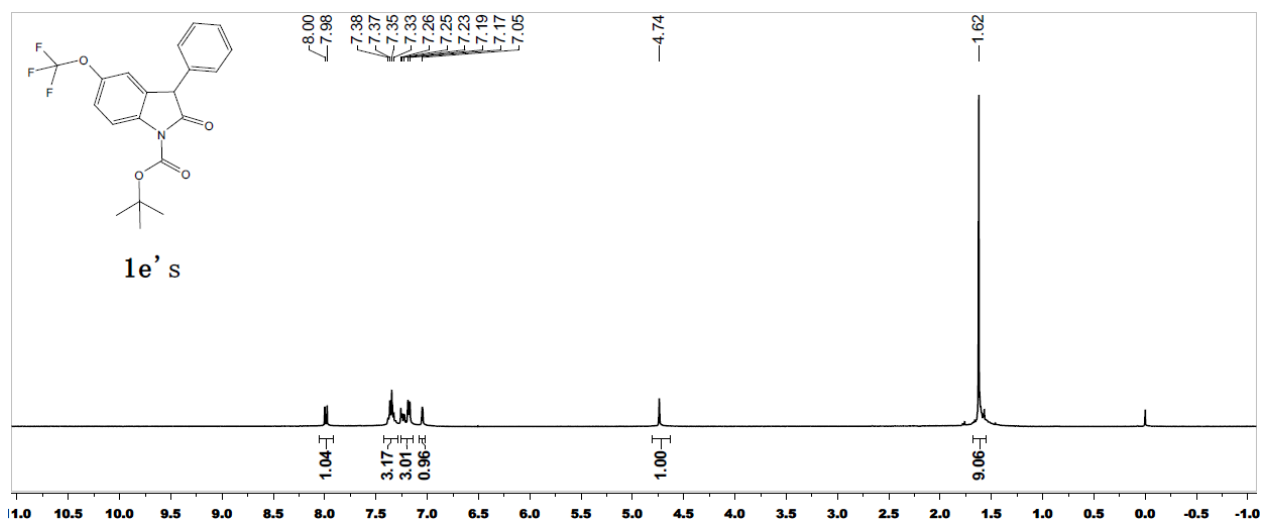

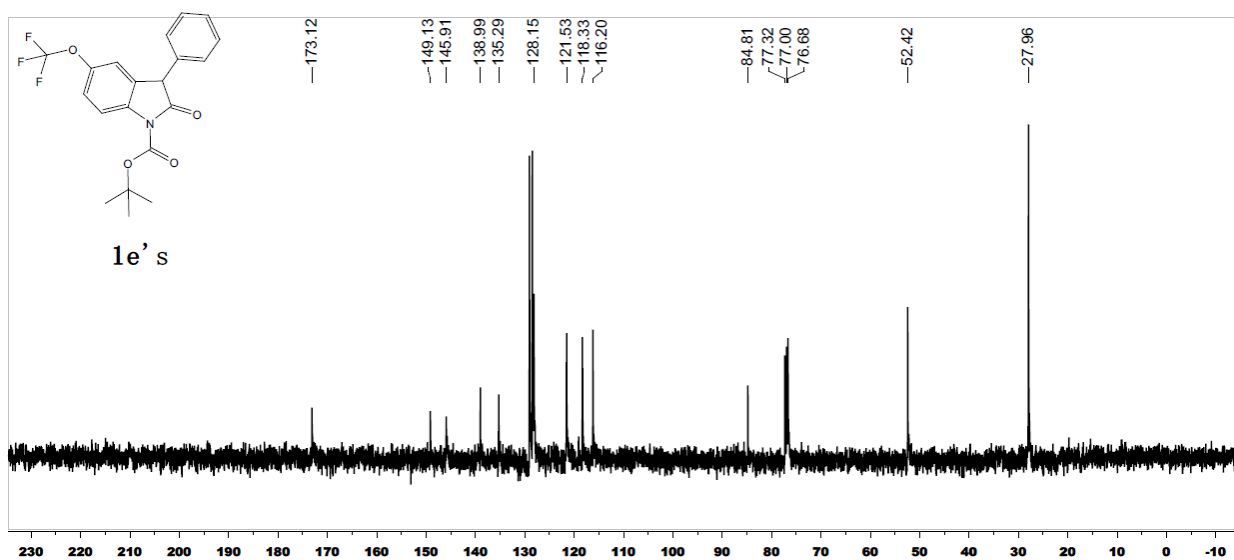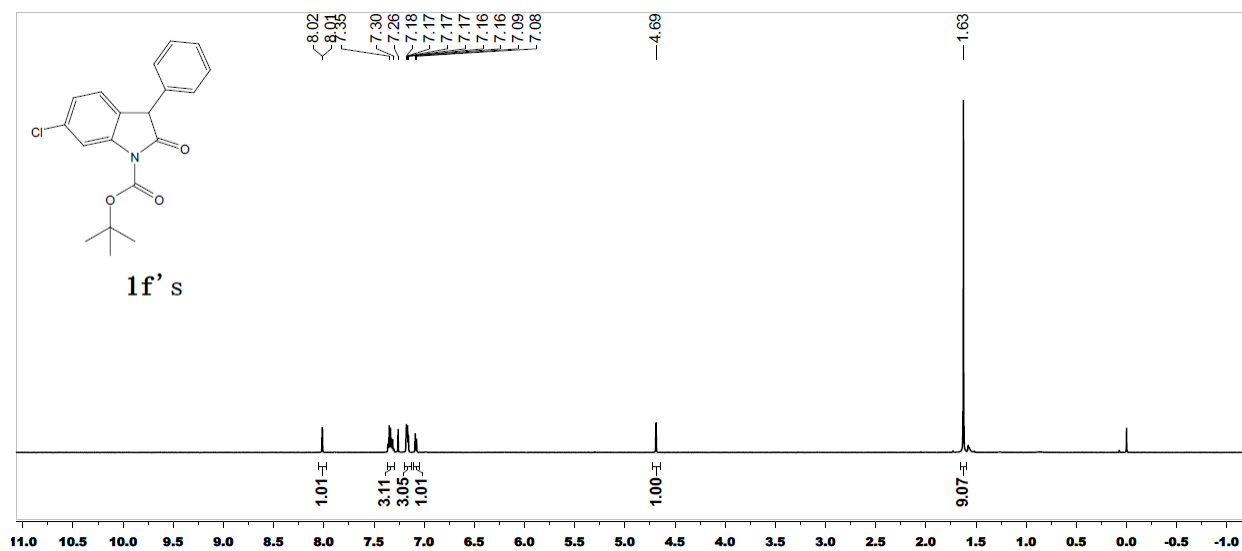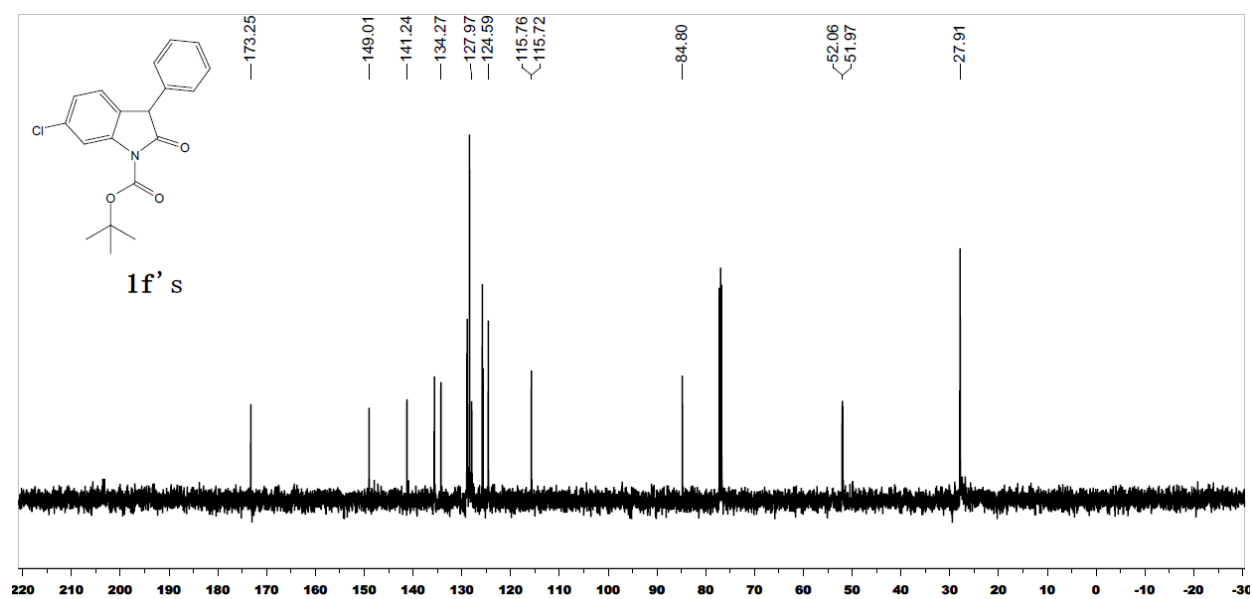

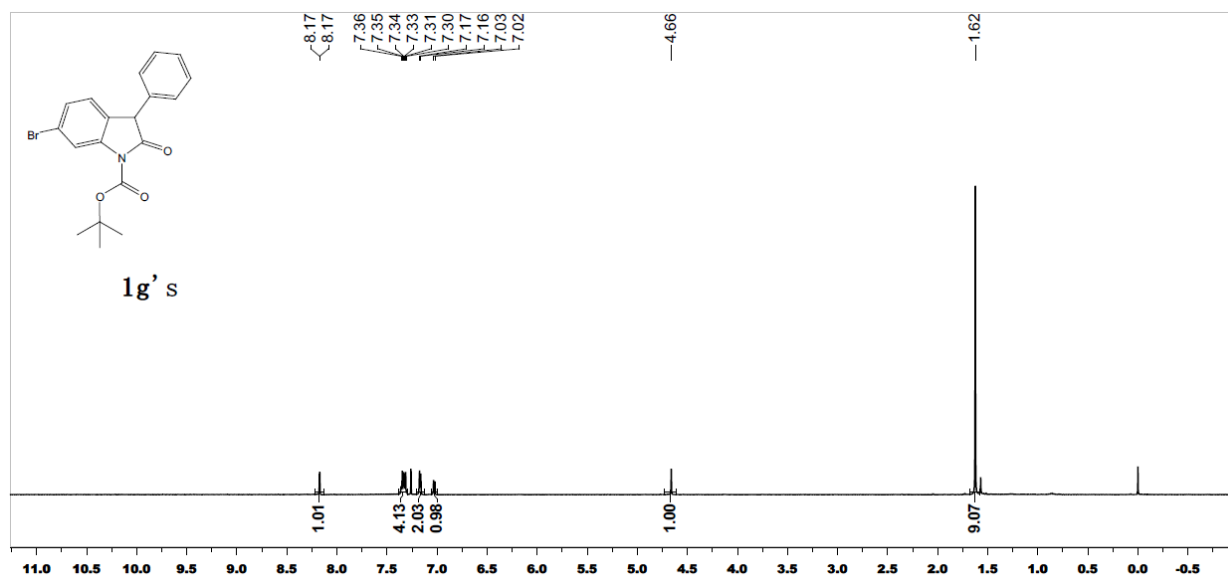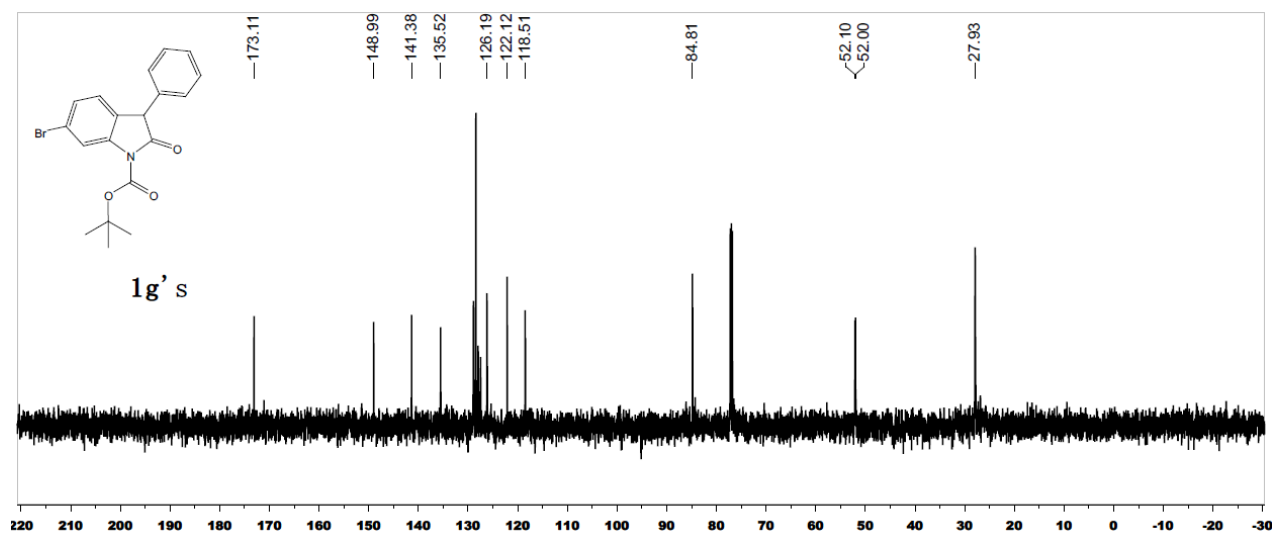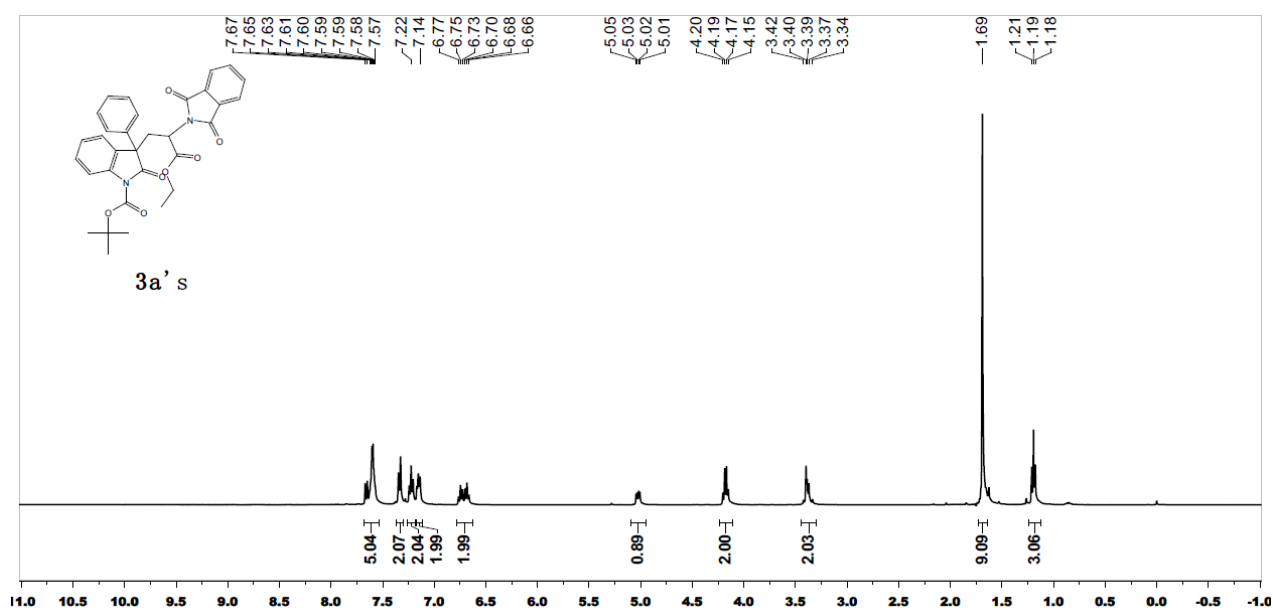

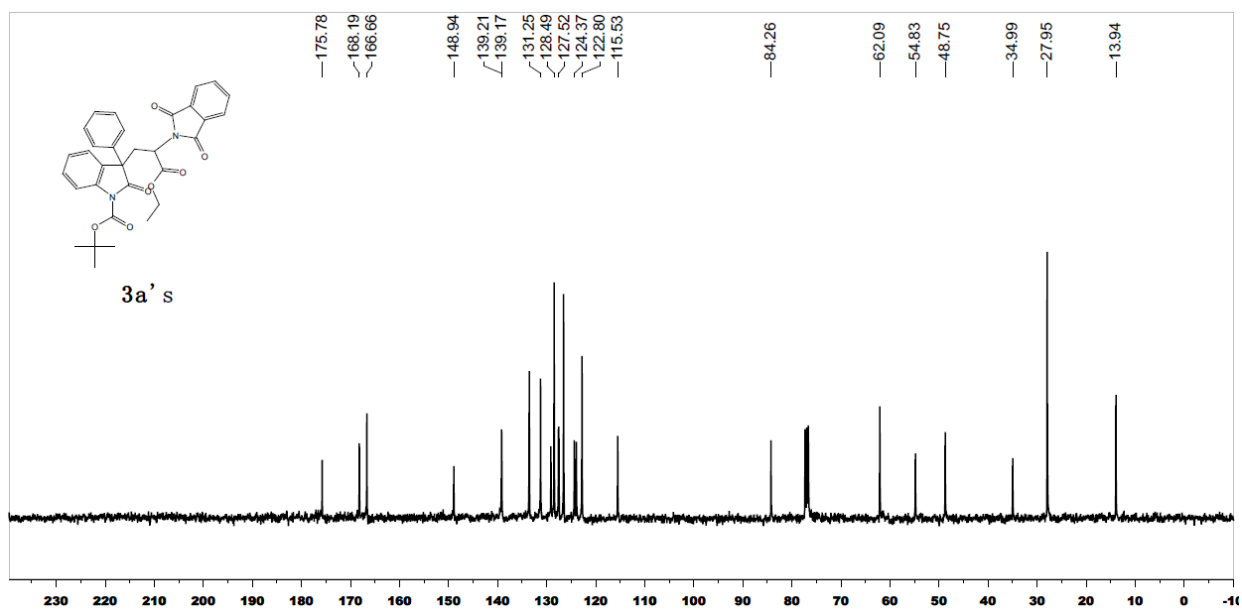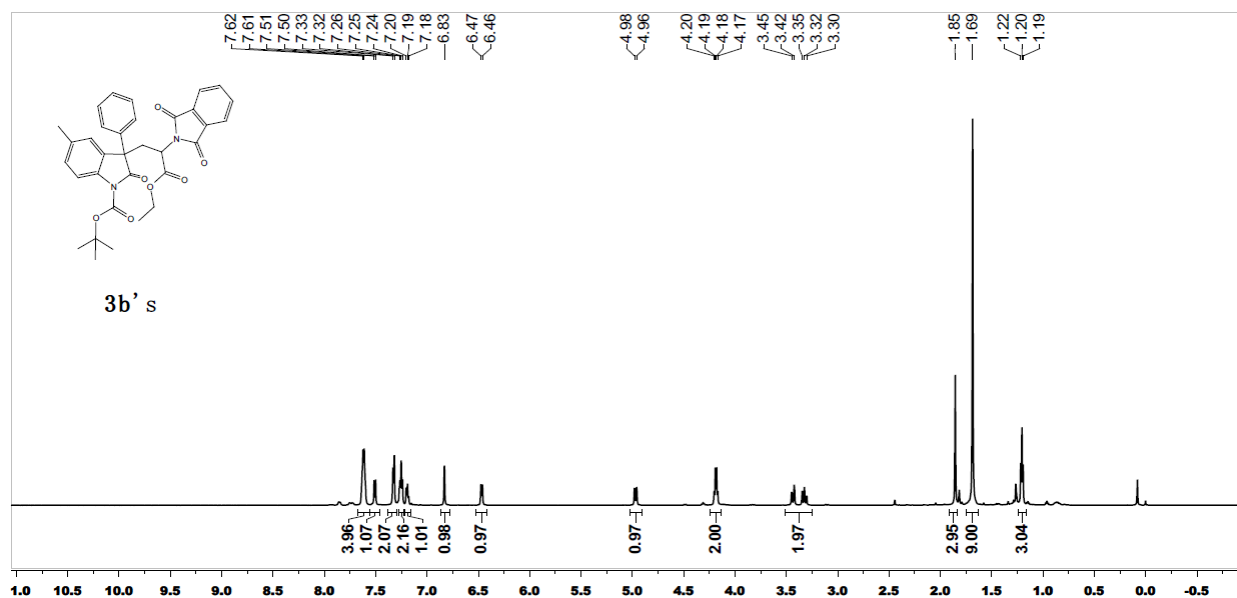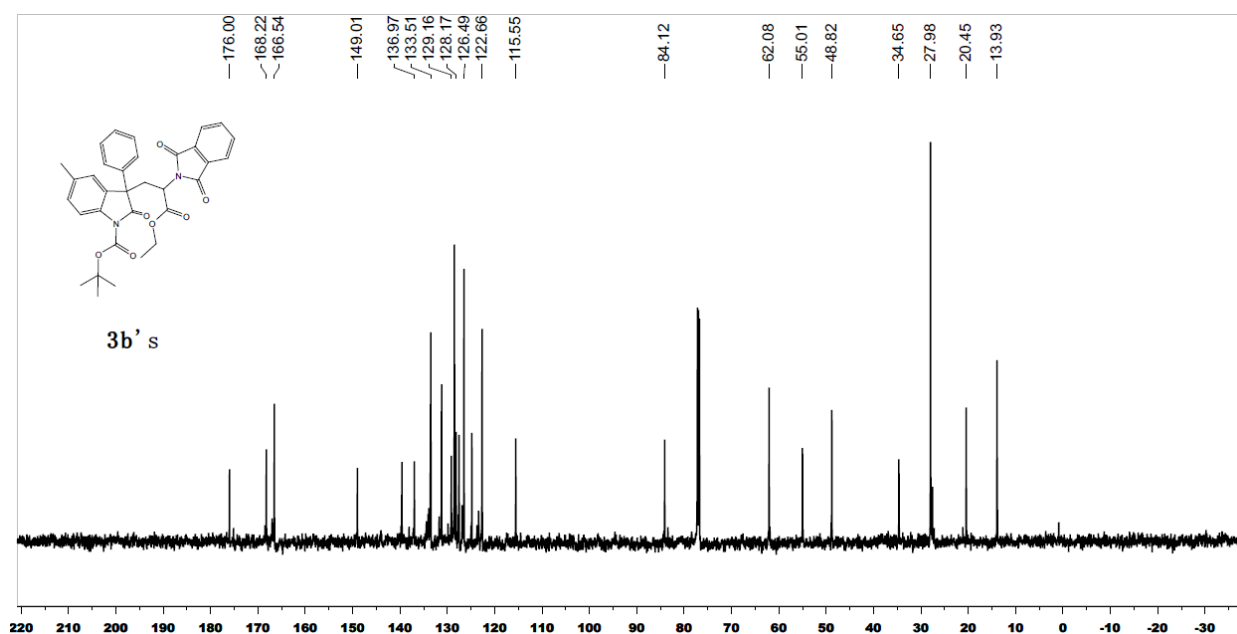

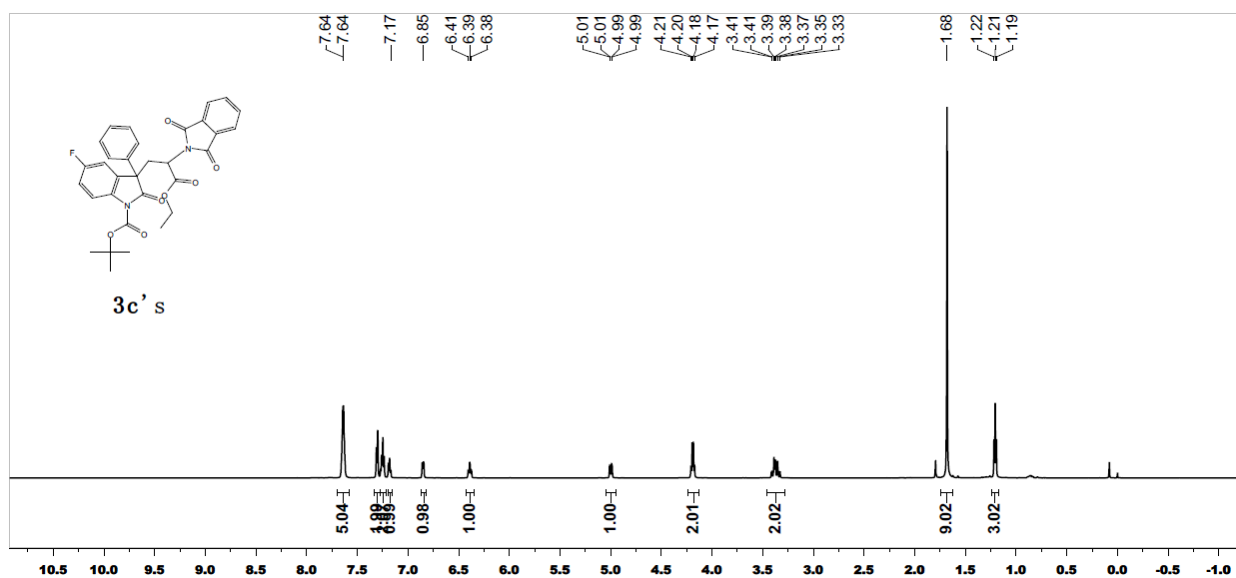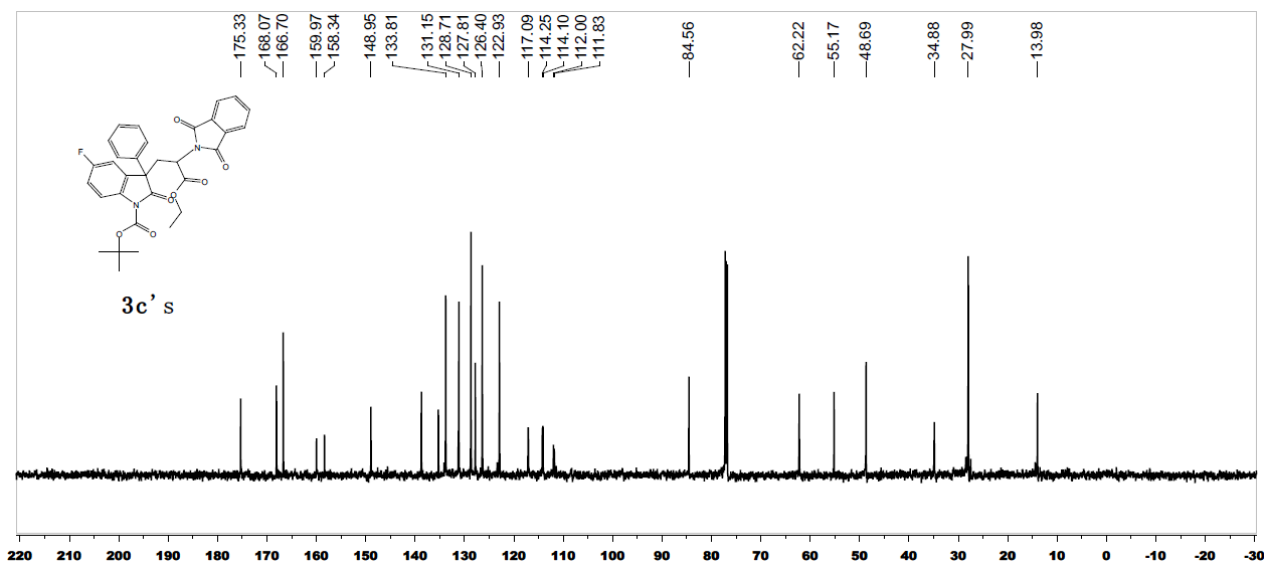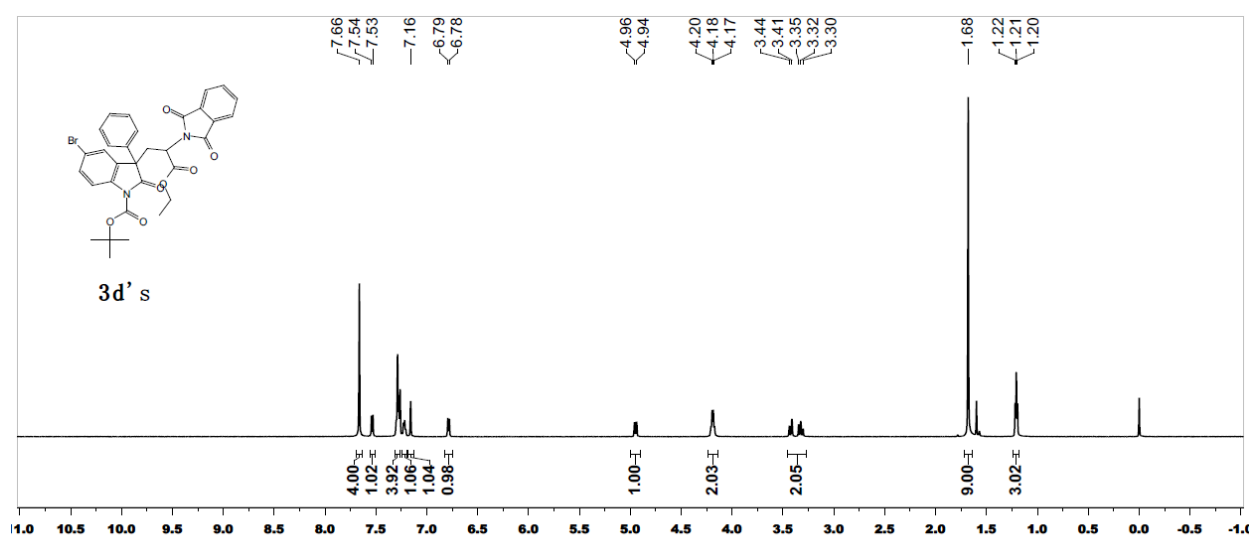

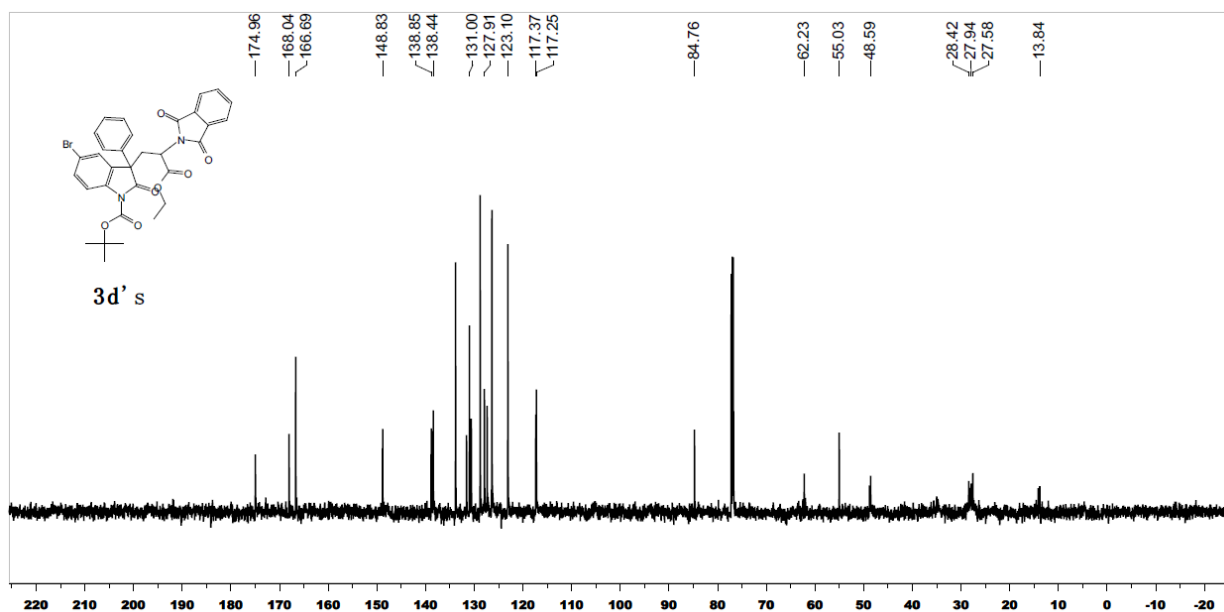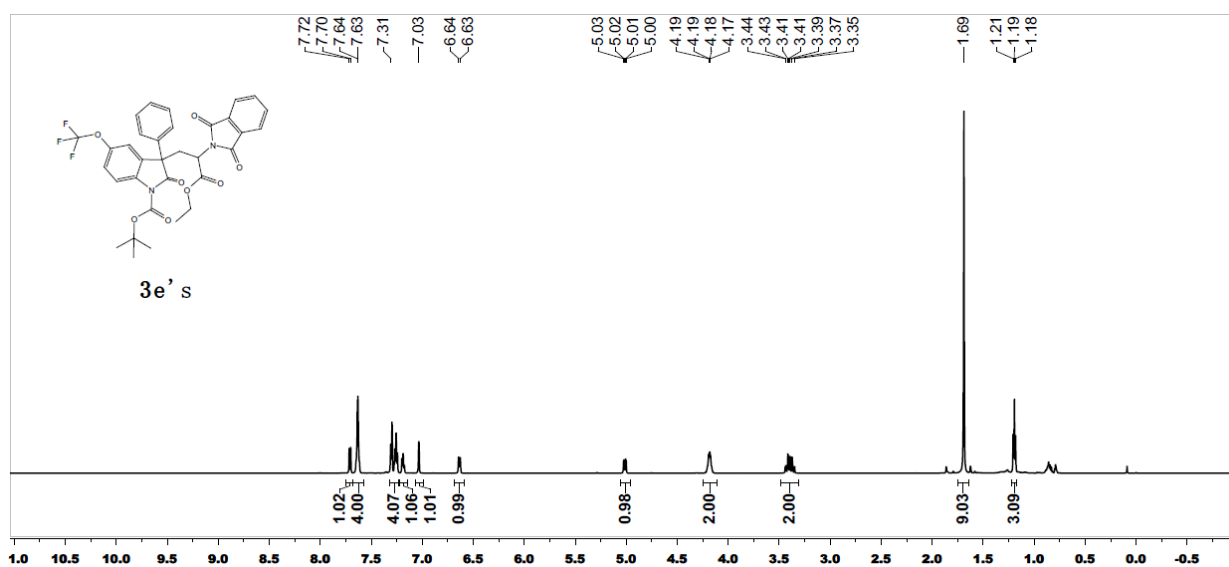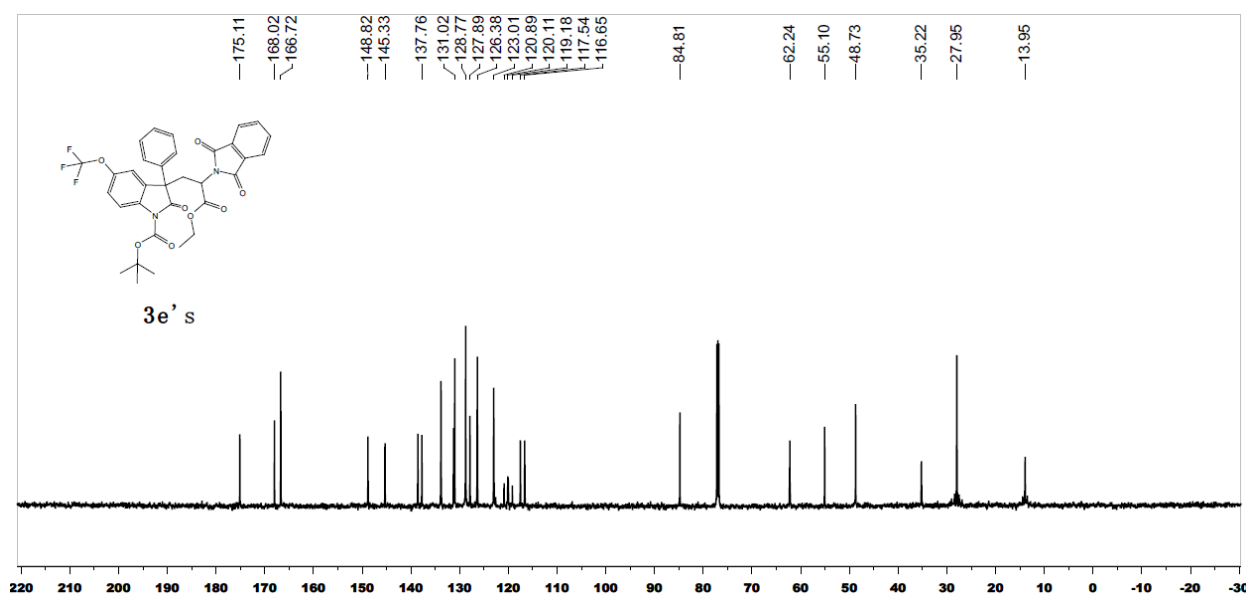

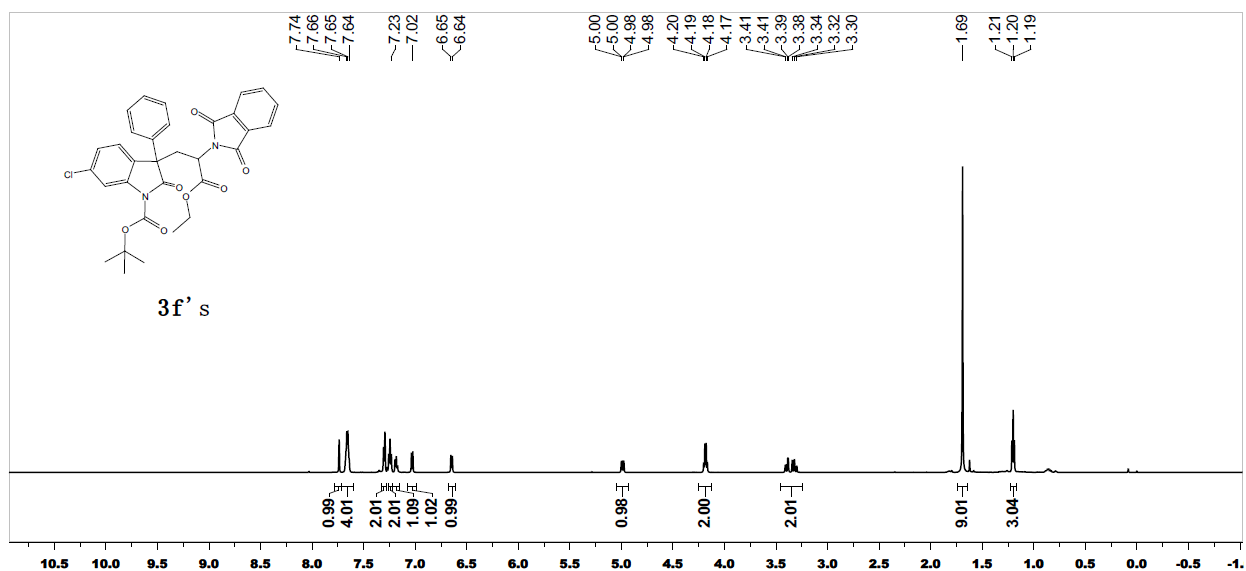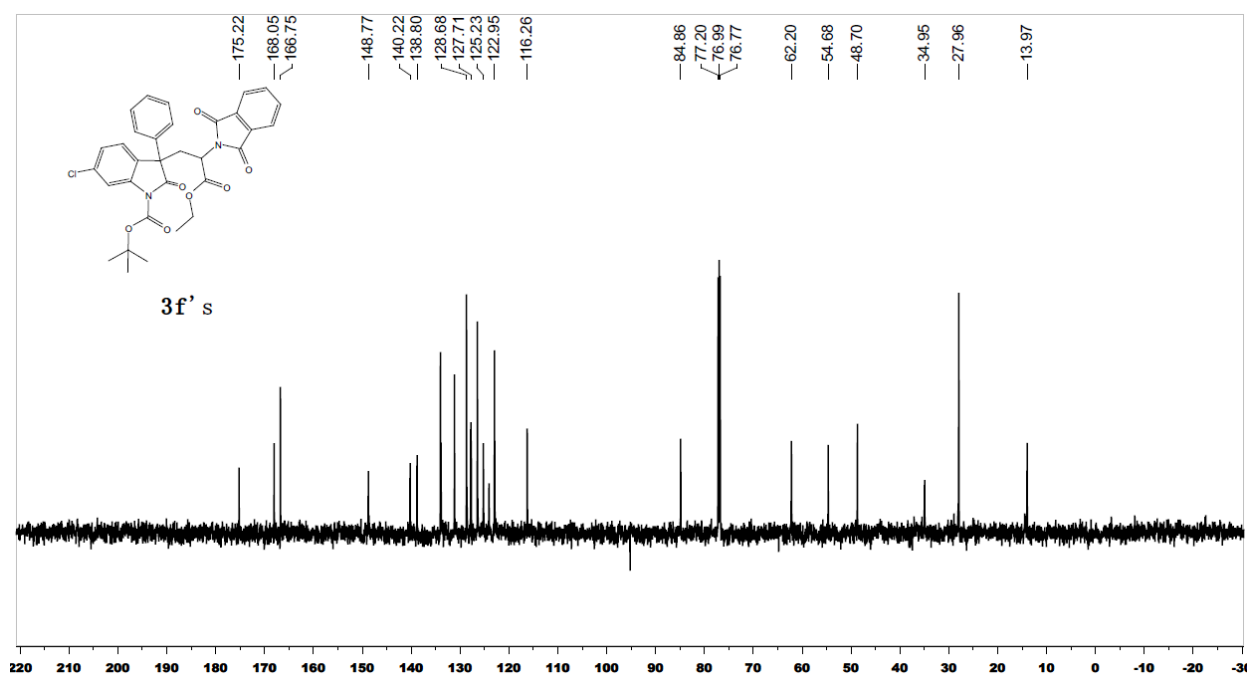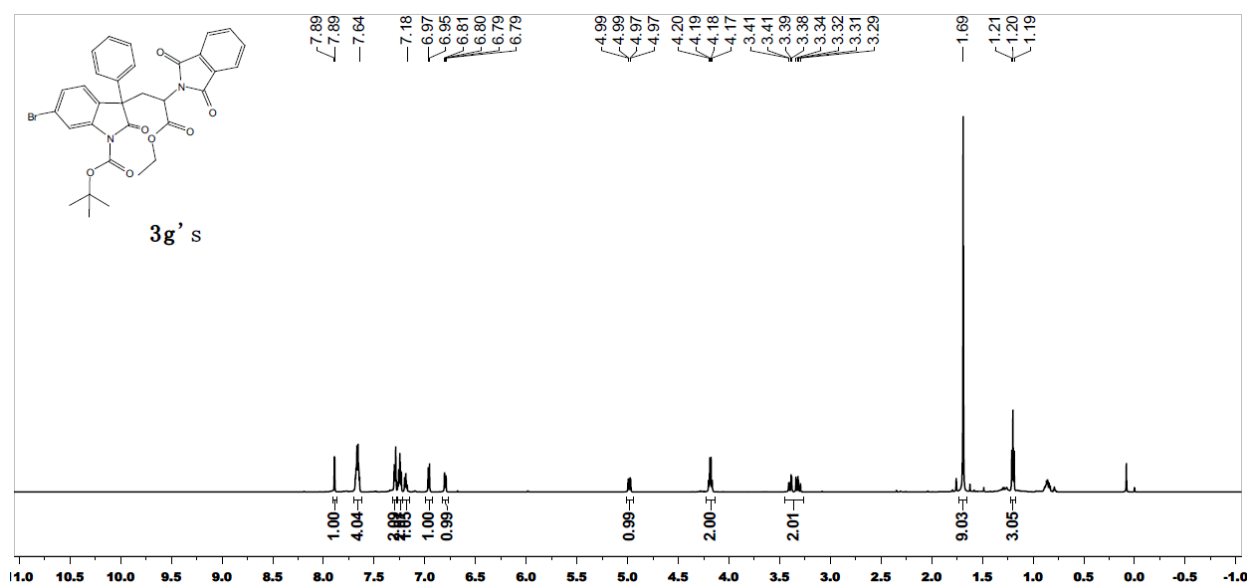

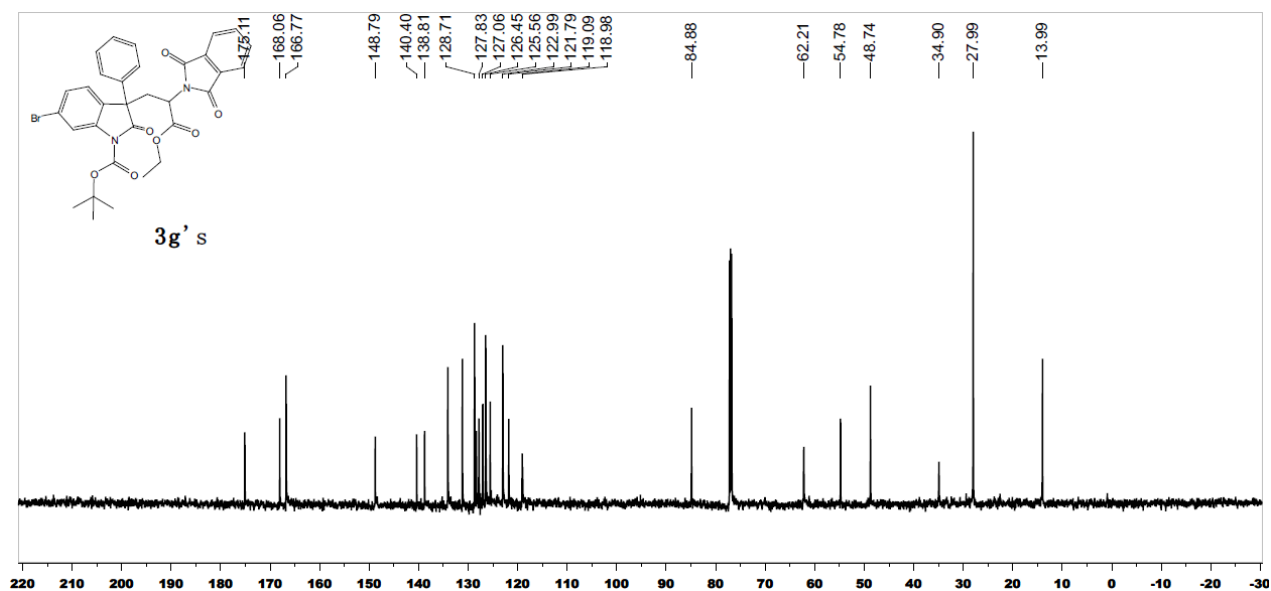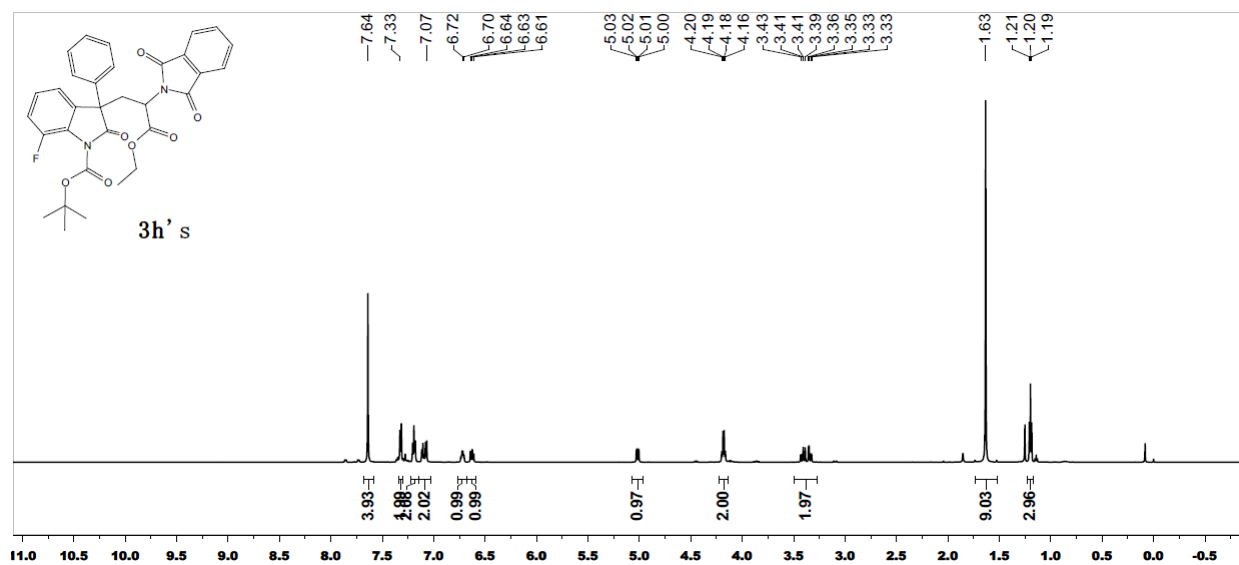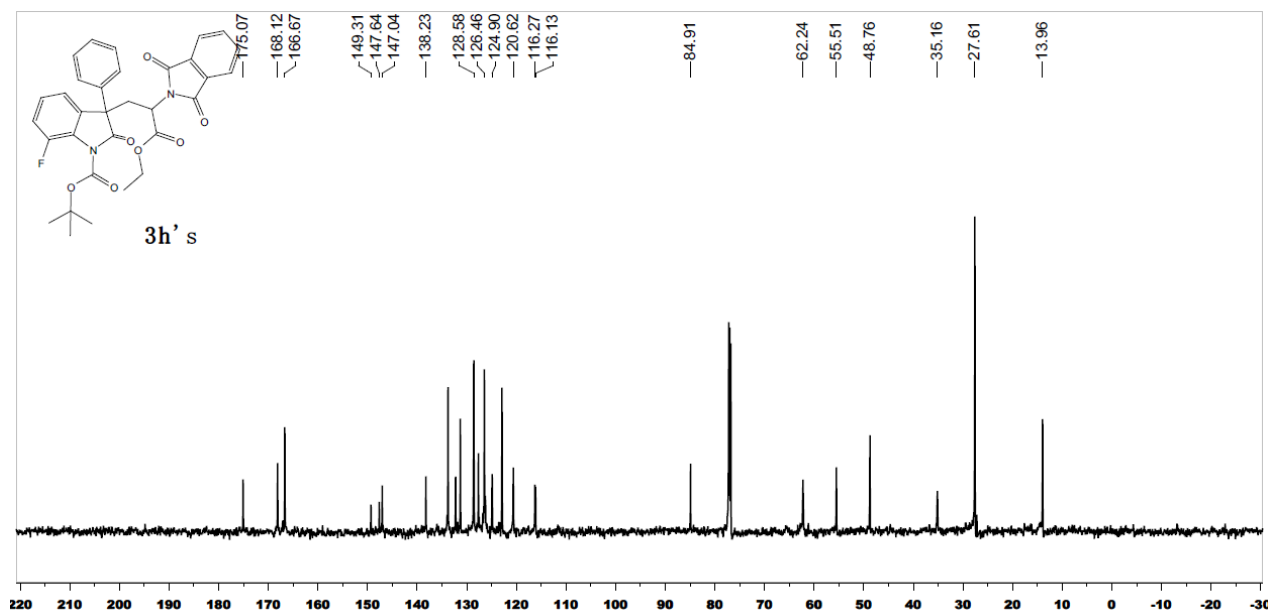

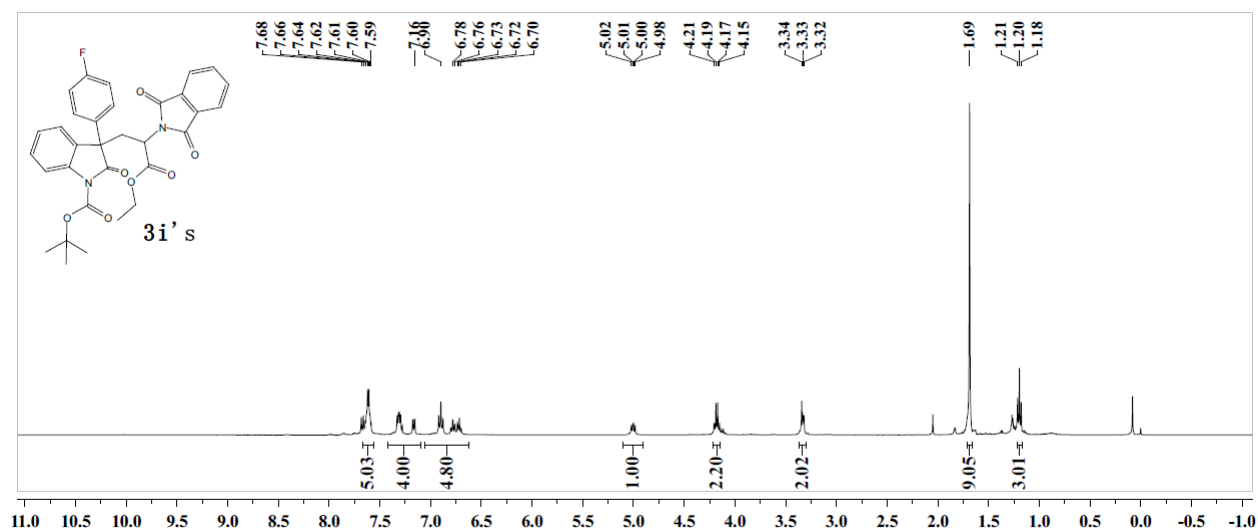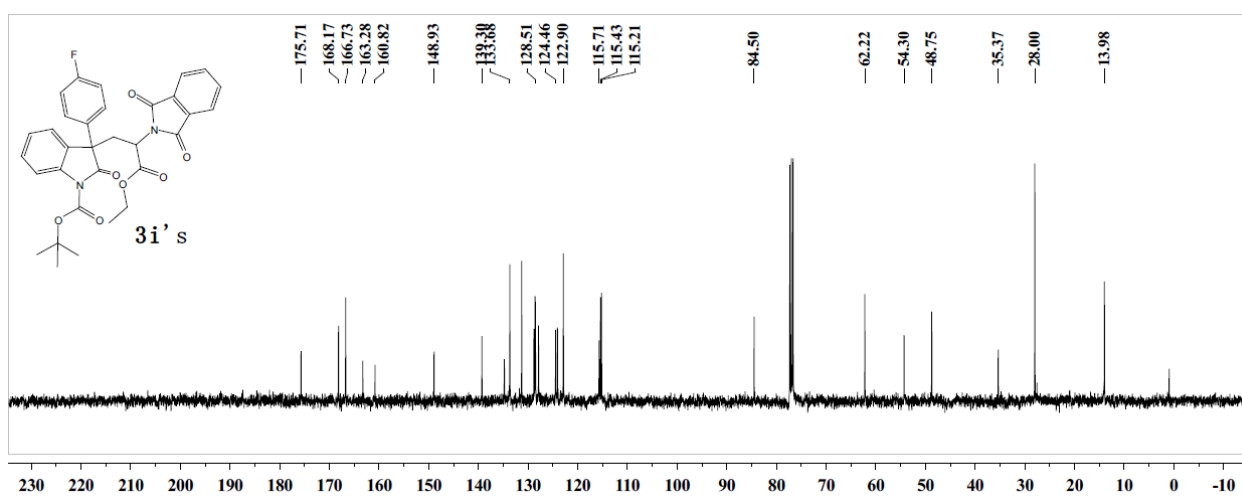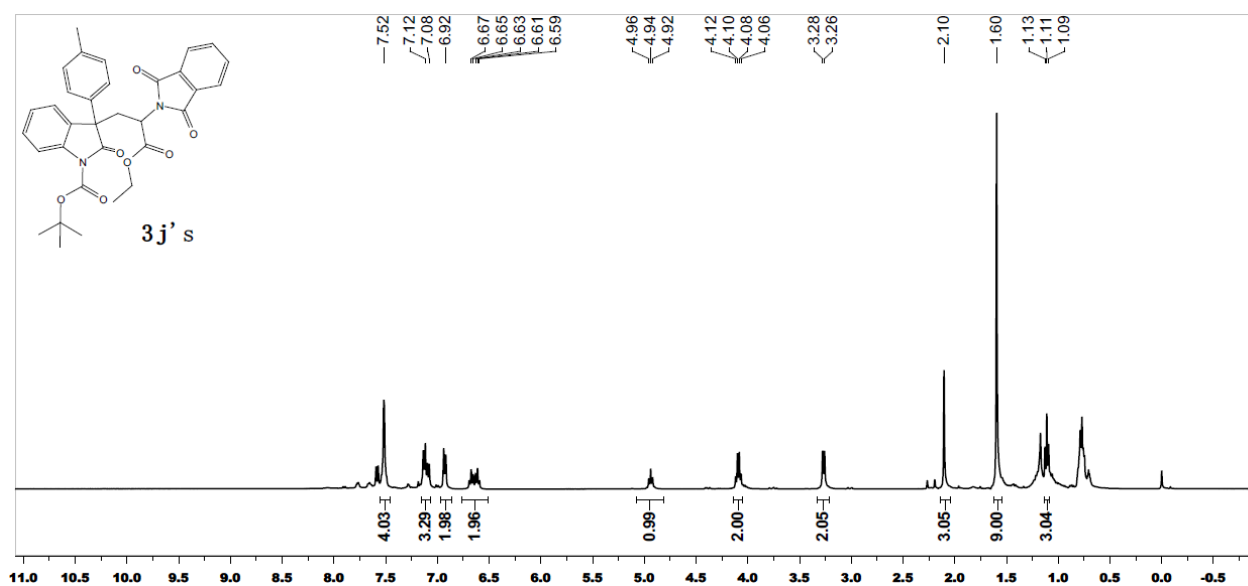

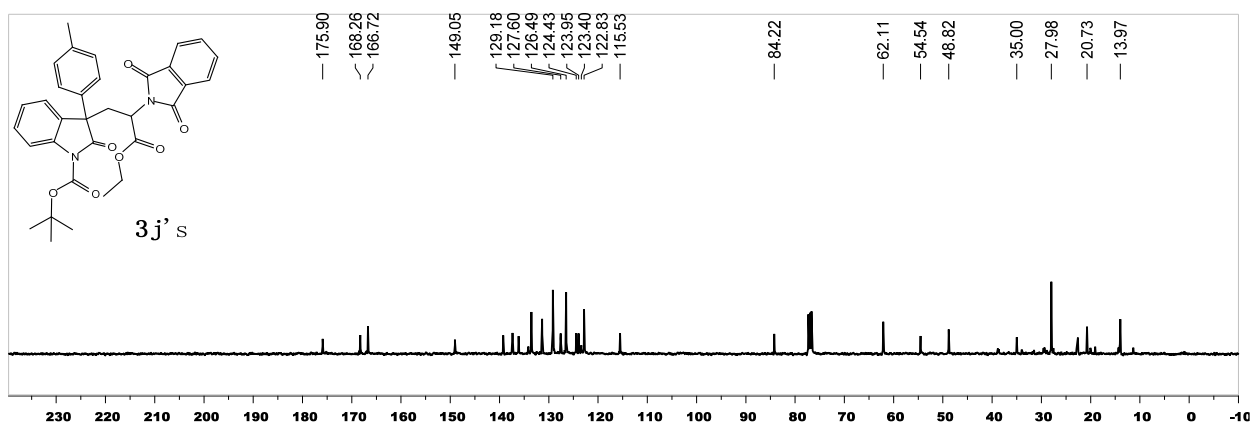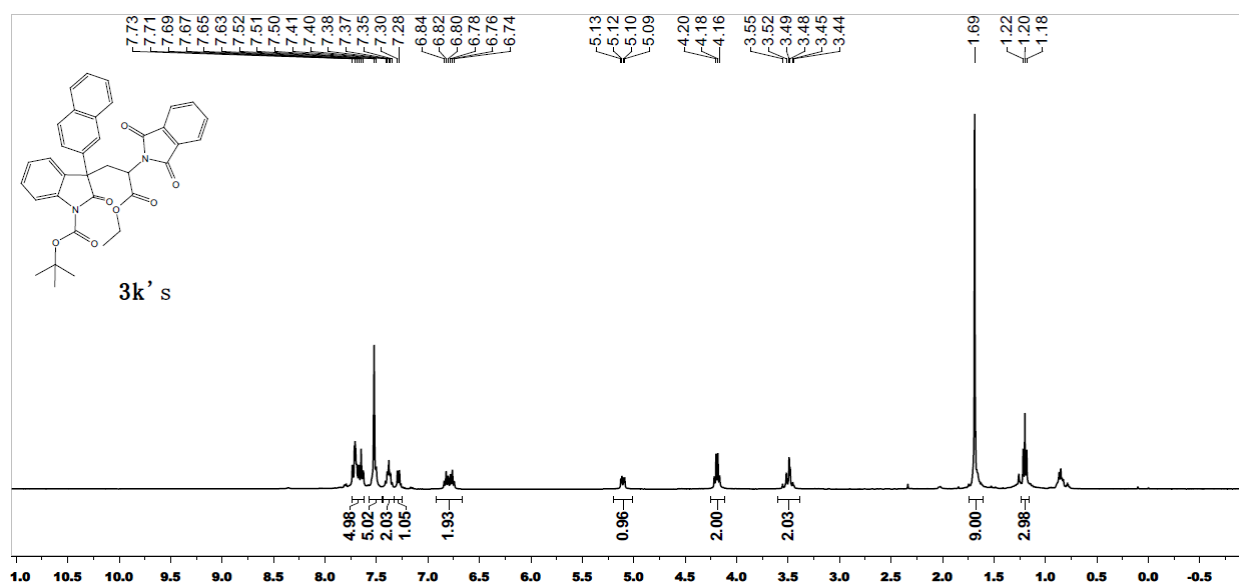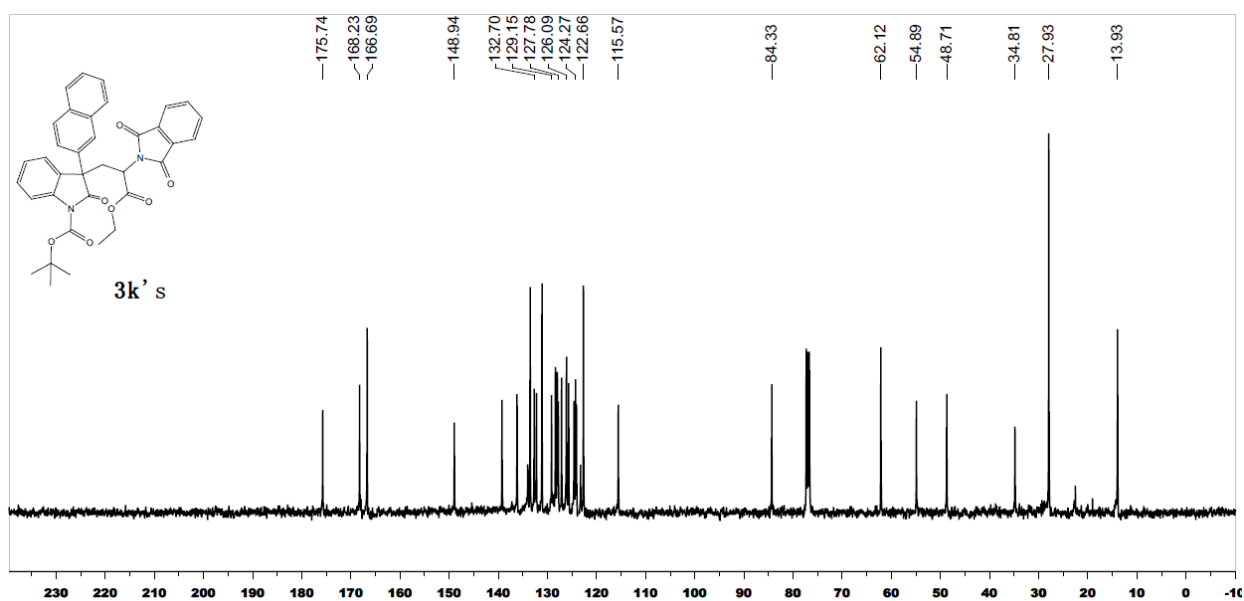

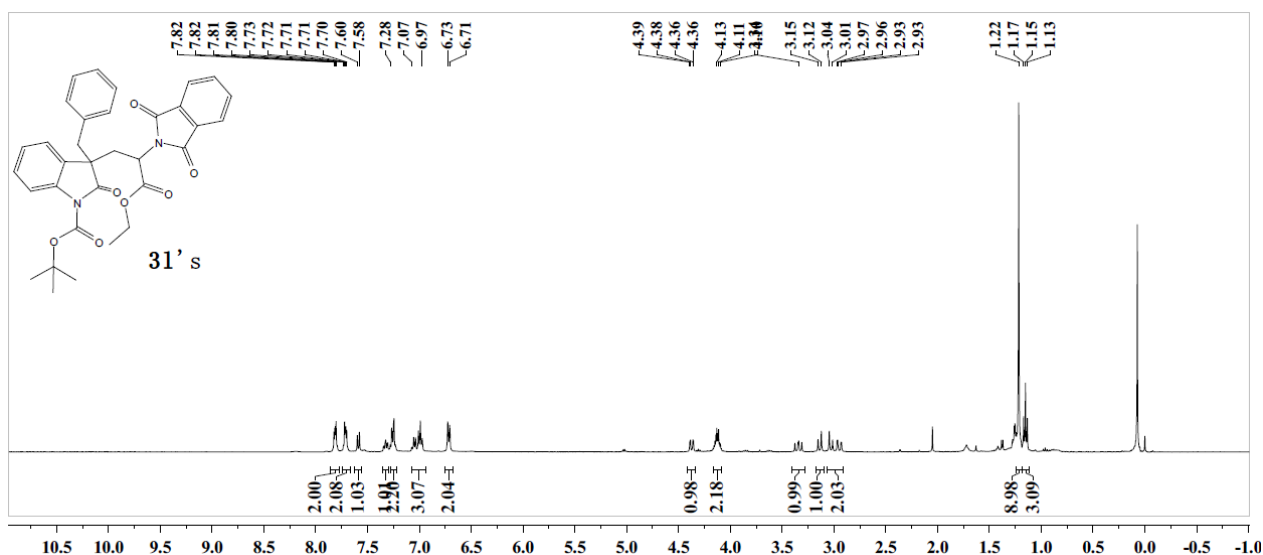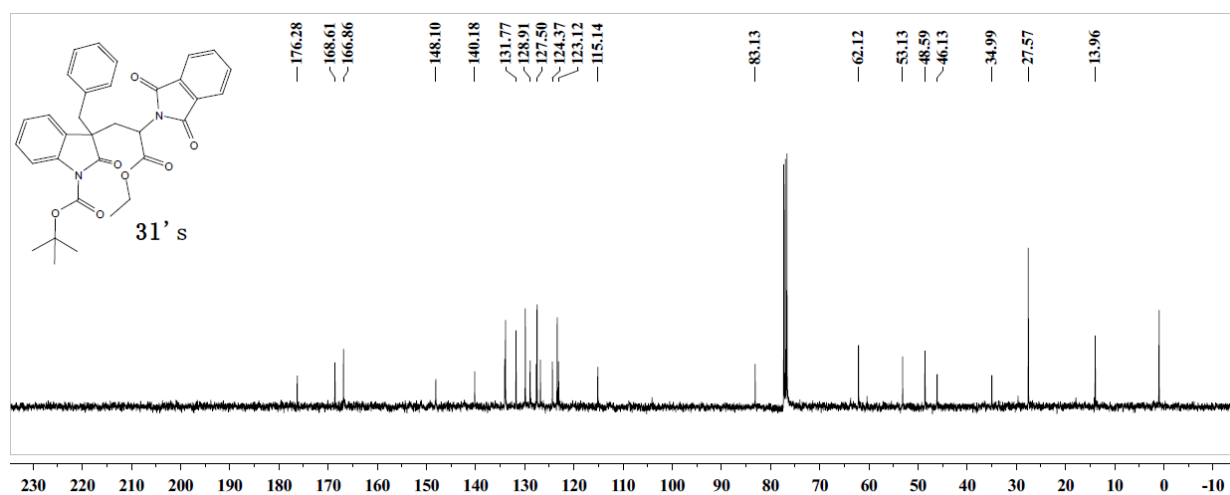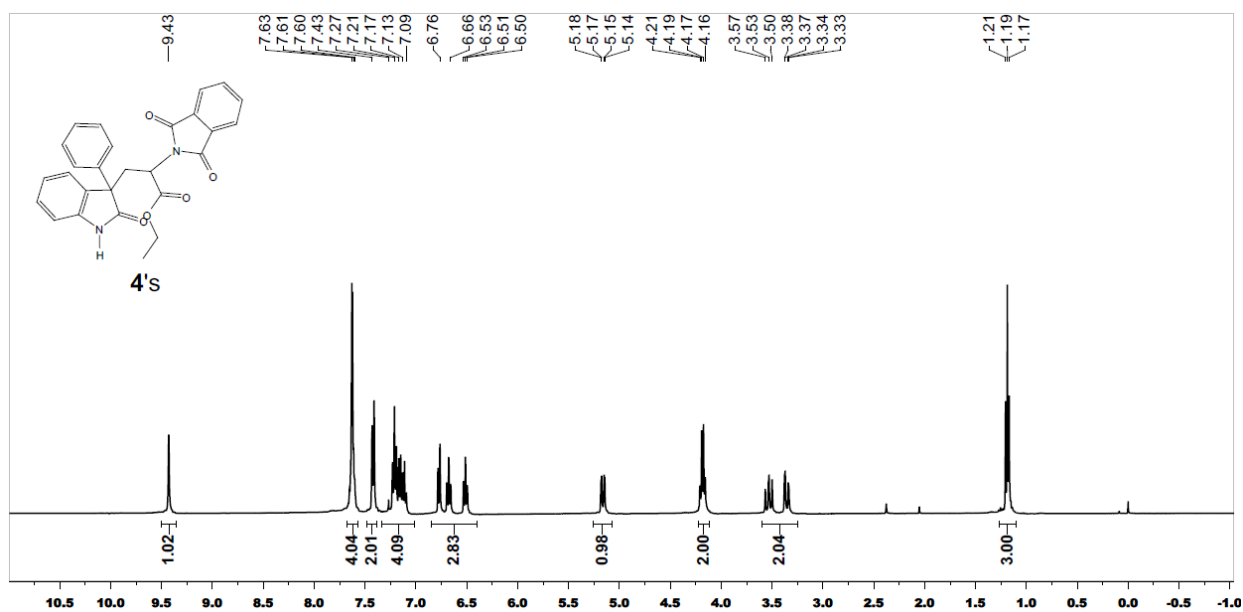

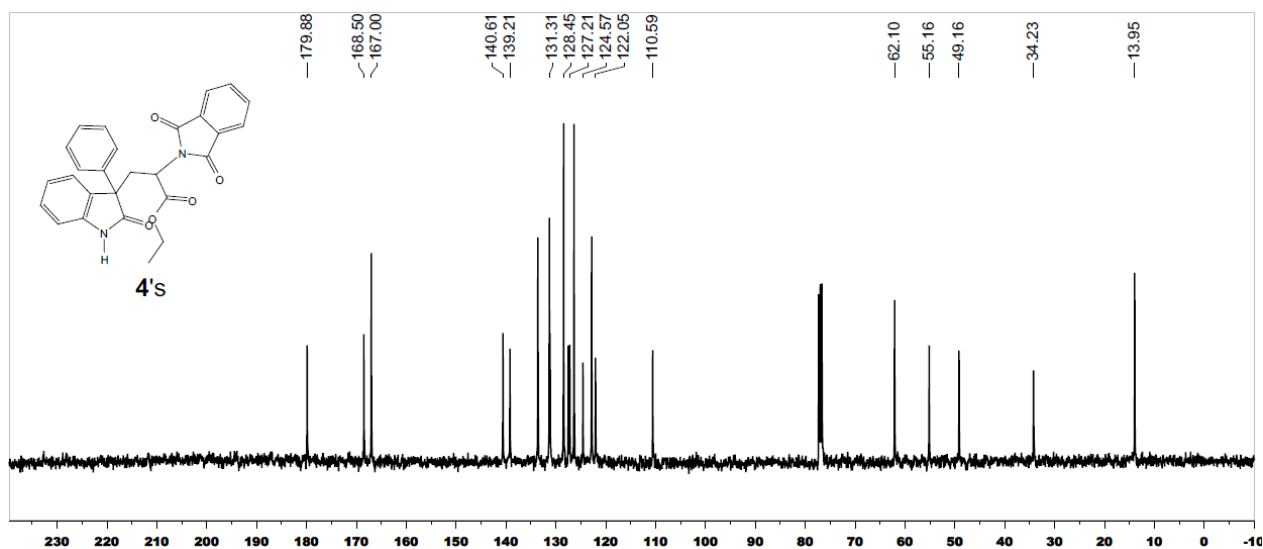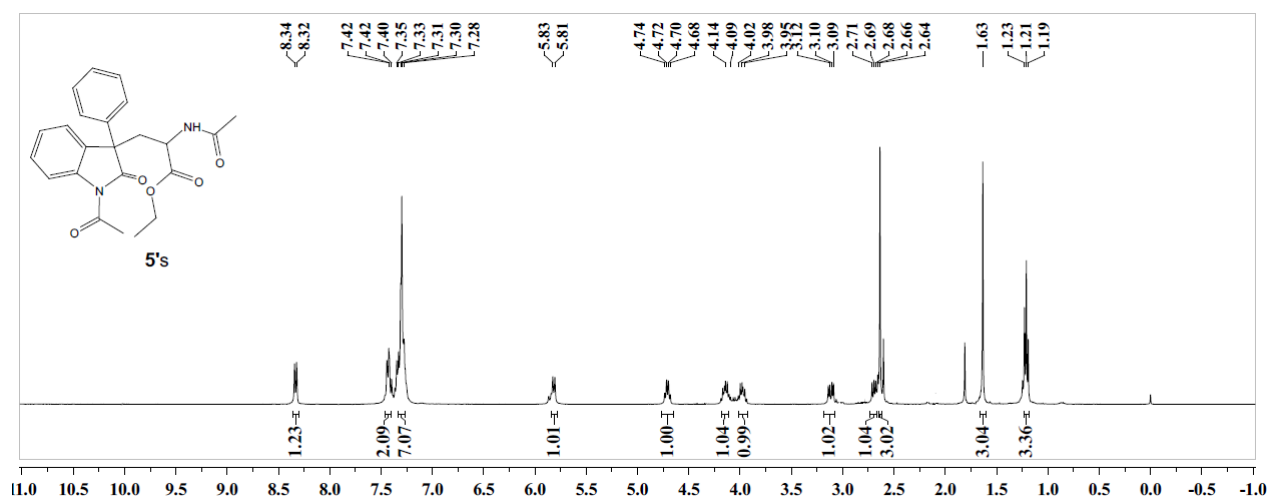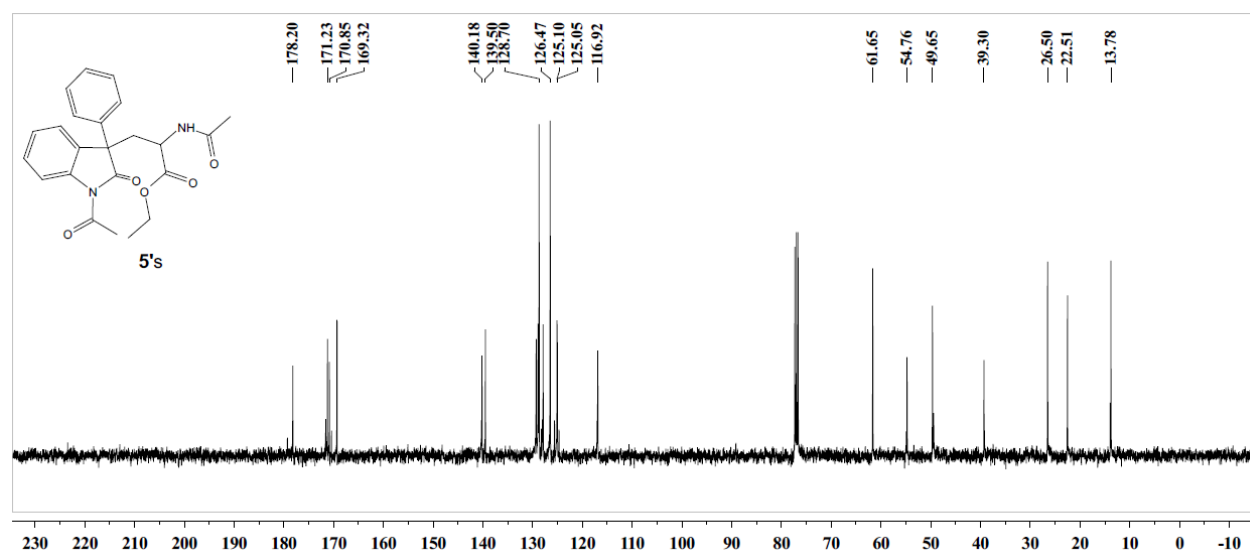

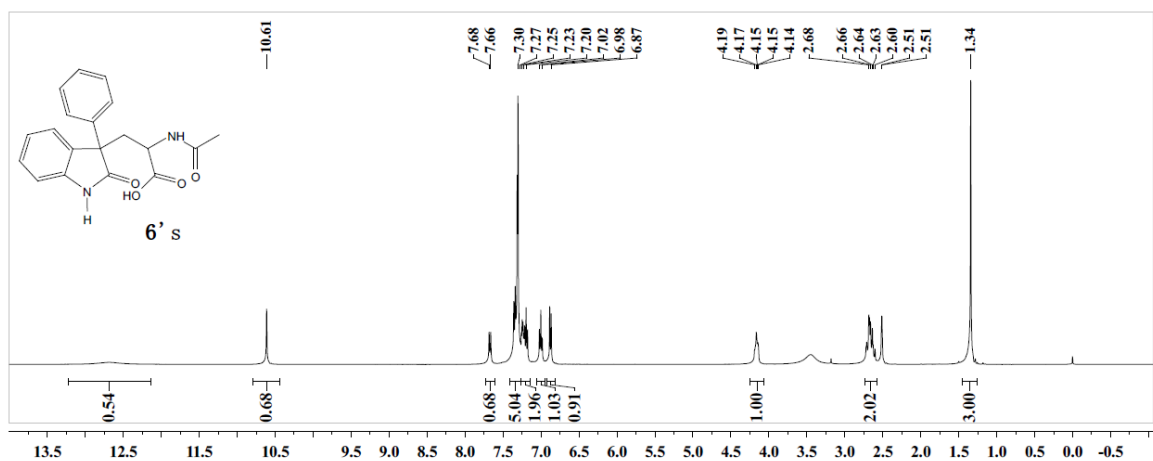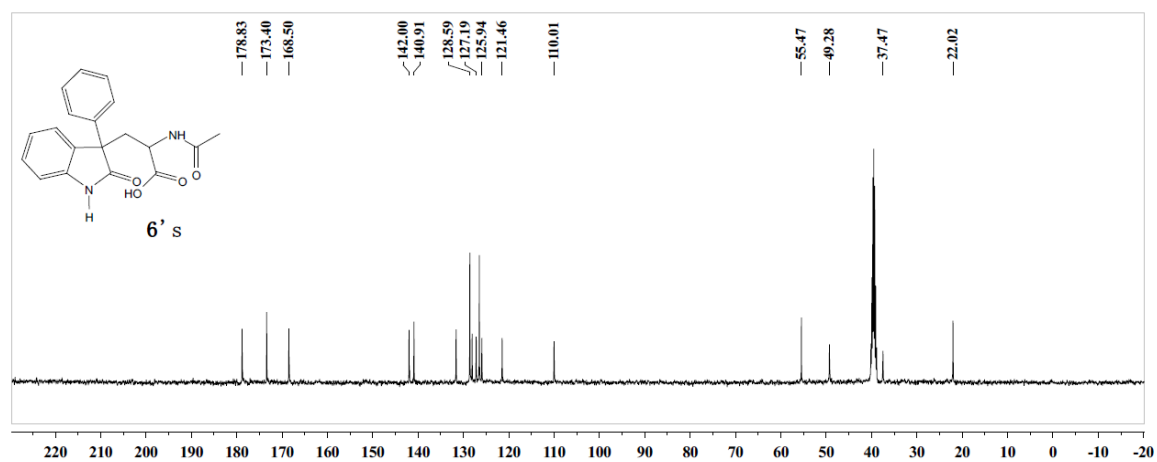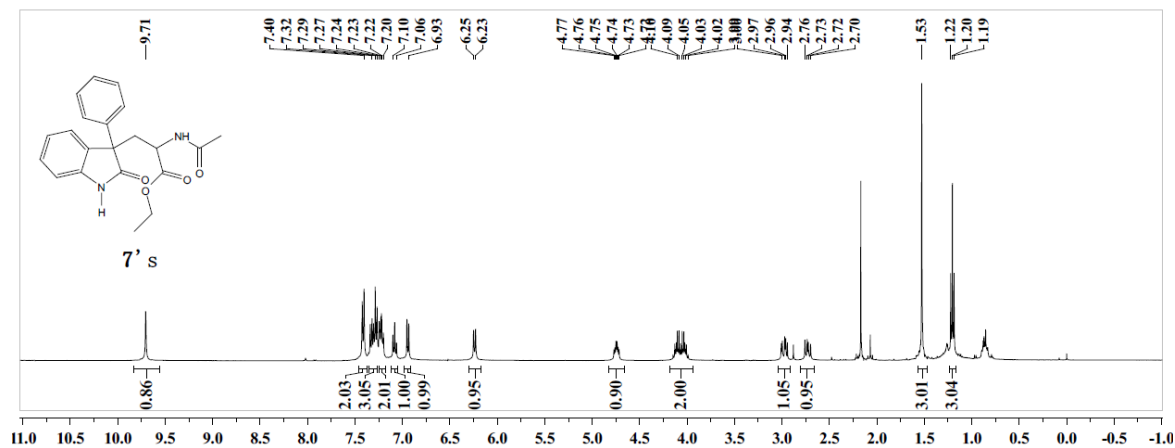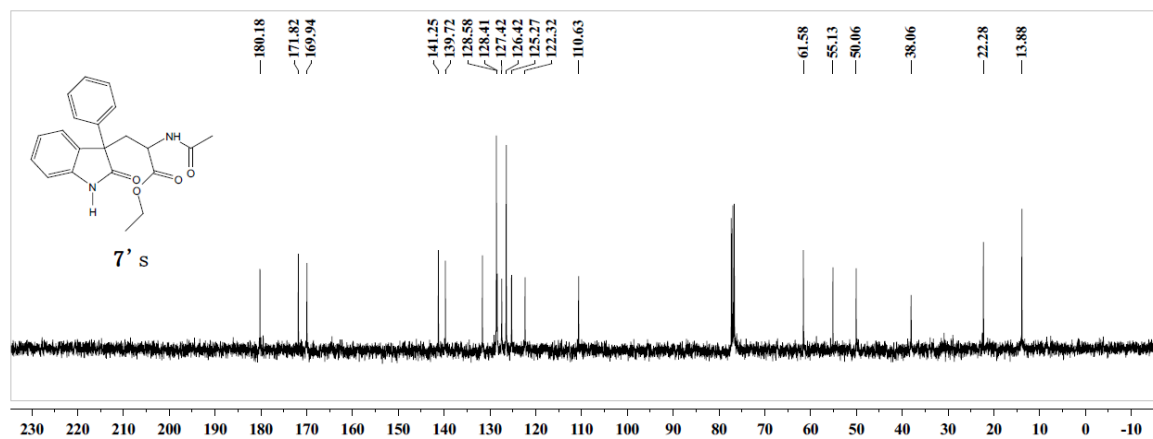

## 7.The copy of HPLC chromatograms

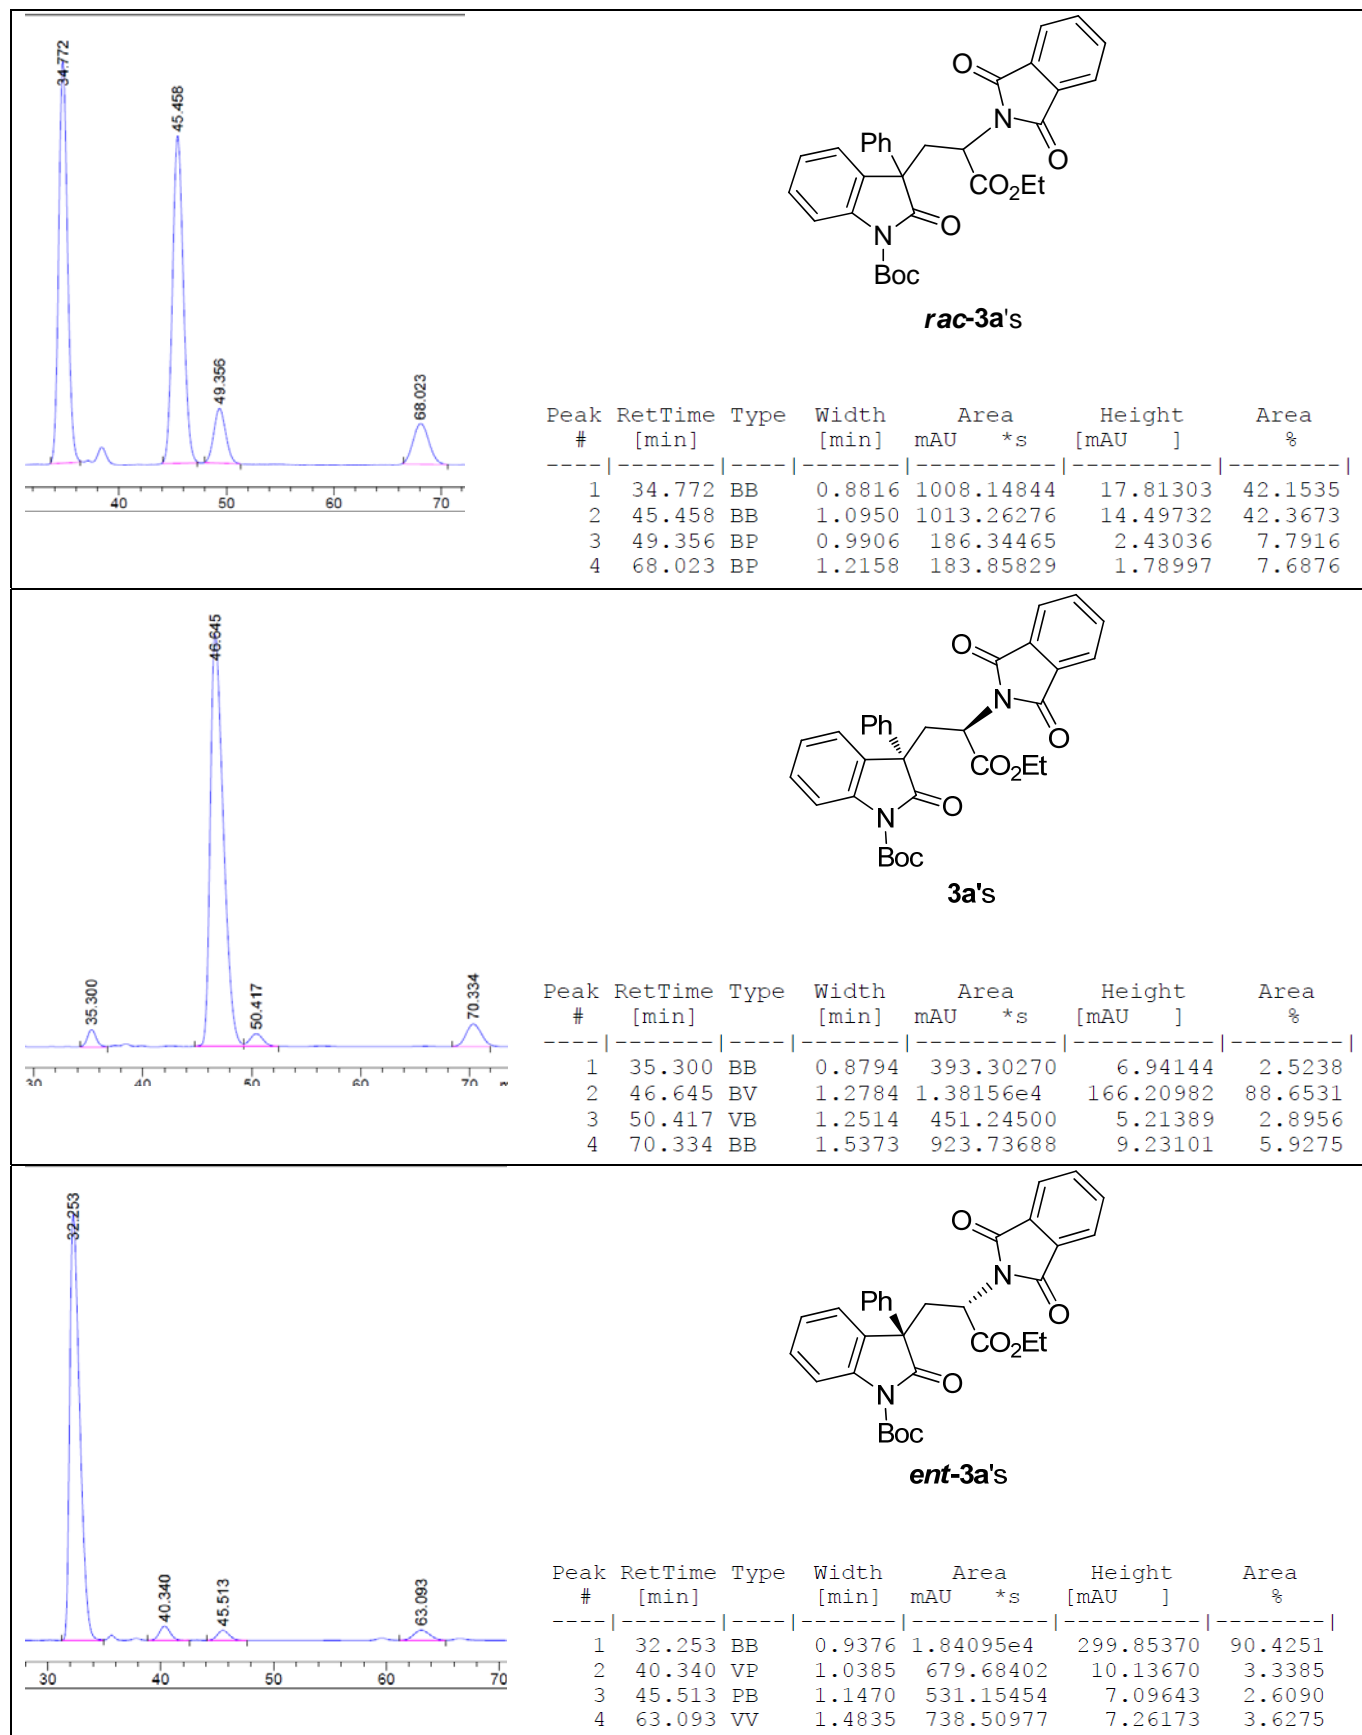

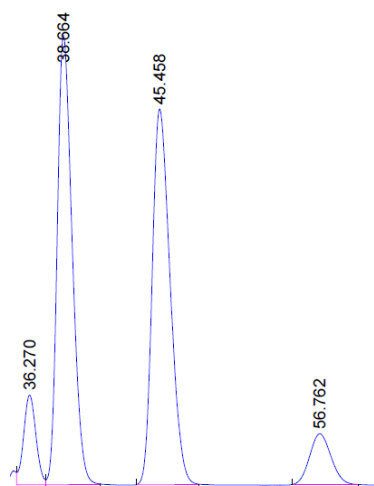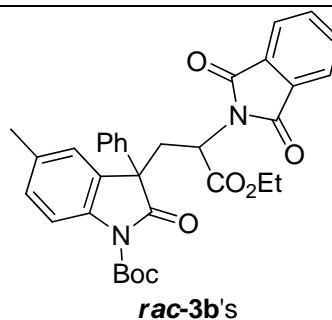

| Peak # | RetTime [min] | Type | Width [min] | Area mAU   | Area *s | Height [mAU] | Area %  |
|--------|---------------|------|-------------|------------|---------|--------------|---------|
| 1      | 36.270        | VV   | 0.9492      | 1194.19287 |         | 19.69297     | 7.1180  |
| 2      | 38.664        | VB   | 1.1260      | 7195.13281 |         | 98.49303     | 42.8869 |
| 3      | 45.458        | BB   | 1.3531      | 7205.44971 |         | 82.32357     | 42.9484 |
| 4      | 56.762        | BB   | 1.5668      | 1182.23242 |         | 11.19634     | 7.0467  |

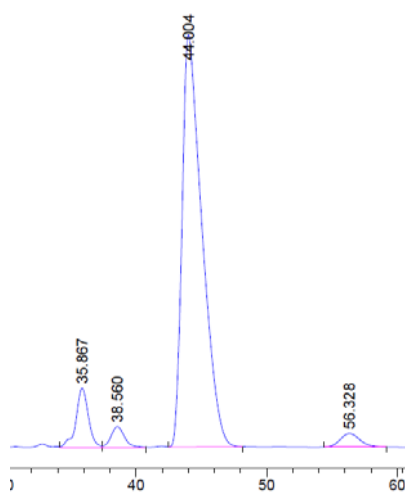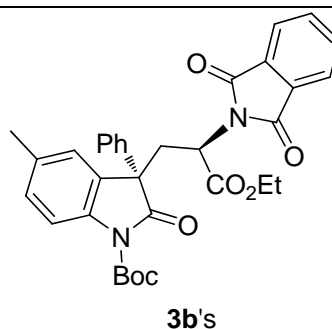

| Peak # | RetTime [min] | Type | Width [min] | Area mAU   | Area *s | Height [mAU] | Area %  |
|--------|---------------|------|-------------|------------|---------|--------------|---------|
| 1      | 35.867        | BV   | 1.0002      | 2666.17358 |         | 40.23814     | 7.7590  |
| 2      | 38.560        | VB   | 1.0987      | 1008.75745 |         | 14.16581     | 2.9356  |
| 3      | 44.004        | VB   | 1.5291      | 2.96666e4  |         | 280.25595    | 86.3346 |
| 4      | 56.328        | BB   | 1.6308      | 1020.82526 |         | 9.40160      | 2.9708  |

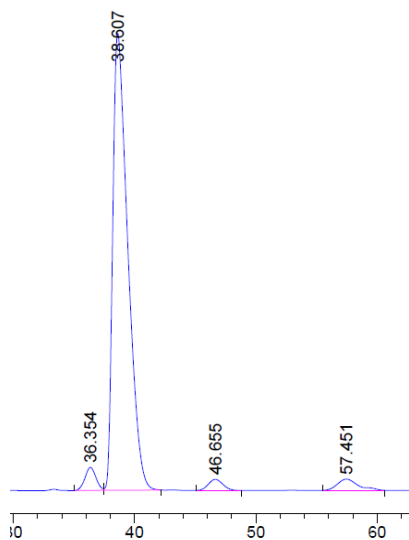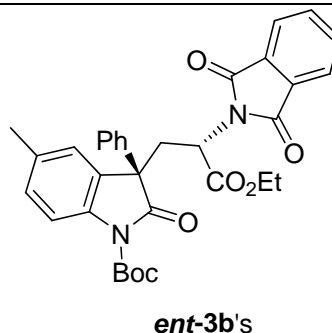

| Peak # | RetTime [min] | Type | Width [min] | Area mAU  | Area *s | Height [mAU] | Area %  |
|--------|---------------|------|-------------|-----------|---------|--------------|---------|
| 1      | 36.354        | BV   | 0.9567      | 771.52252 |         | 12.23951     | 3.3780  |
| 2      | 38.607        | VB   | 1.3391      | 2.08436e4 |         | 242.14435    | 91.2595 |
| 3      | 46.655        | BB   | 1.2567      | 493.24014 |         | 5.92462      | 2.1596  |
| 4      | 57.451        | BB   | 1.6169      | 731.56299 |         | 6.02775      | 3.2030  |

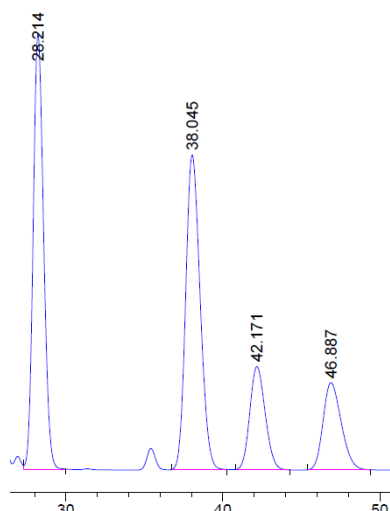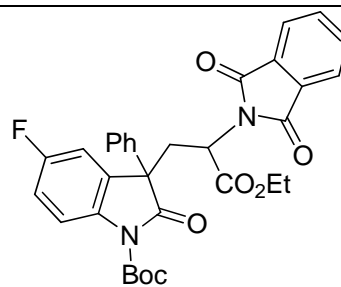

**rac-3c's**

| Peak # | RetTime [min] | Type | Width [min] | Area mAU   | Area *s | Height [mAU] | Area %  |
|--------|---------------|------|-------------|------------|---------|--------------|---------|
| 1      | 28.214        | VB   | 0.7195      | 7703.85010 |         | 166.76460    | 36.9437 |
| 2      | 38.045        | BB   | 0.9969      | 7722.15576 |         | 120.69139    | 37.0315 |
| 3      | 42.171        | BB   | 1.0730      | 2717.44019 |         | 39.66395     | 13.0314 |
| 4      | 46.887        | BB   | 1.2587      | 2709.51343 |         | 33.47735     | 12.9934 |

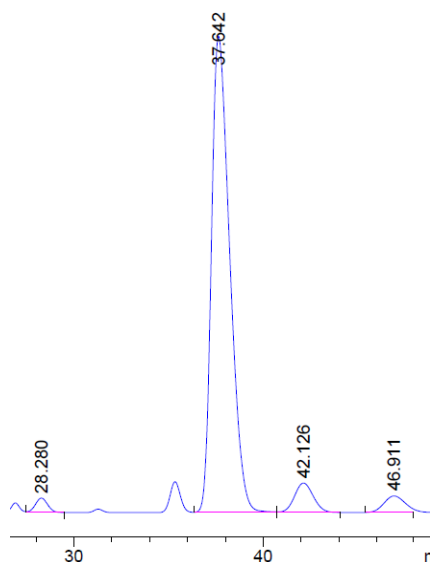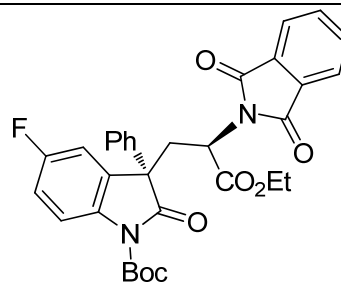

**3c's**

| Peak # | RetTime [min] | Type | Width [min] | Area mAU   | Area *s | Height [mAU] | Area %  |
|--------|---------------|------|-------------|------------|---------|--------------|---------|
| 1      | 28.280        | VB   | 0.7112      | 474.10678  |         | 10.42320     | 1.8244  |
| 2      | 37.642        | VV   | 1.0468      | 2.30738e4  |         | 343.06104    | 88.7920 |
| 3      | 42.126        | VB   | 1.0910      | 1480.43201 |         | 21.28465     | 5.6970  |
| 4      | 46.911        | BB   | 1.2500      | 958.01373  |         | 11.94700     | 3.6866  |

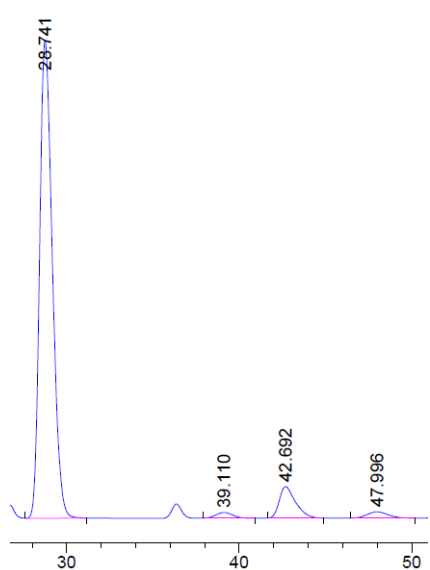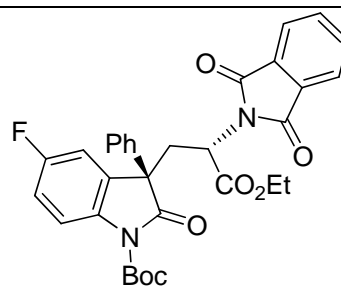

**ent-3c's**

| Peak # | RetTime [min] | Type | Width [min] | Area mAU   | Area *s | Height [mAU] | Area %  |
|--------|---------------|------|-------------|------------|---------|--------------|---------|
| 1      | 28.741        | VB   | 0.7925      | 1.79361e4  |         | 351.96783    | 89.0373 |
| 2      | 39.110        | BB   | 0.9869      | 285.31174  |         | 4.18854      | 1.4163  |
| 3      | 42.692        | BB   | 0.9731      | 1529.85779 |         | 23.29139     | 7.5944  |
| 4      | 47.996        | BP   | 1.2039      | 393.21387  |         | 4.65504      | 1.9520  |

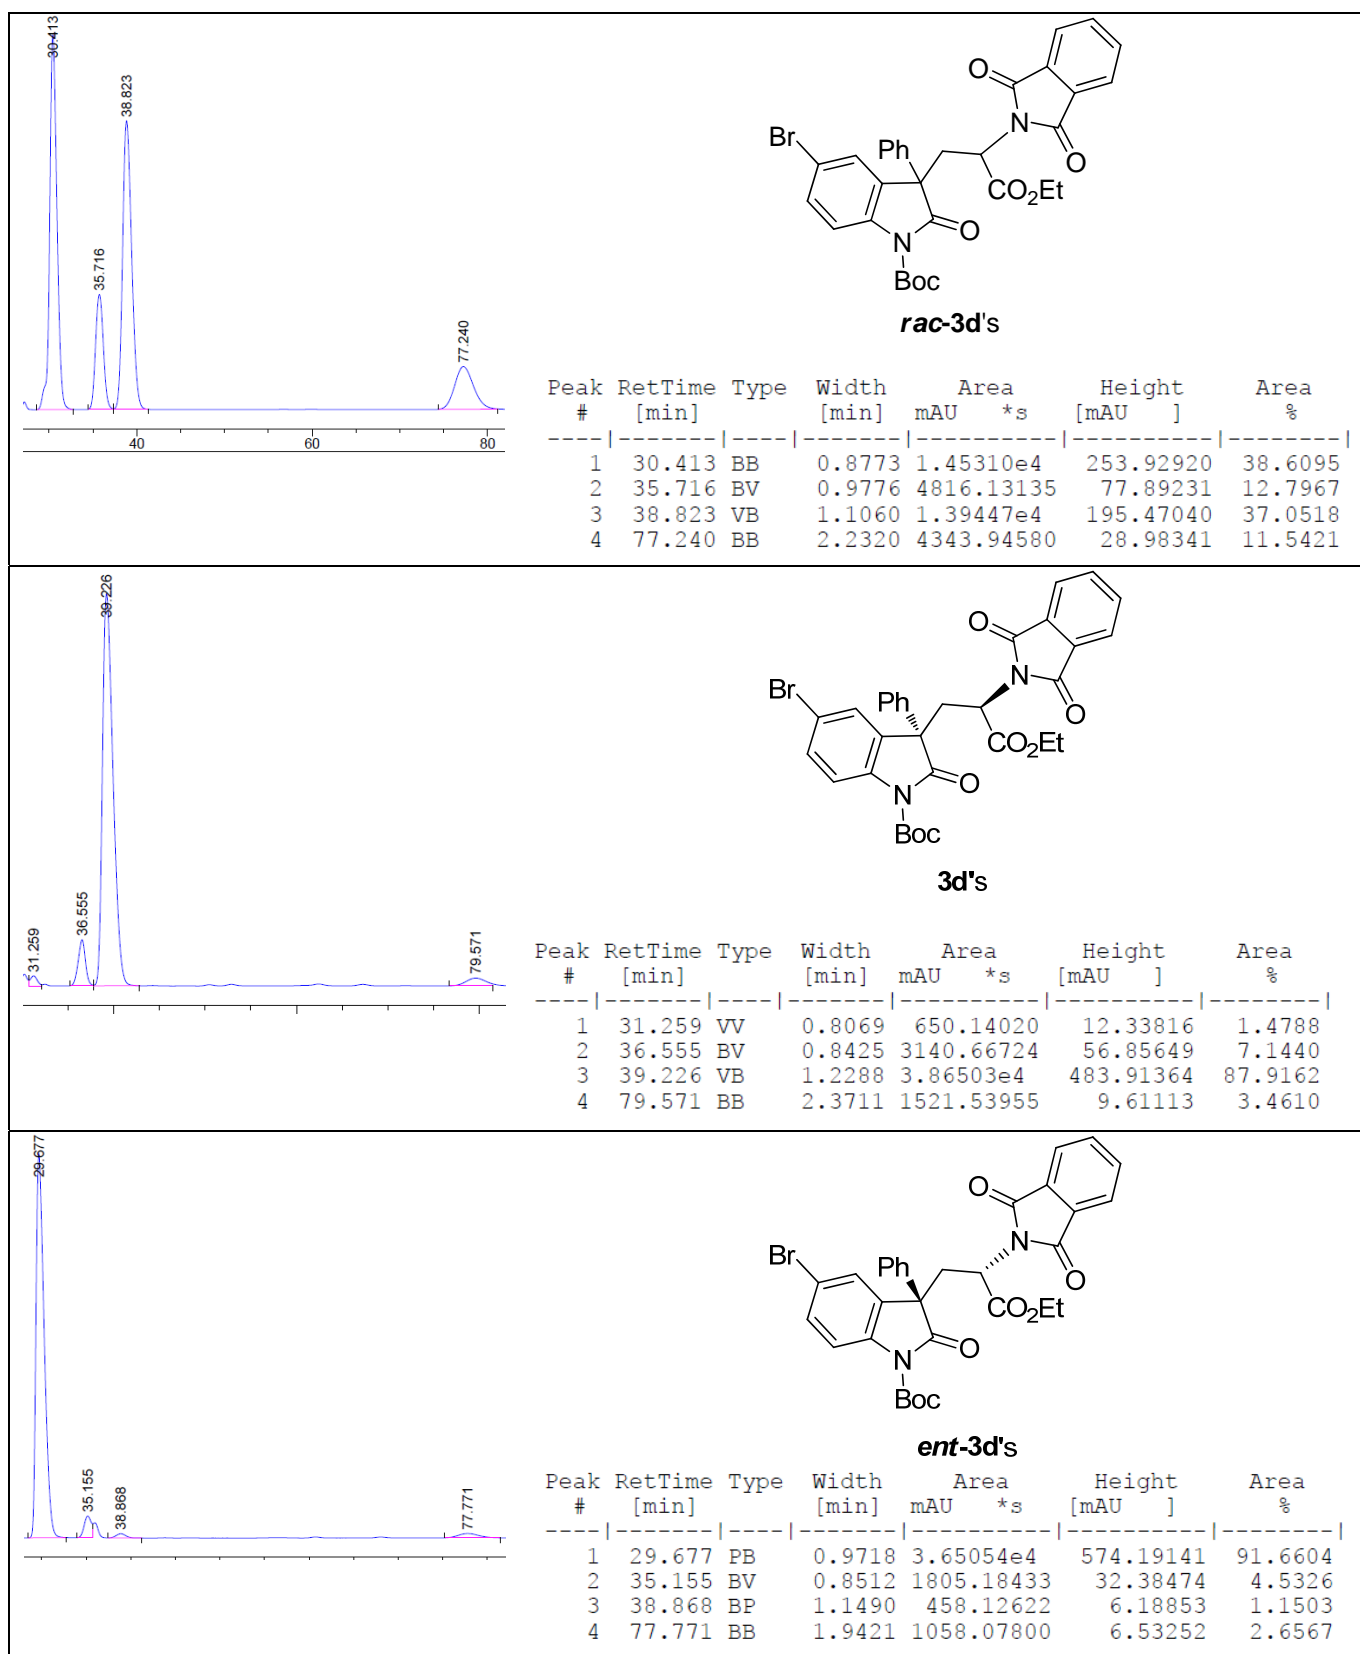

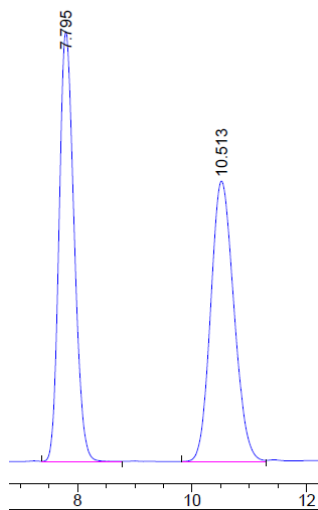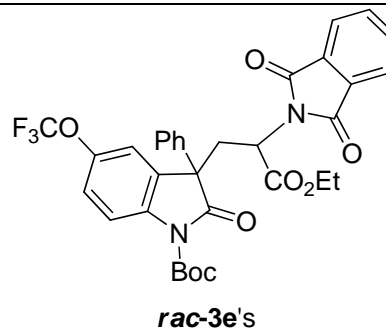

| Peak # | RetTime [min] | Type | Width [min] | Area mAU   | *s | Height [mAU] | Area %  |
|--------|---------------|------|-------------|------------|----|--------------|---------|
| 1      | 7.795         | VB   | 0.2823      | 7670.97607 |    | 421.30676    | 49.7839 |
| 2      | 10.513        | BV   | 0.4390      | 7737.58545 |    | 274.90714    | 50.2161 |

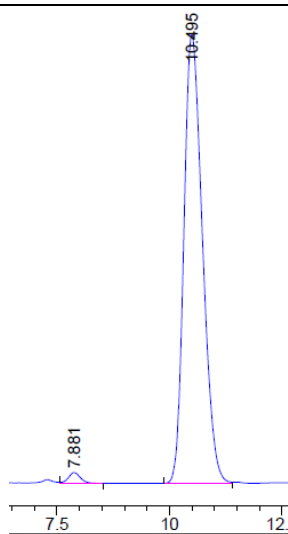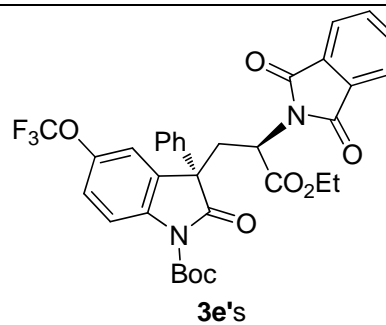

| Peak # | RetTime [min] | Type | Width [min] | Area mAU  | *s | Height [mAU] | Area %  |
|--------|---------------|------|-------------|-----------|----|--------------|---------|
| 1      | 7.881         | VB   | 0.2872      | 294.58163 |    | 15.60914     | 1.5649  |
| 2      | 10.495        | BV   | 0.4445      | 1.85293e4 |    | 647.47321    | 98.4351 |

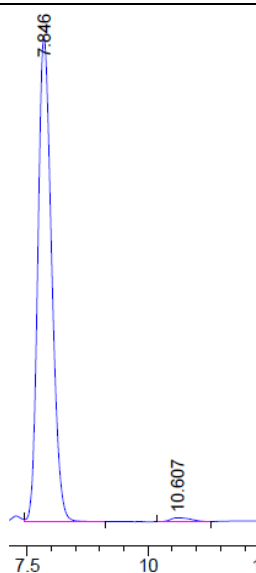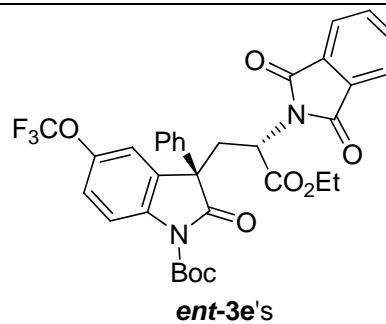

| Peak # | RetTime [min] | Type | Width [min] | Area mAU   | *s | Height [mAU] | Area %  |
|--------|---------------|------|-------------|------------|----|--------------|---------|
| 1      | 7.846         | VB   | 0.3065      | 9403.25879 |    | 475.43497    | 98.7560 |
| 2      | 10.607        | BV   | 0.4867      | 118.45387  |    | 3.91814      | 1.2440  |

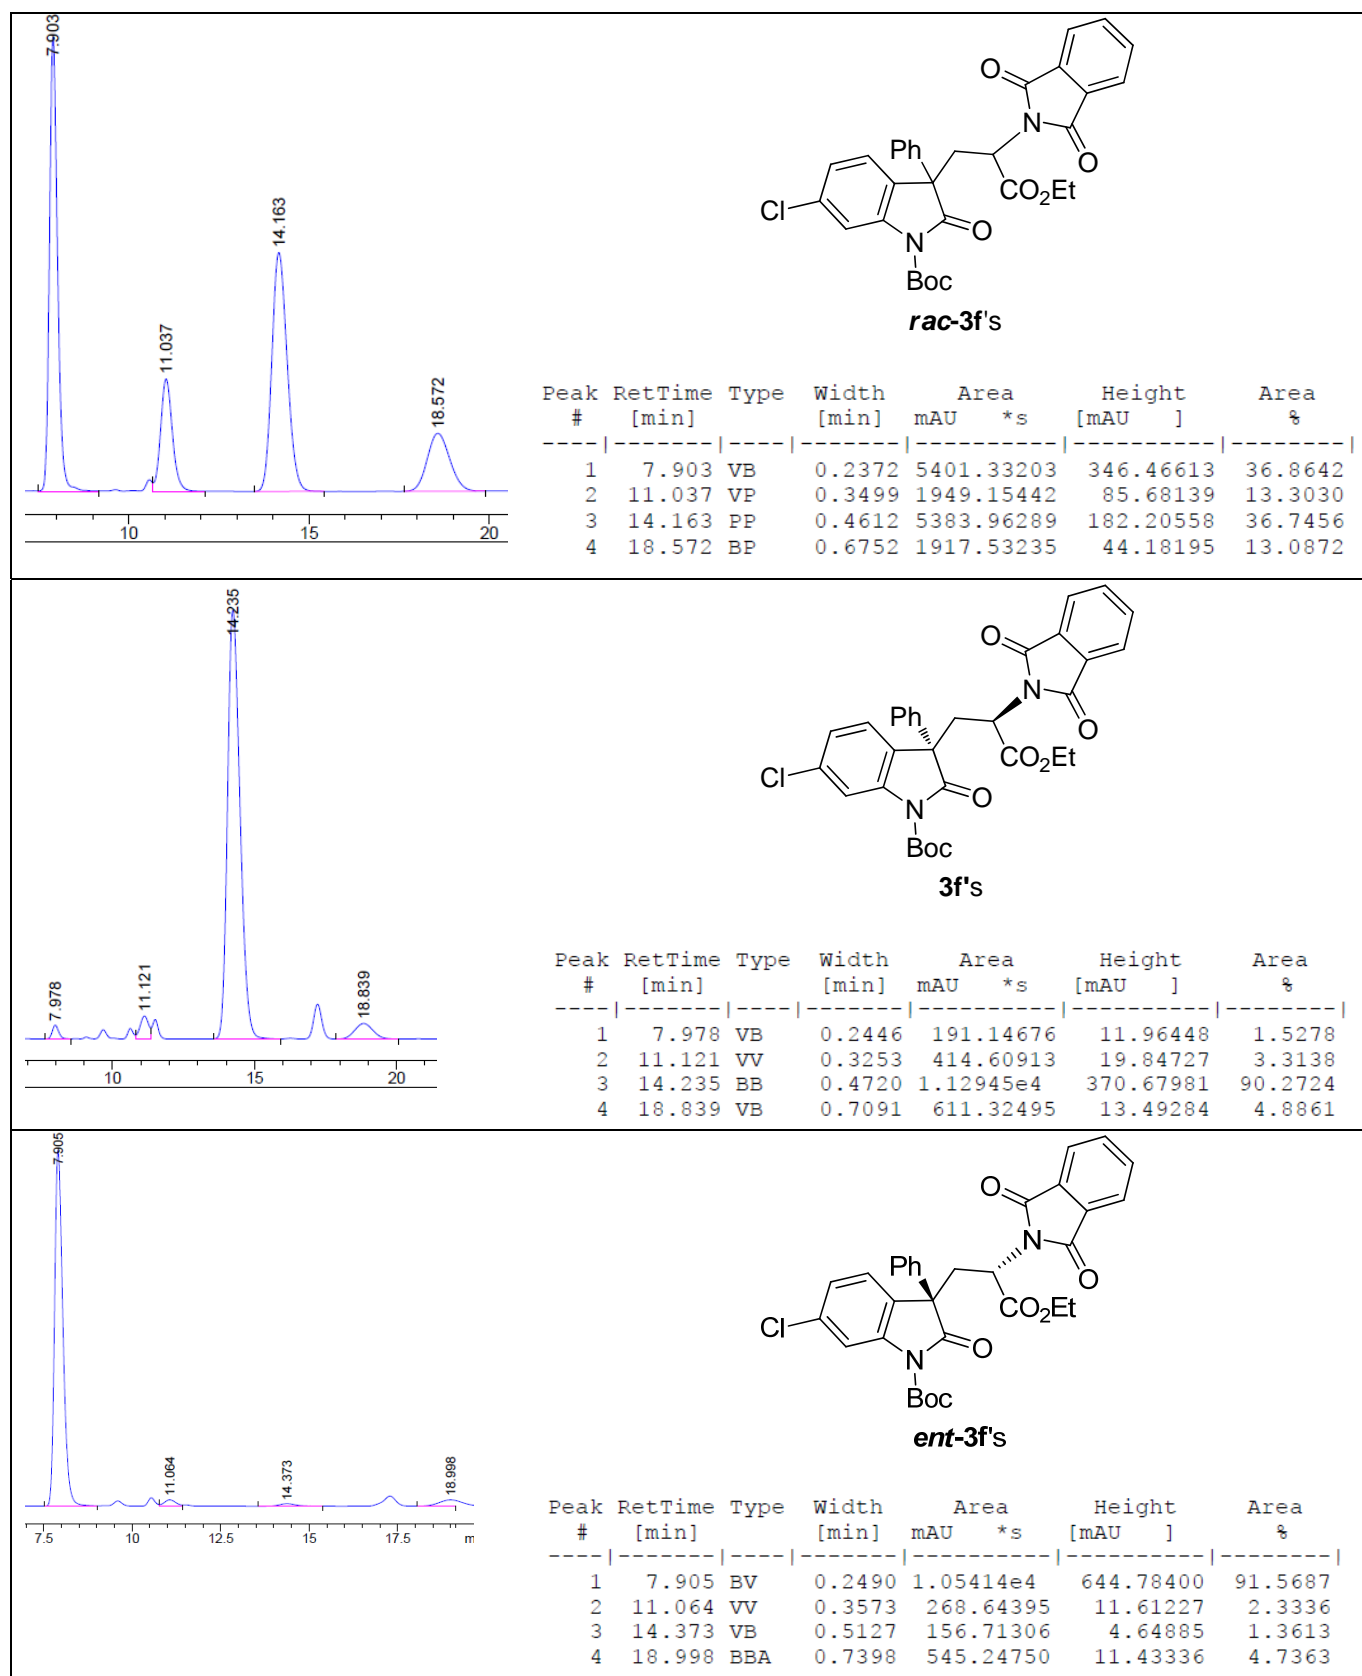

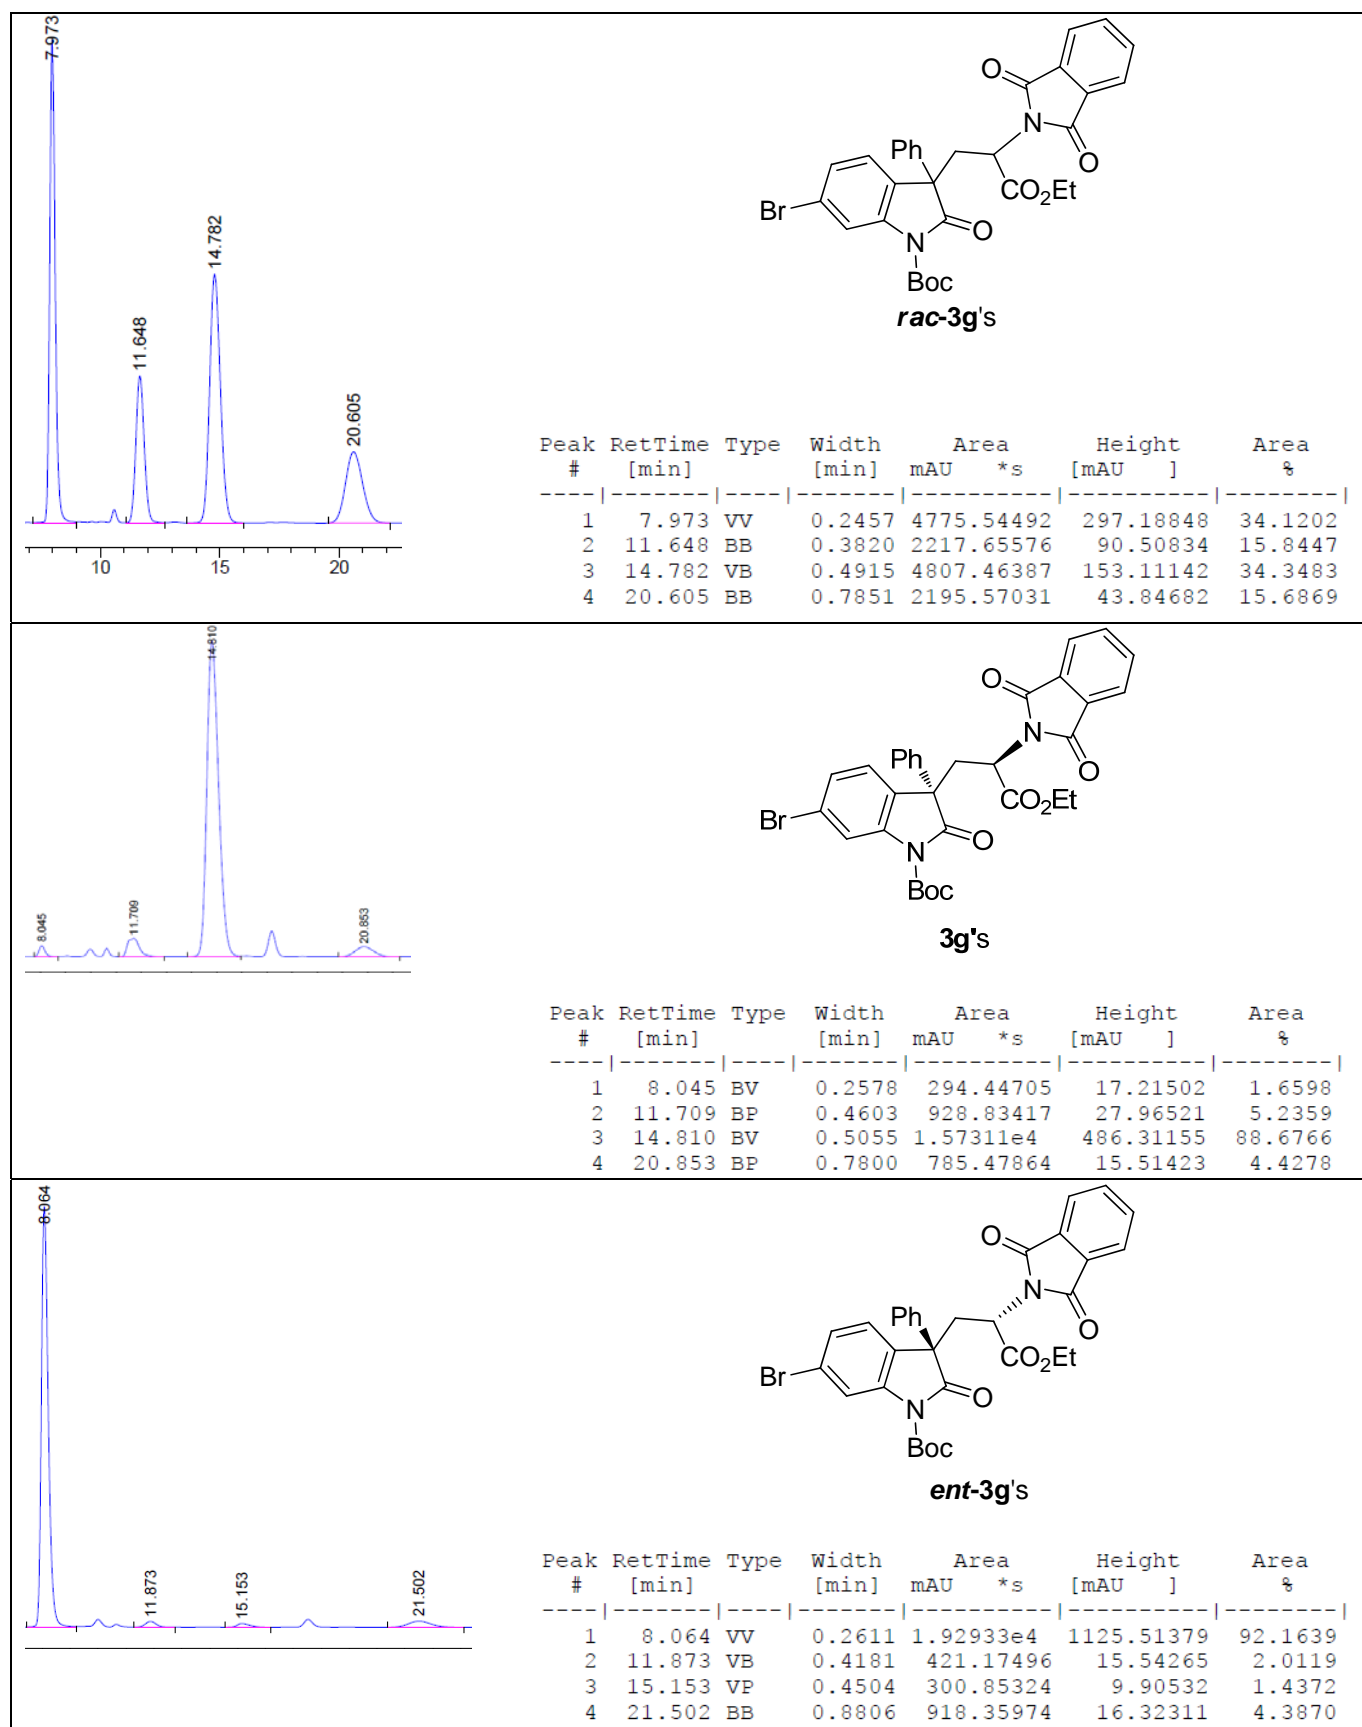

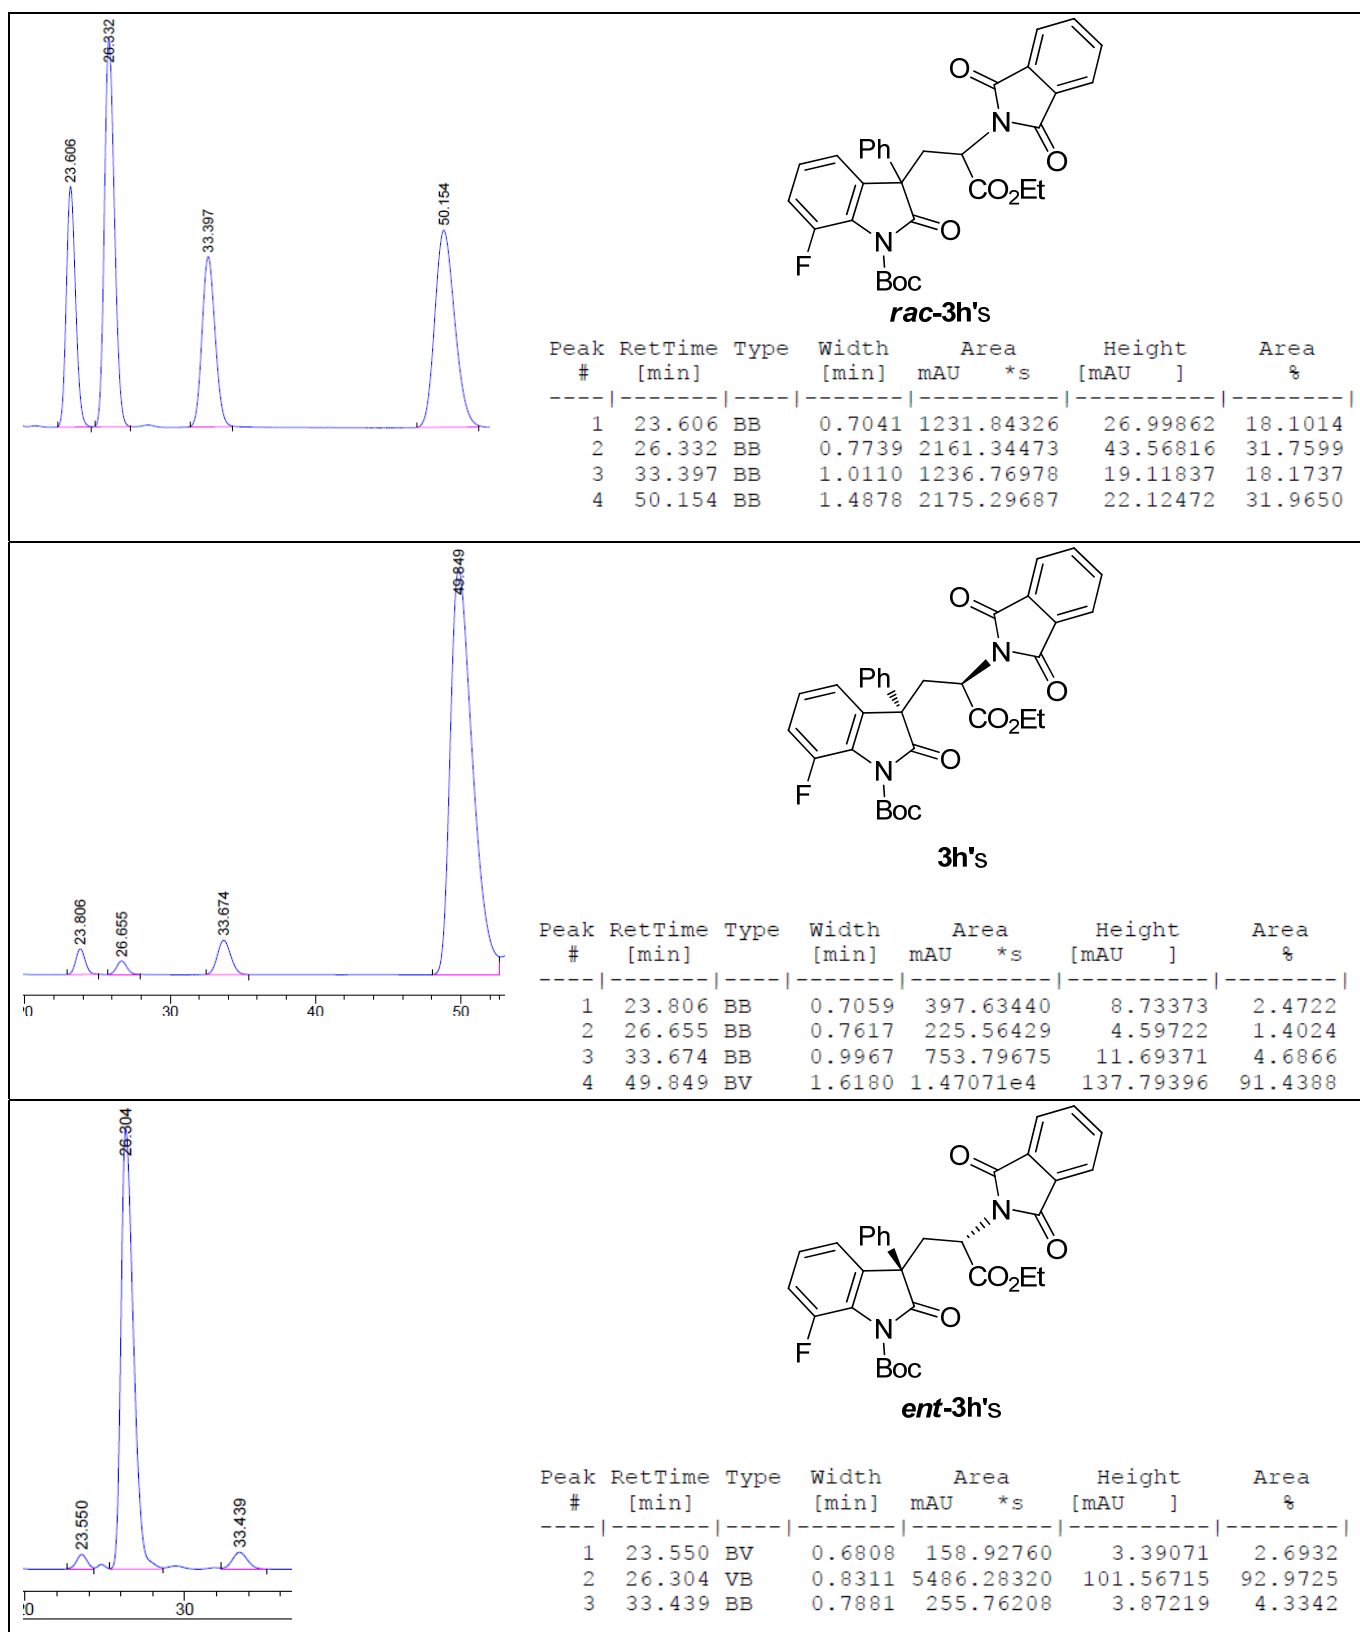

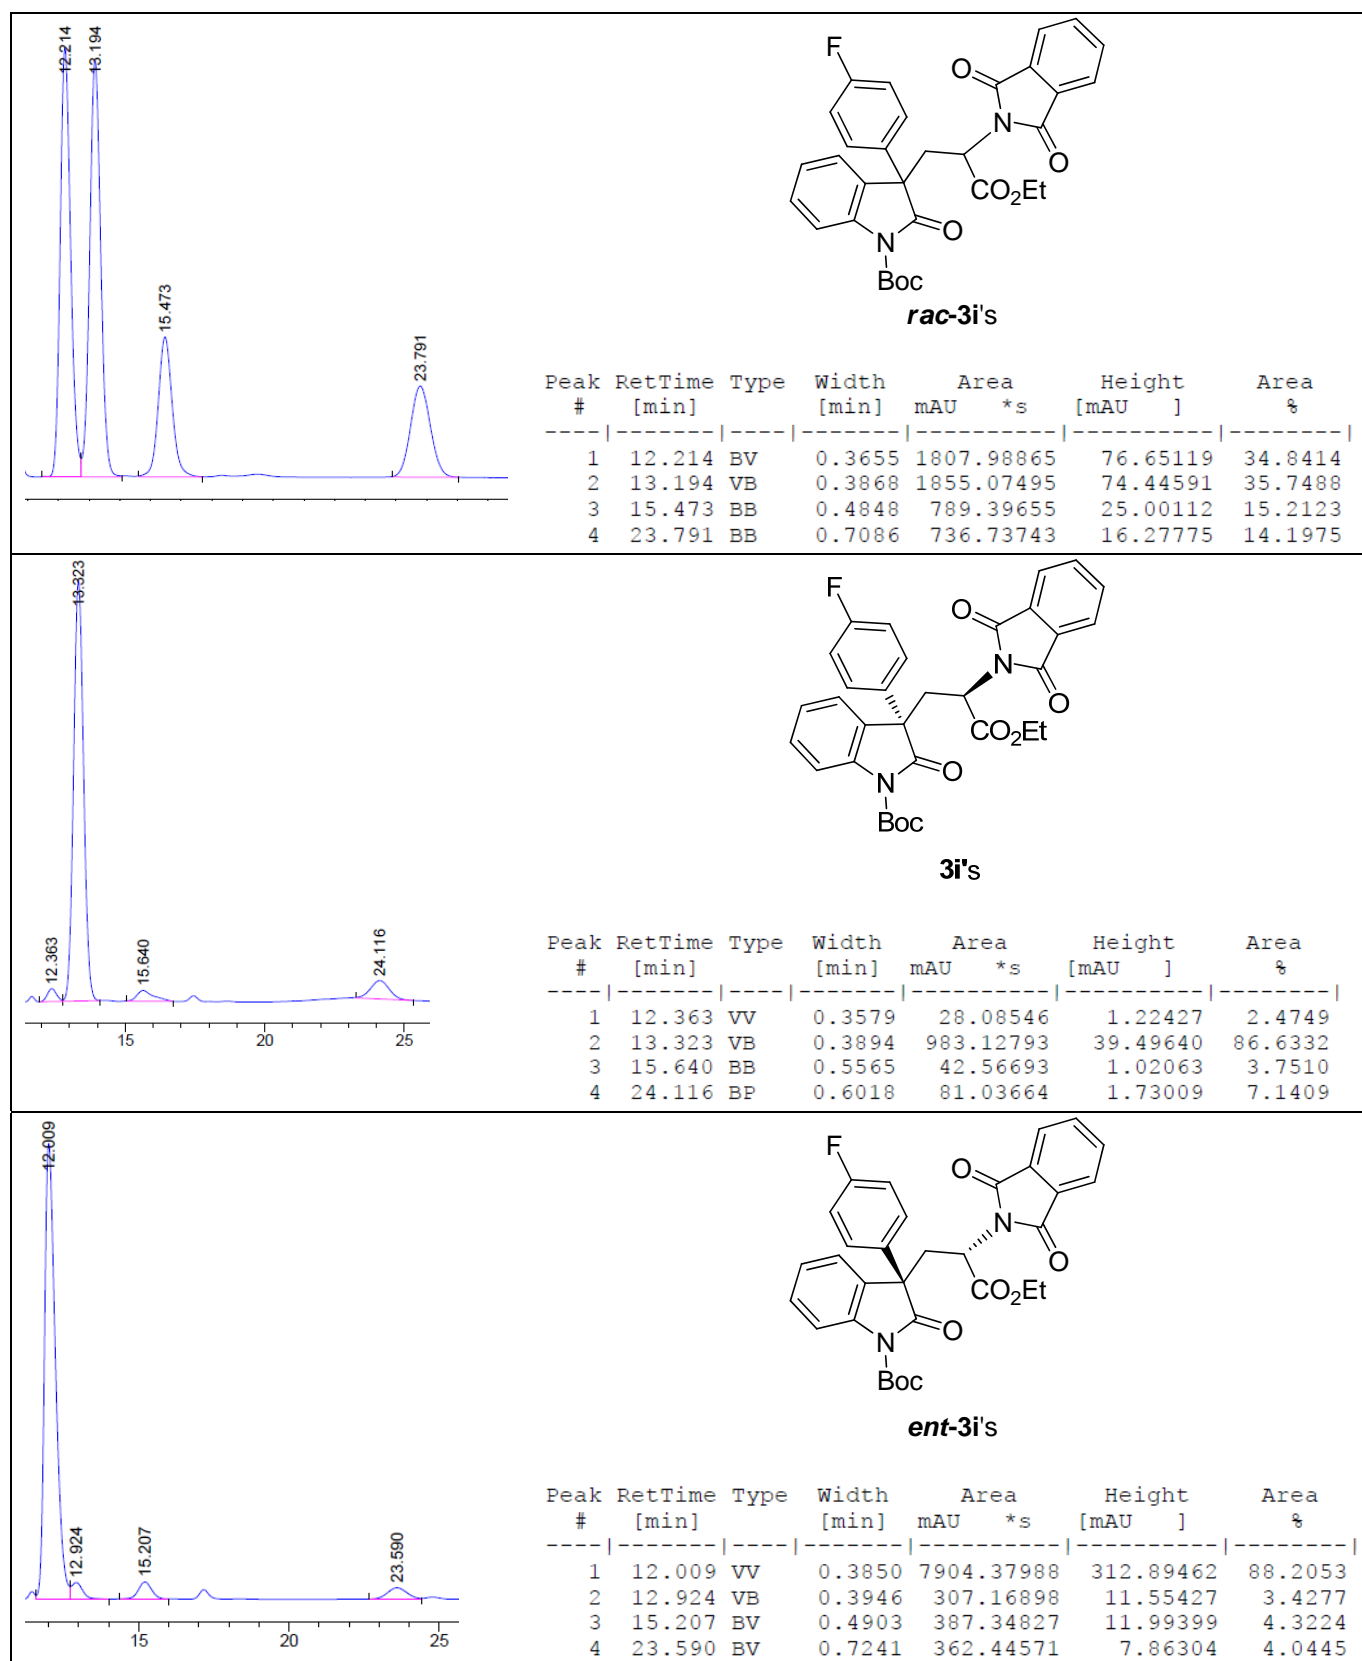

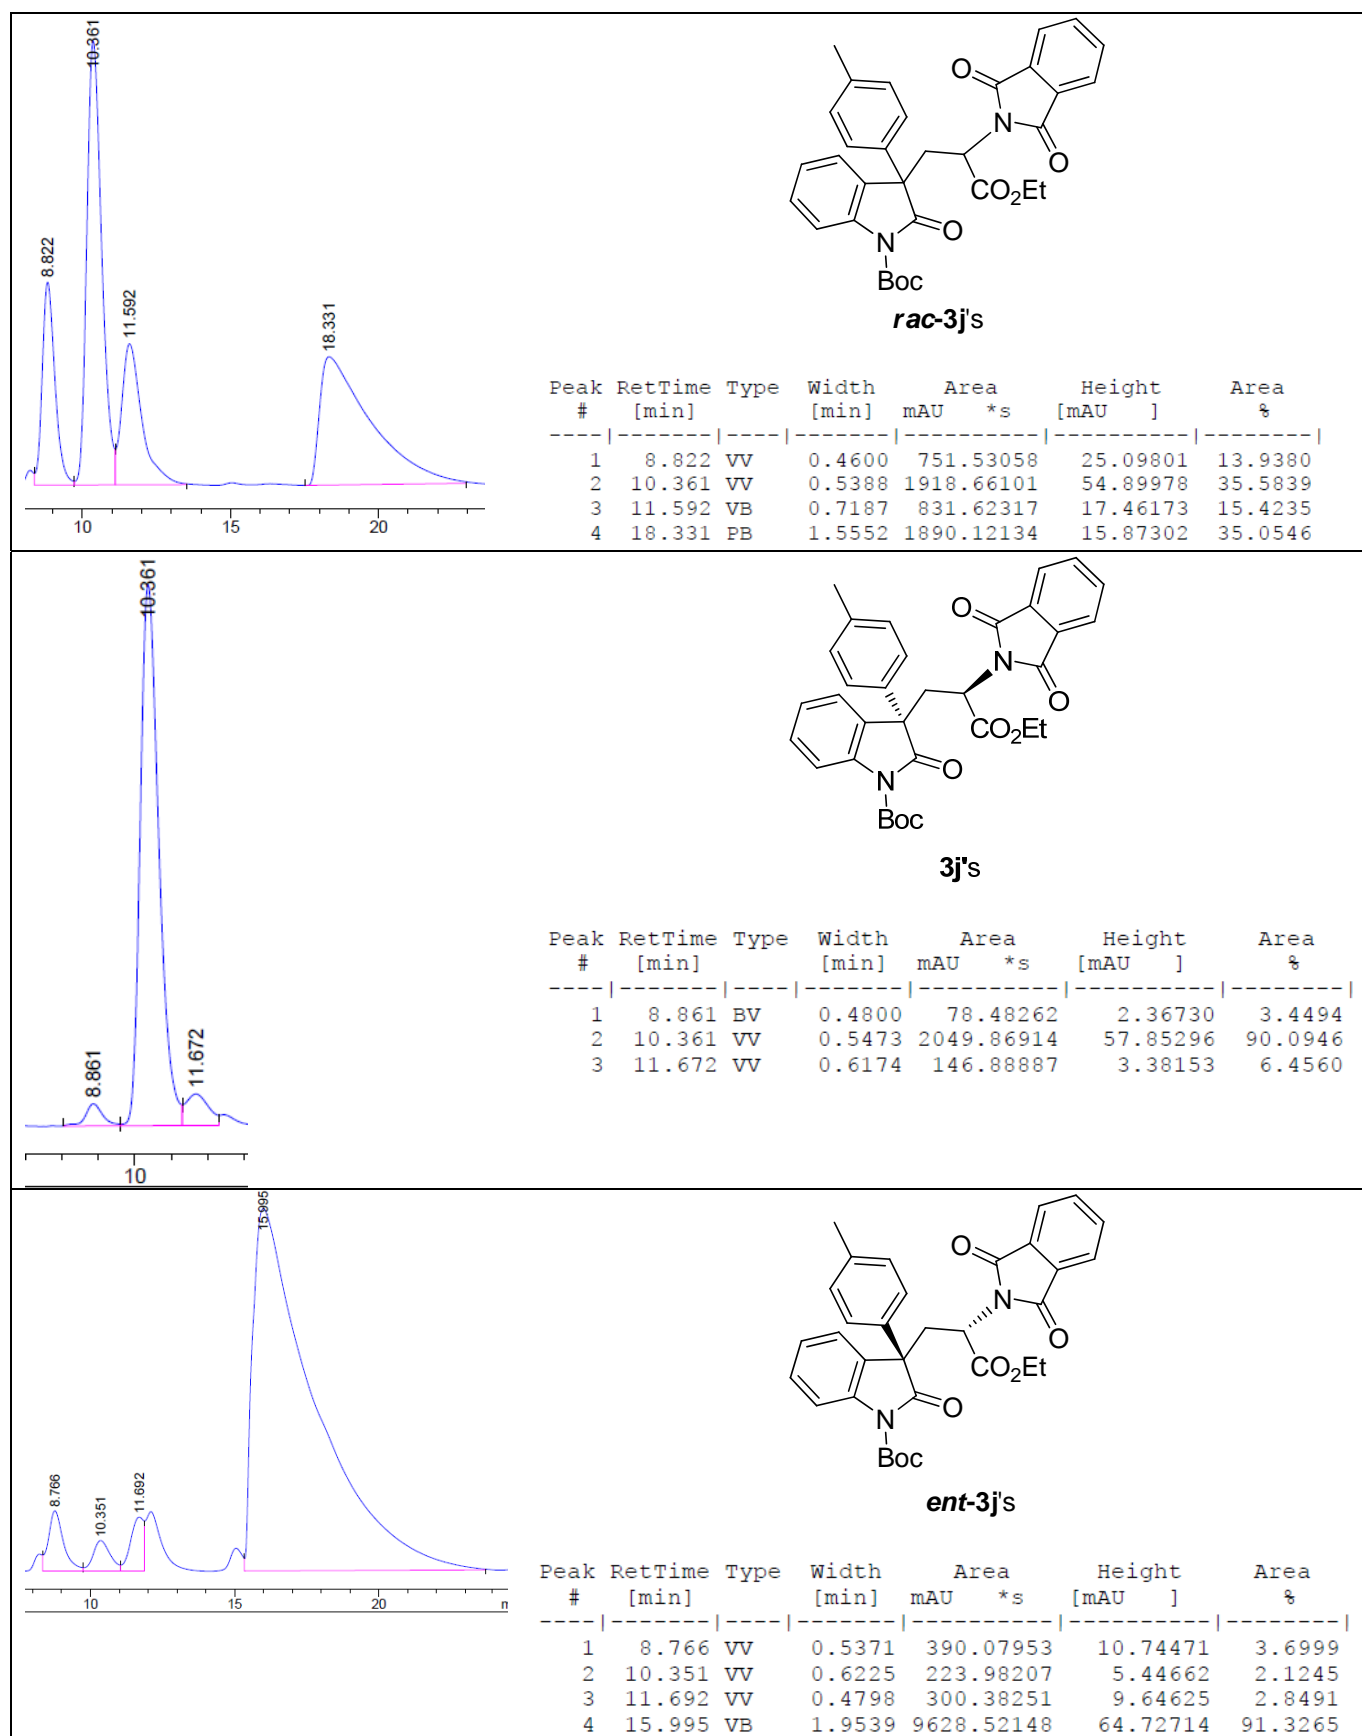

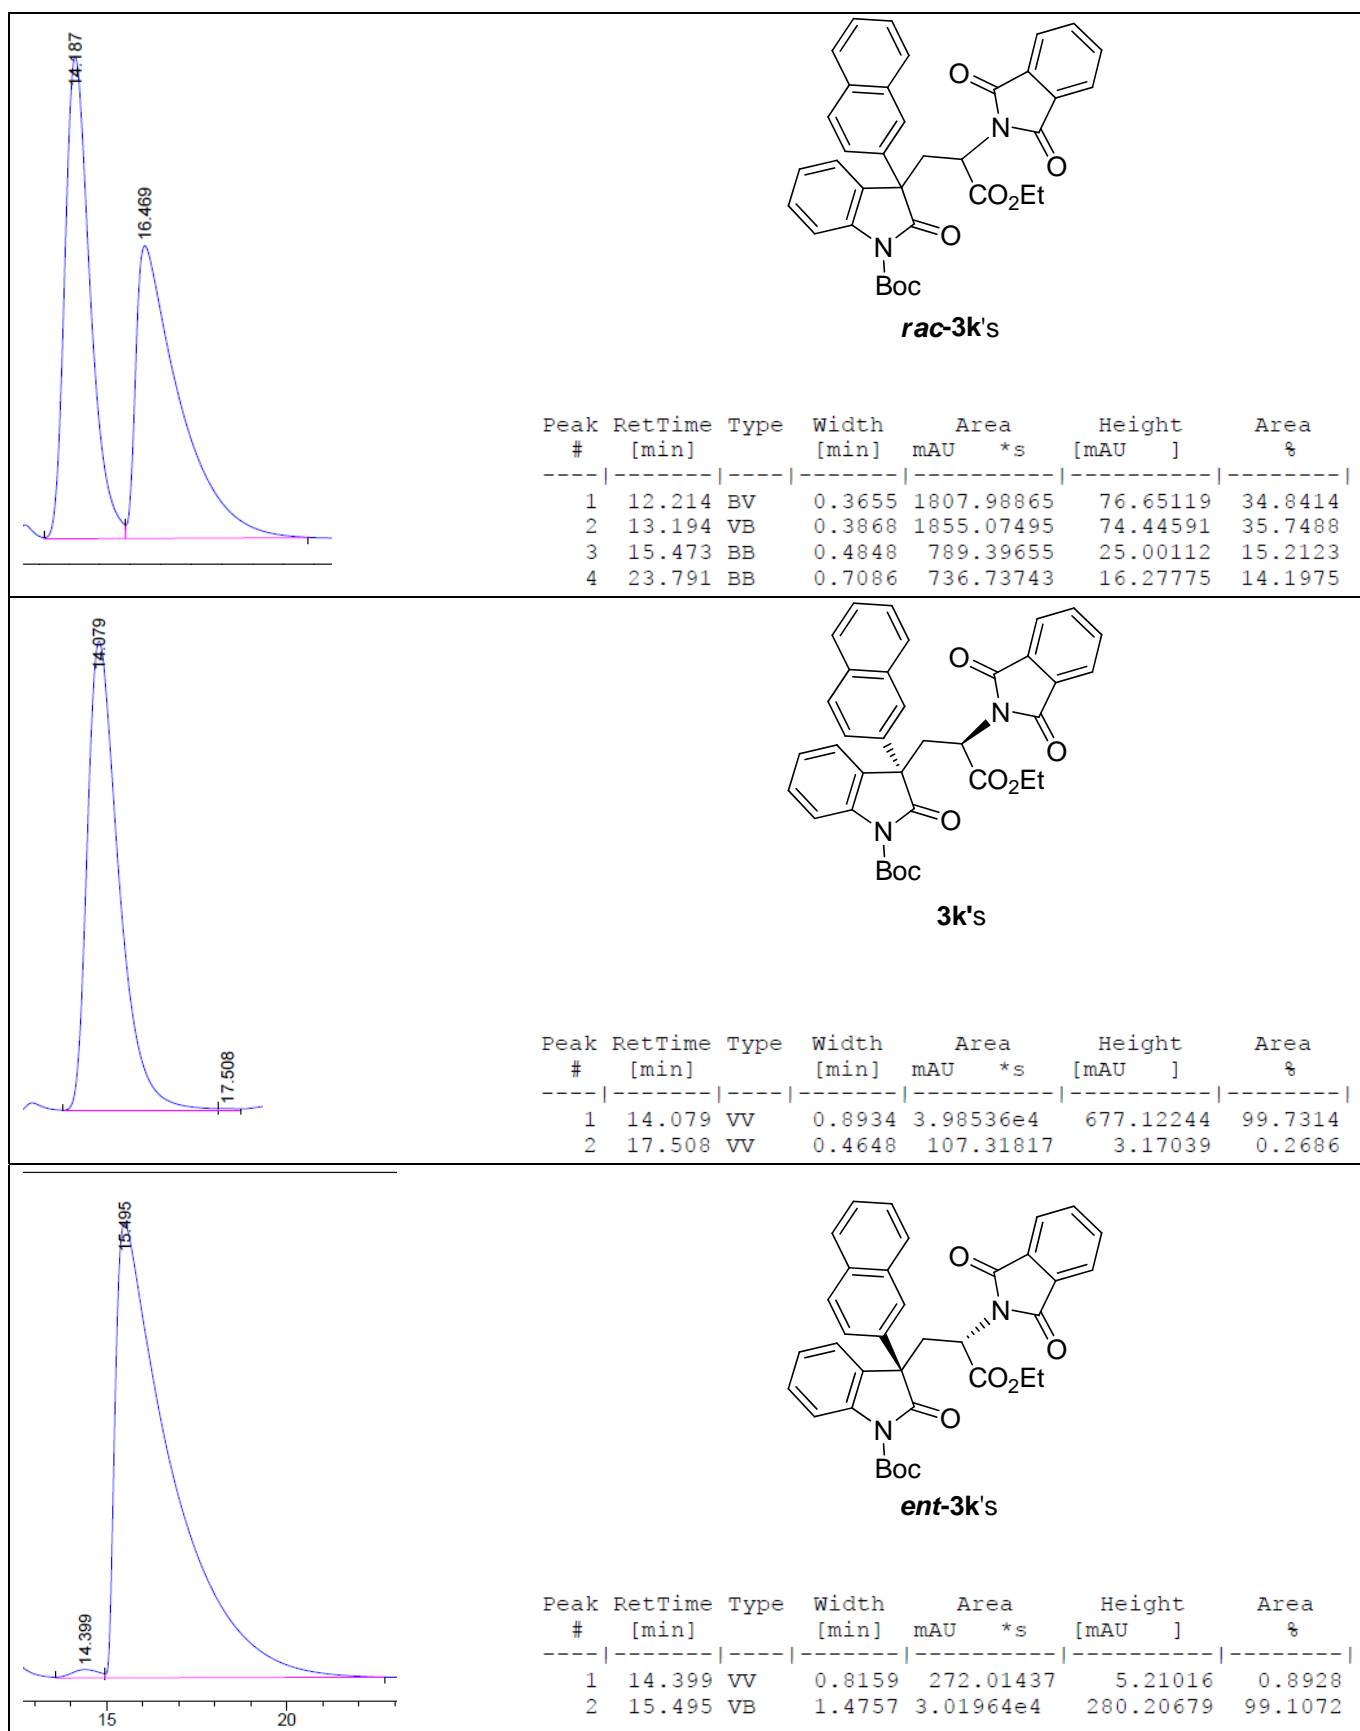

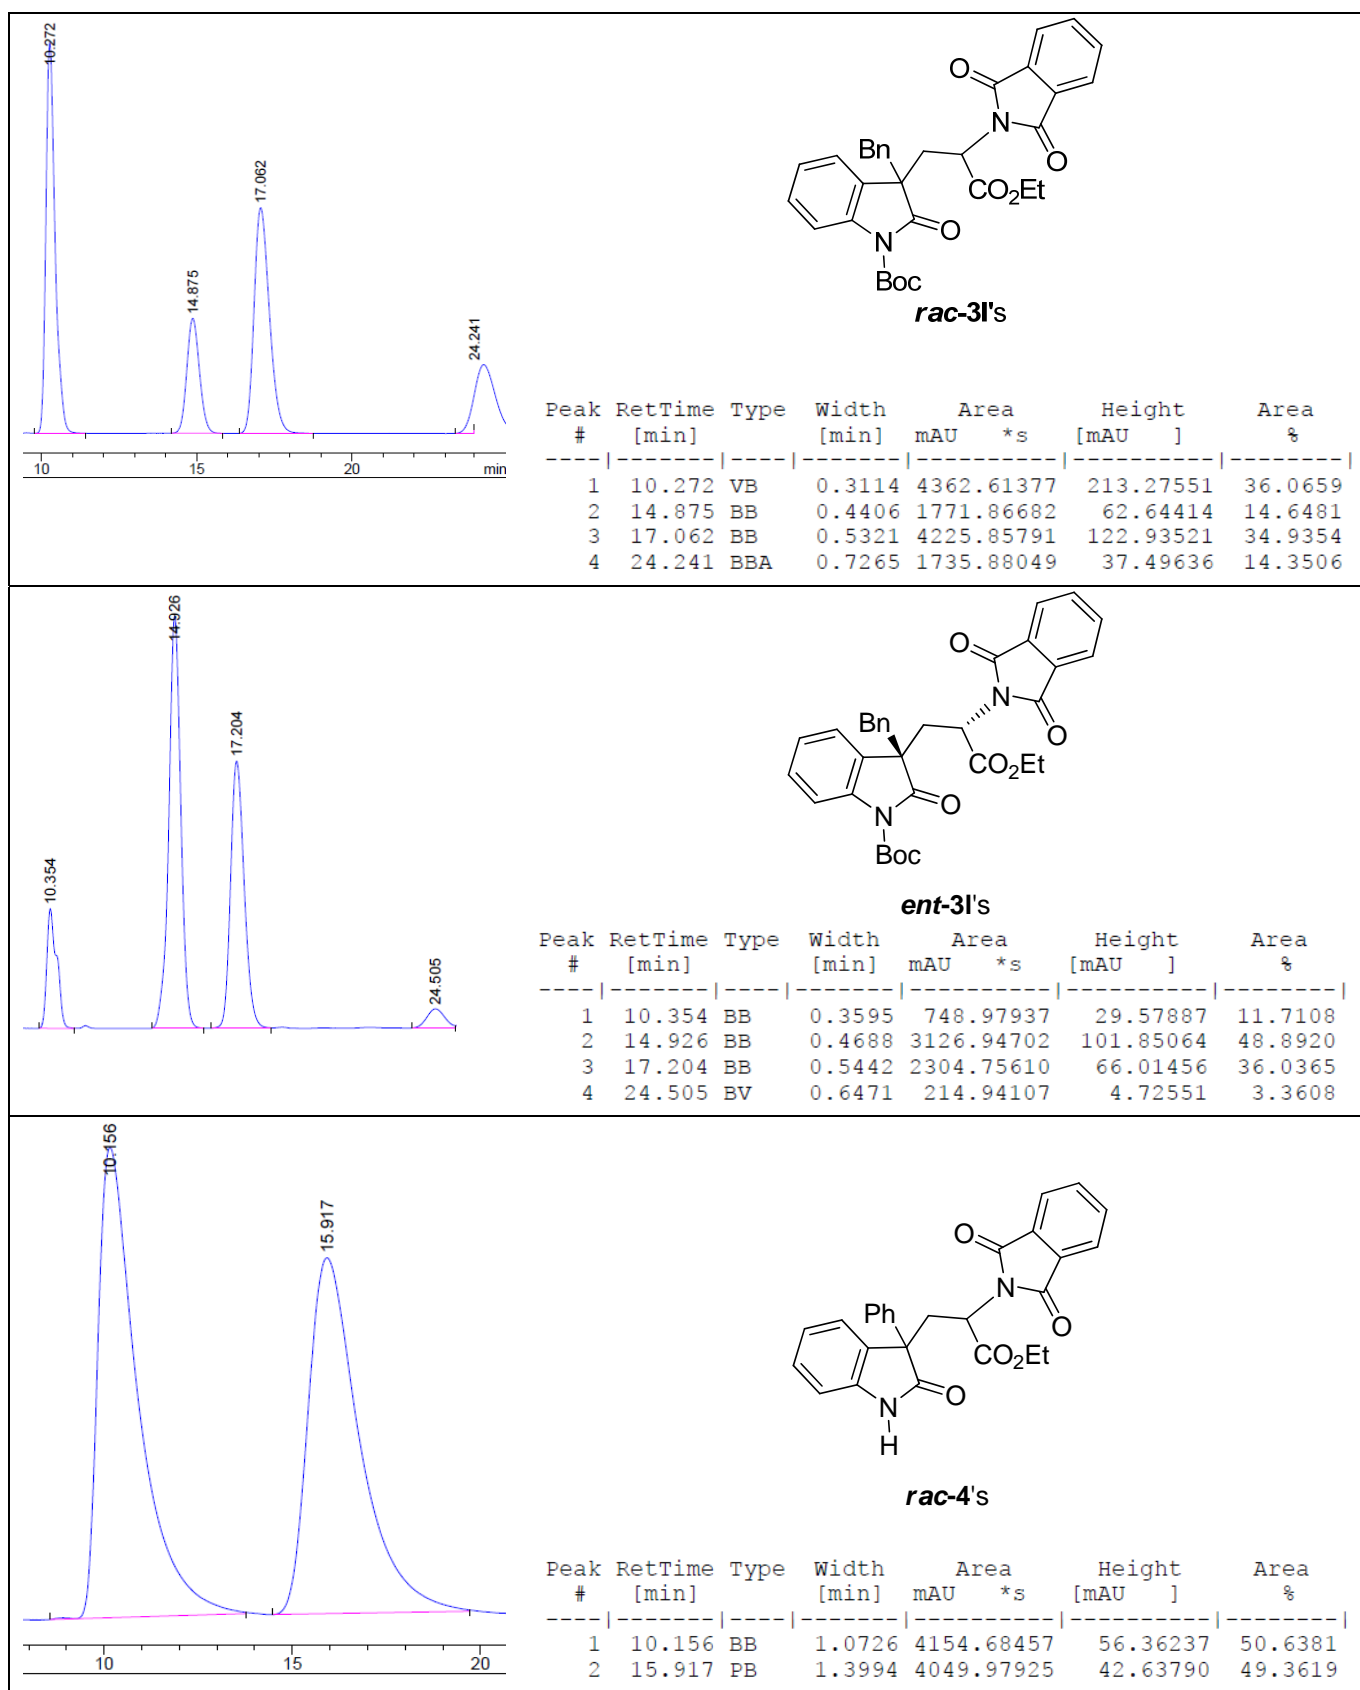

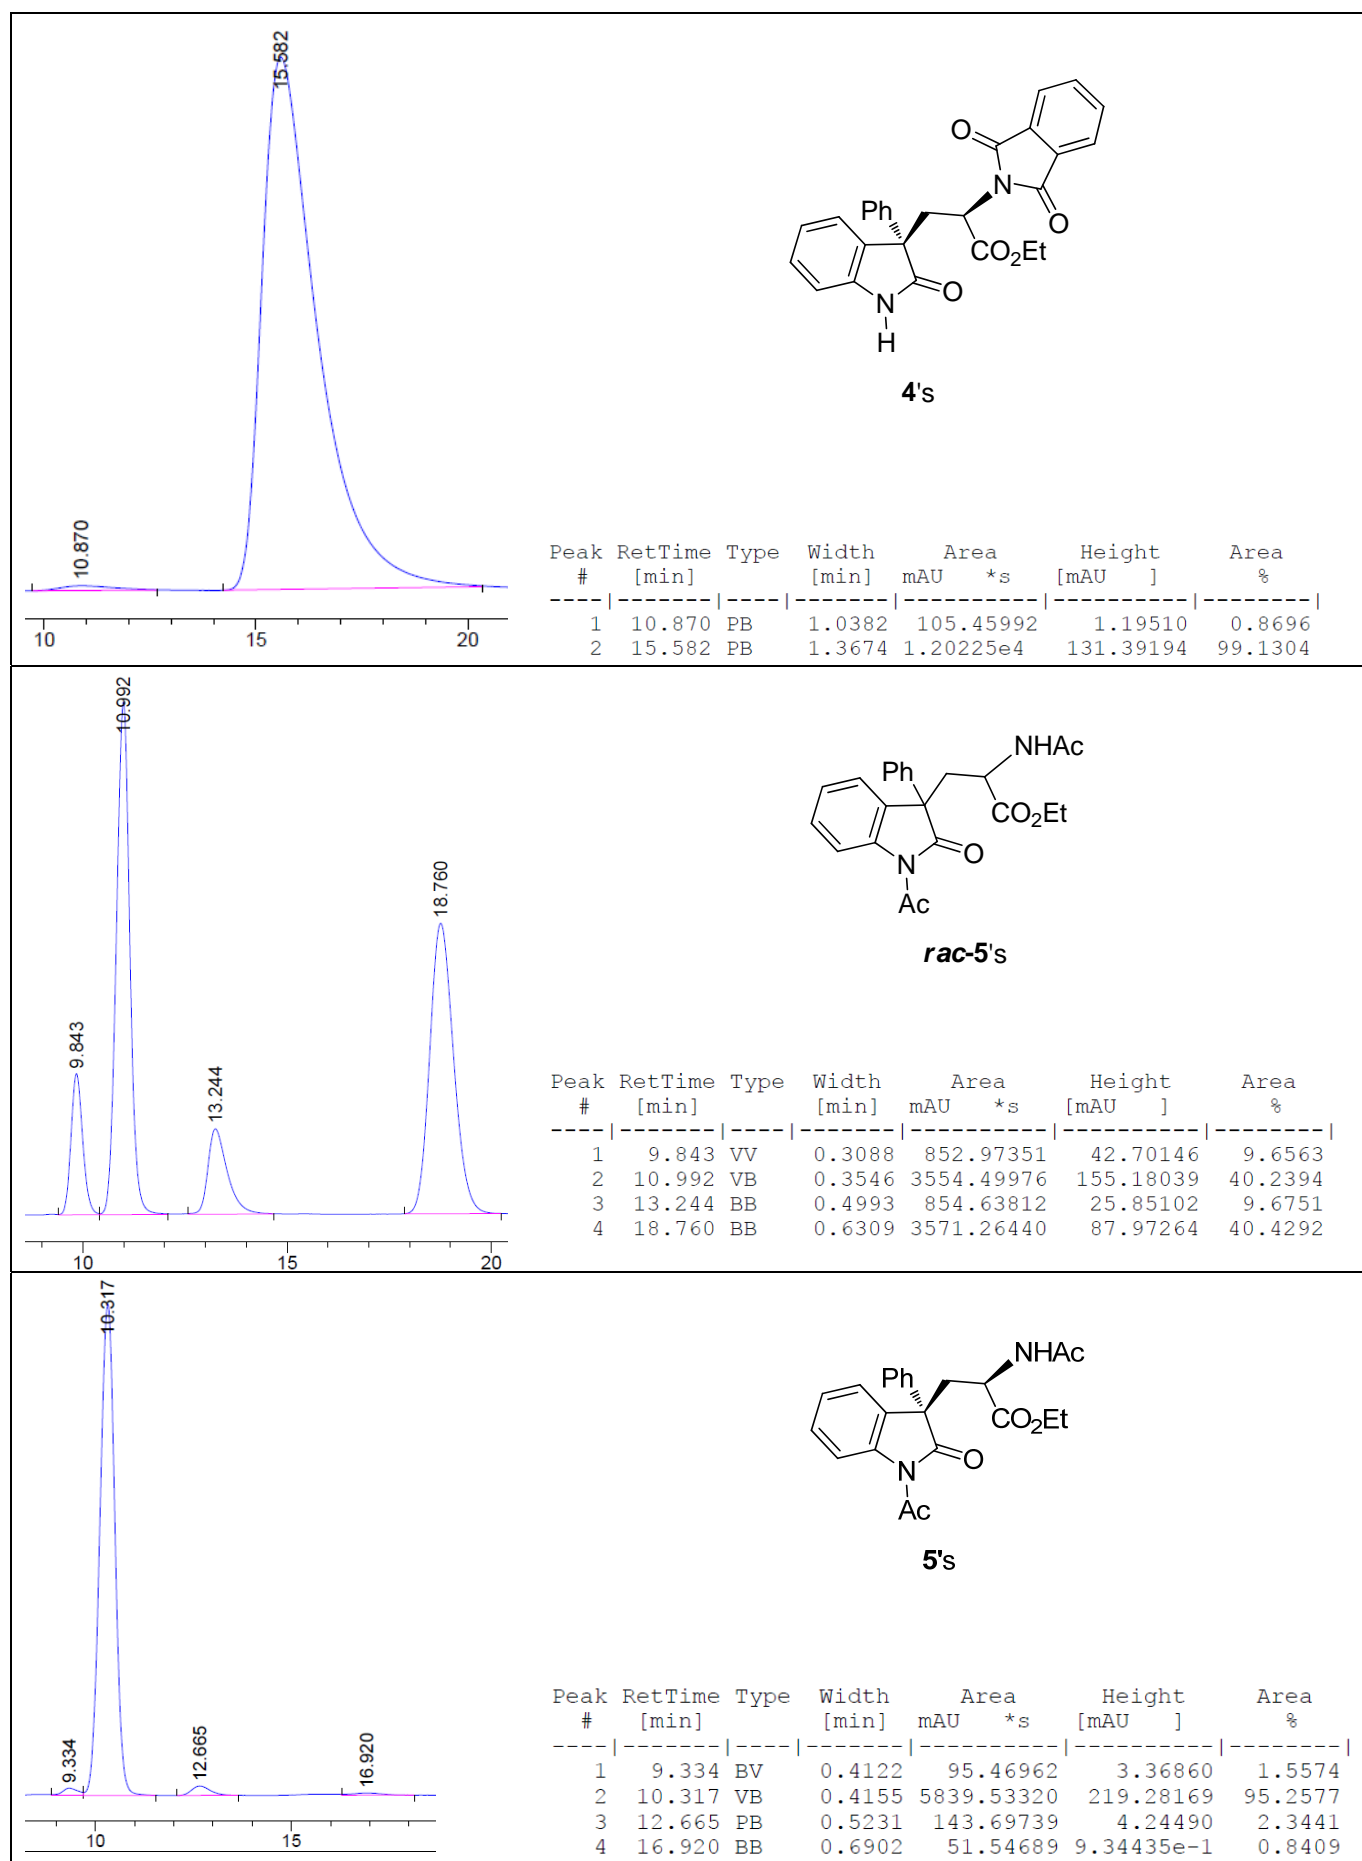

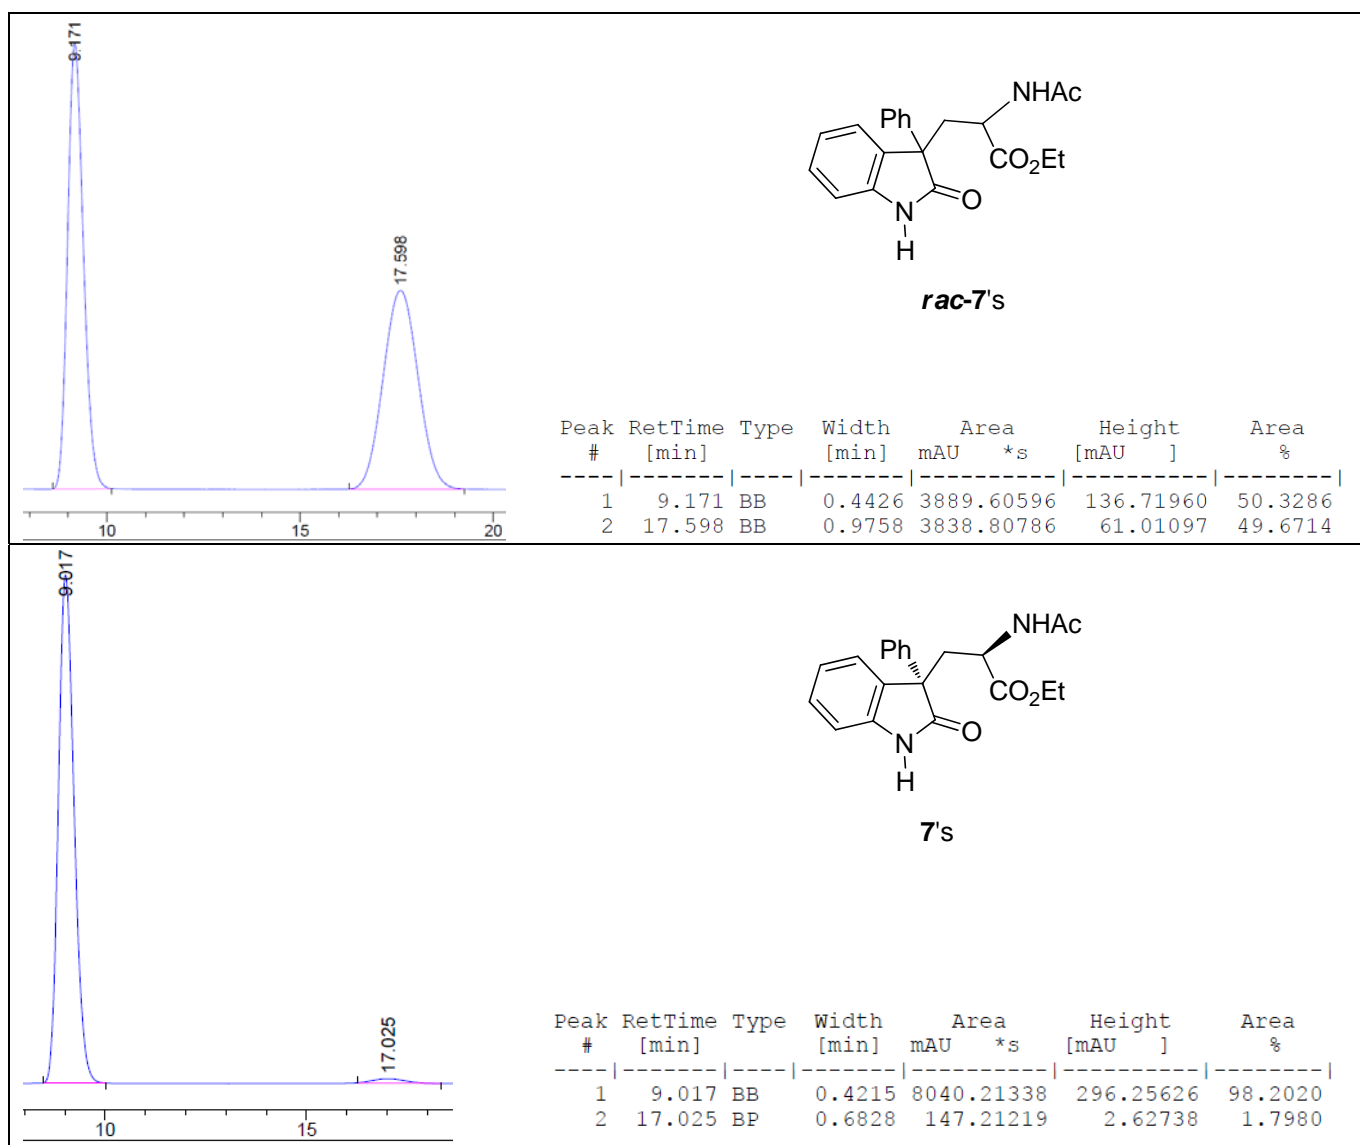

Supplement: Supplementary file 1 [file 4313527]
